# Supplementary material for: iCanClean Improves Independent Component Analysis of Mobile Brain Imaging with EEG
Source: MDPI journal article supplement (doi:10.3390/s23020928), 2023-01-13

**Young Adult without using iCanClean** all plots are listed in decreasing %brain according to ICLabel, those highlighted in blue were >50% brain and had <15% RV

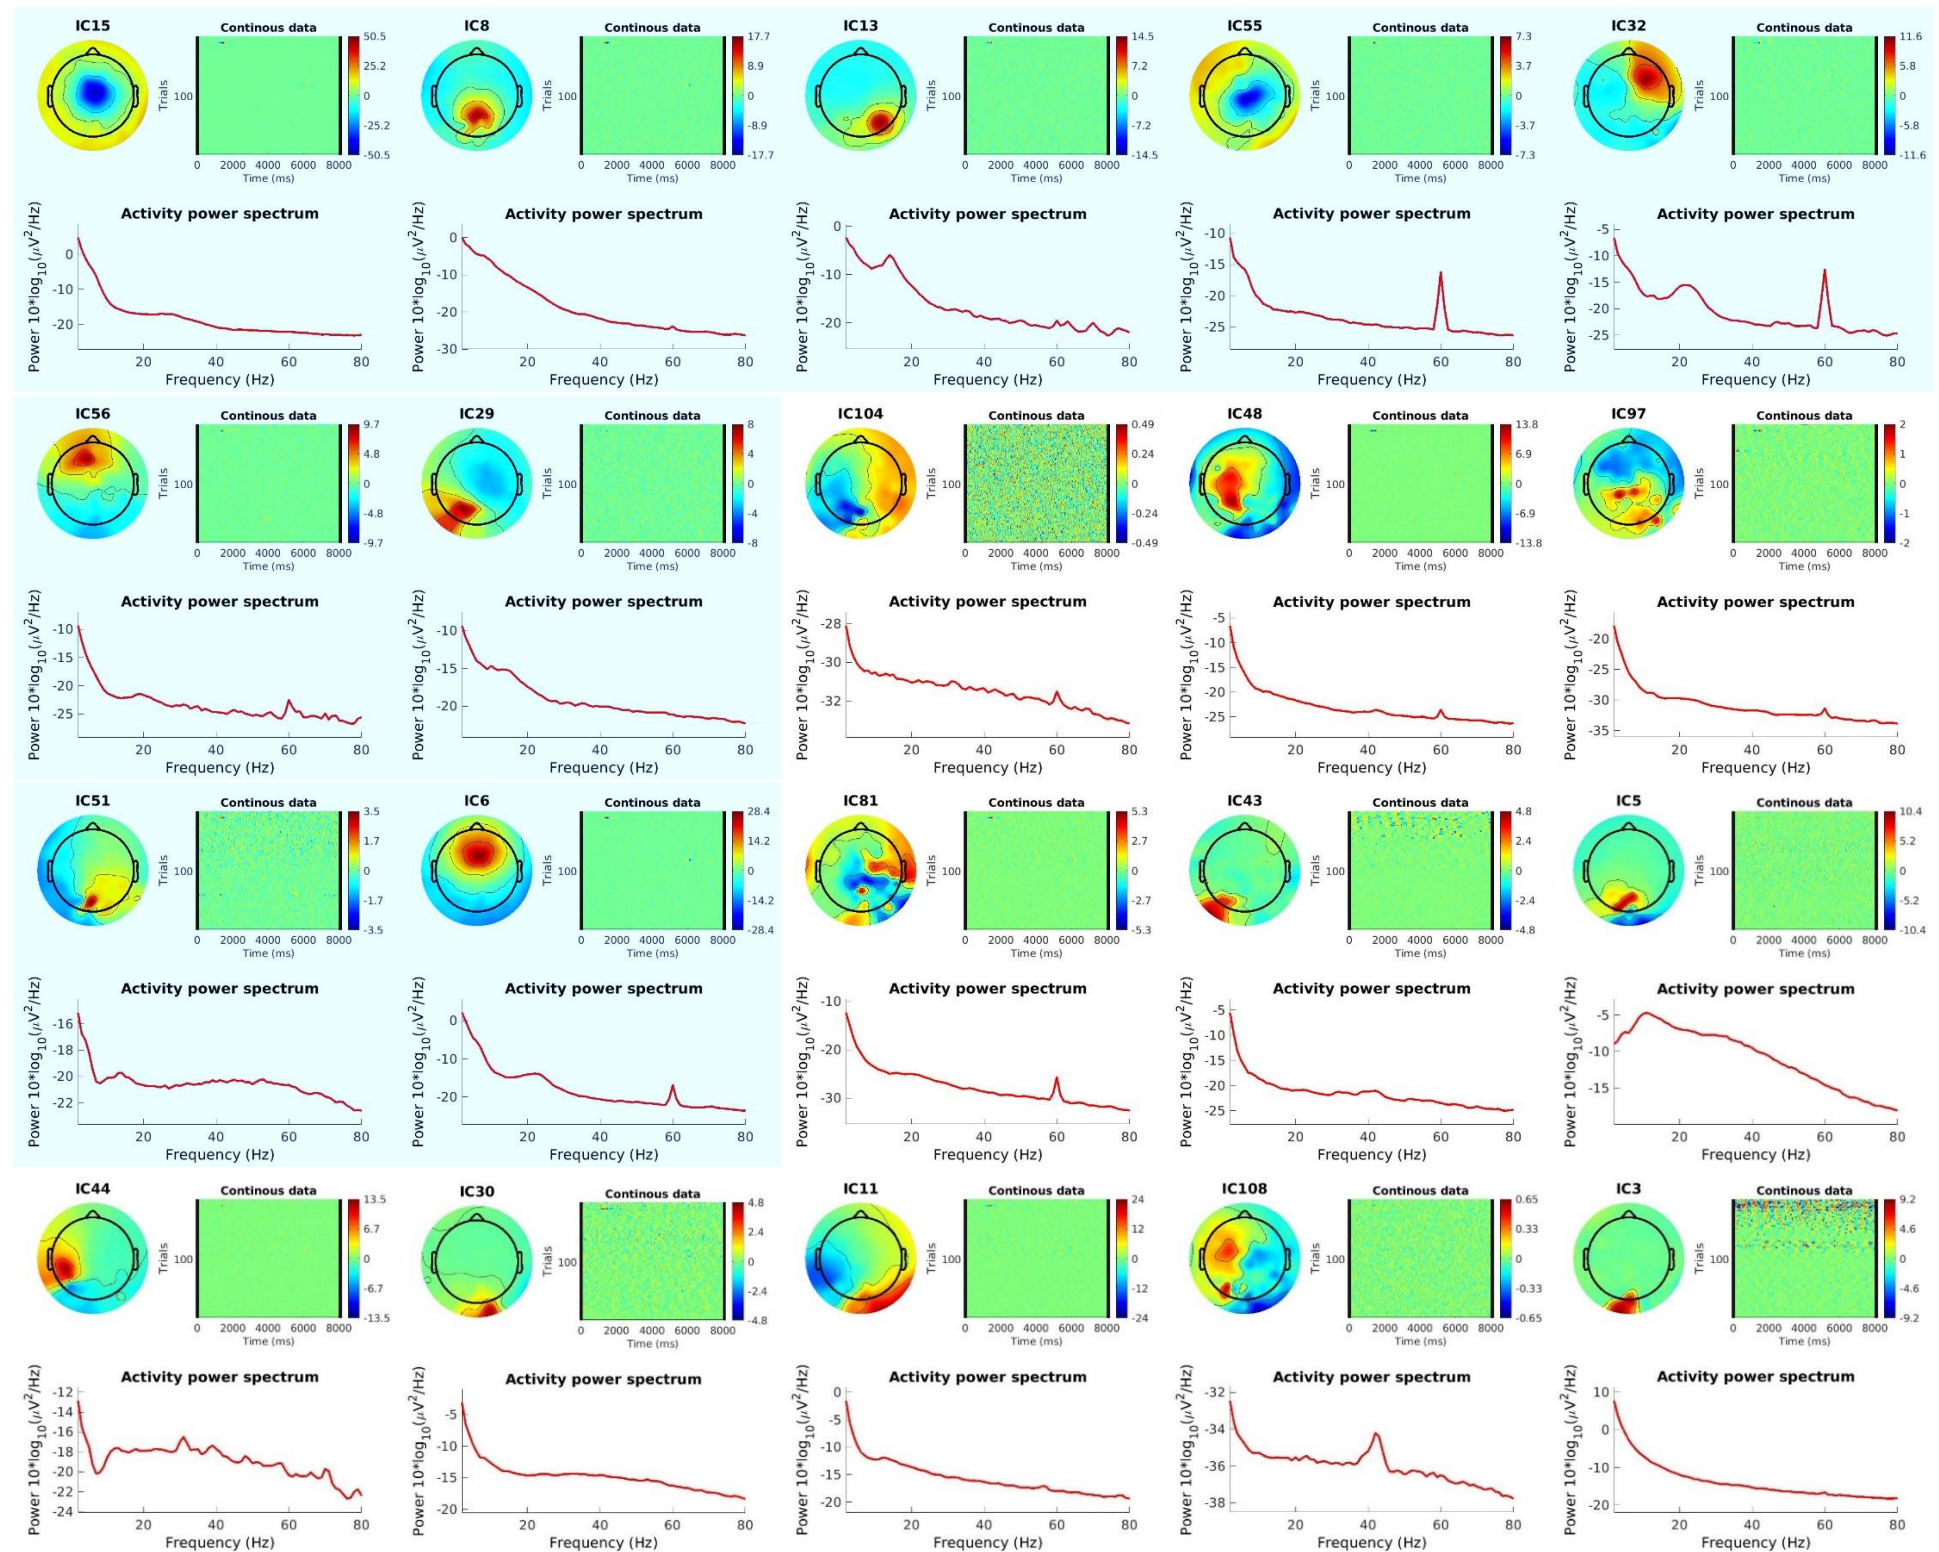

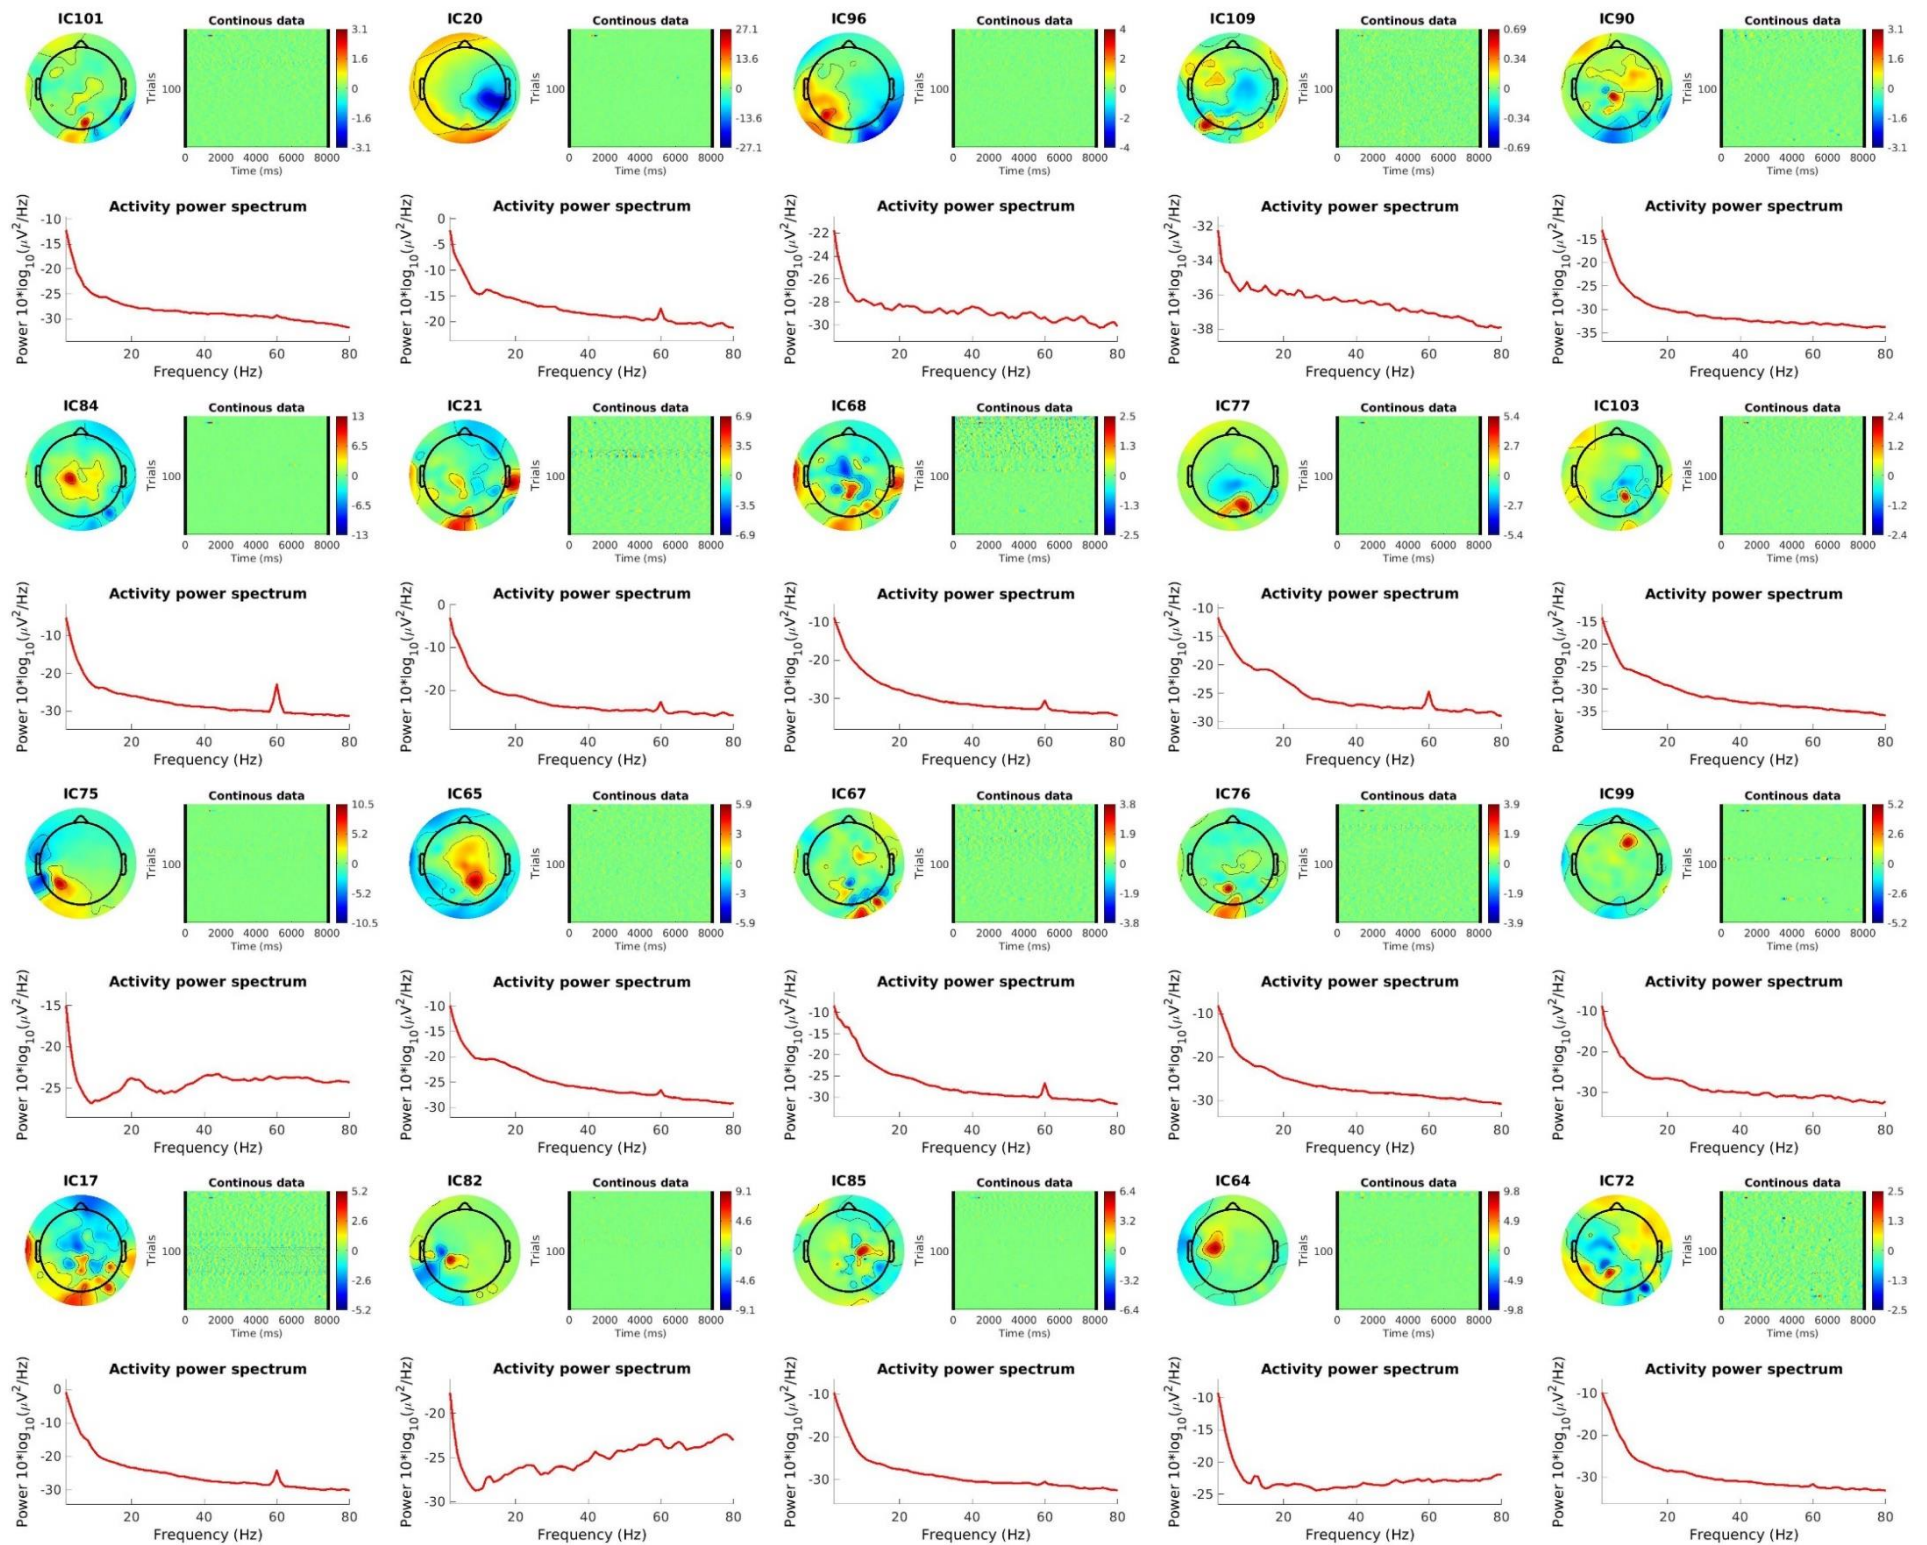



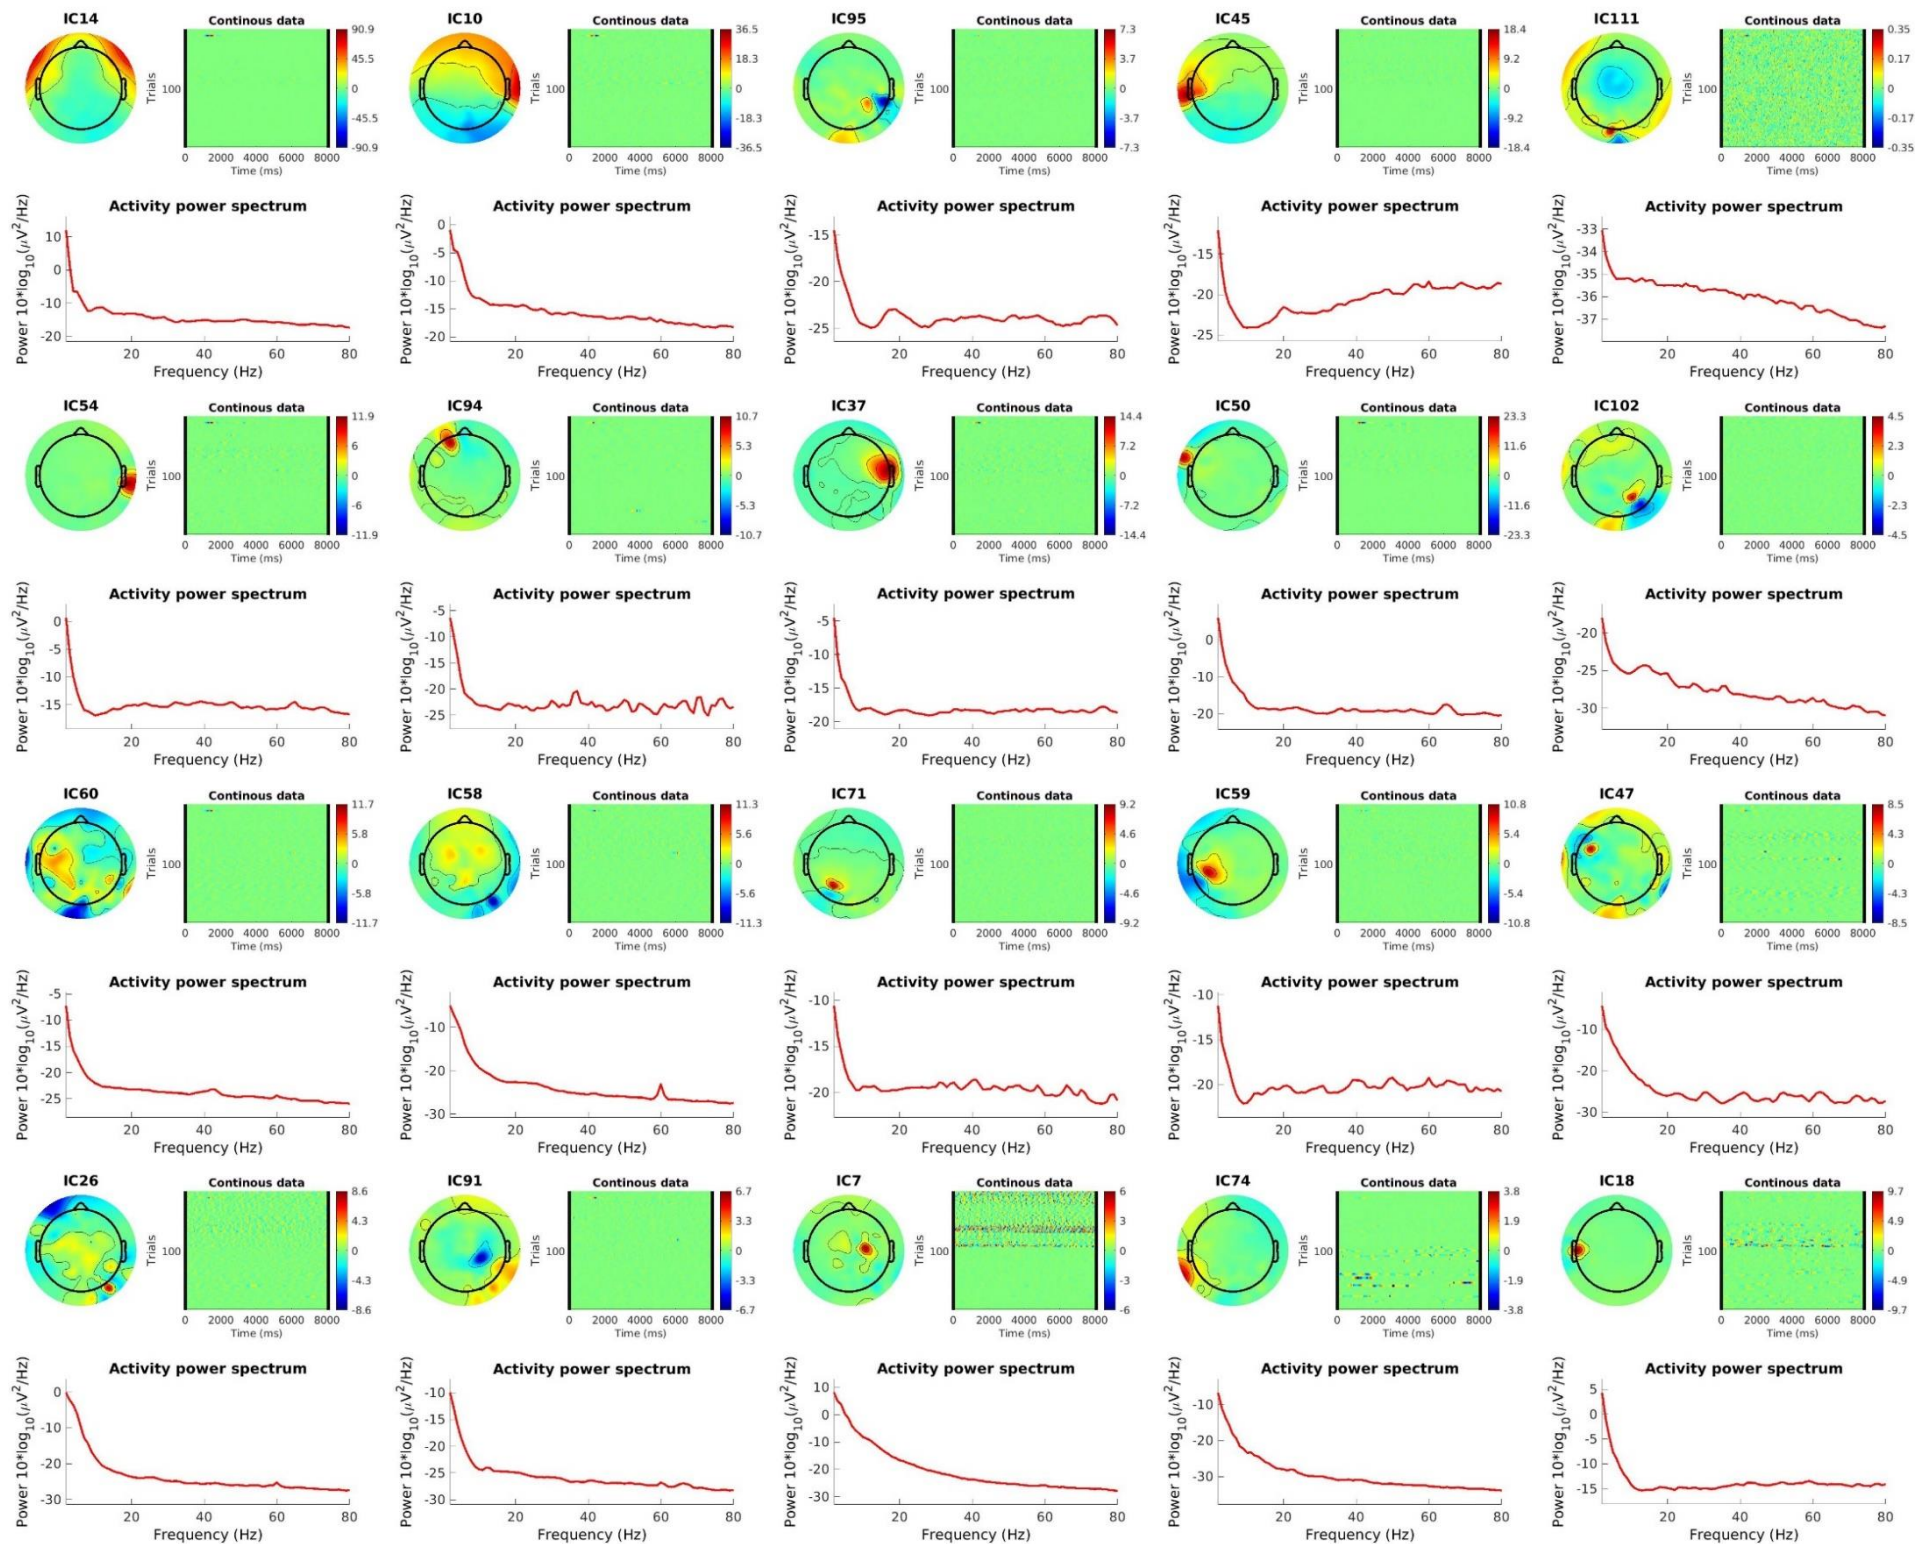

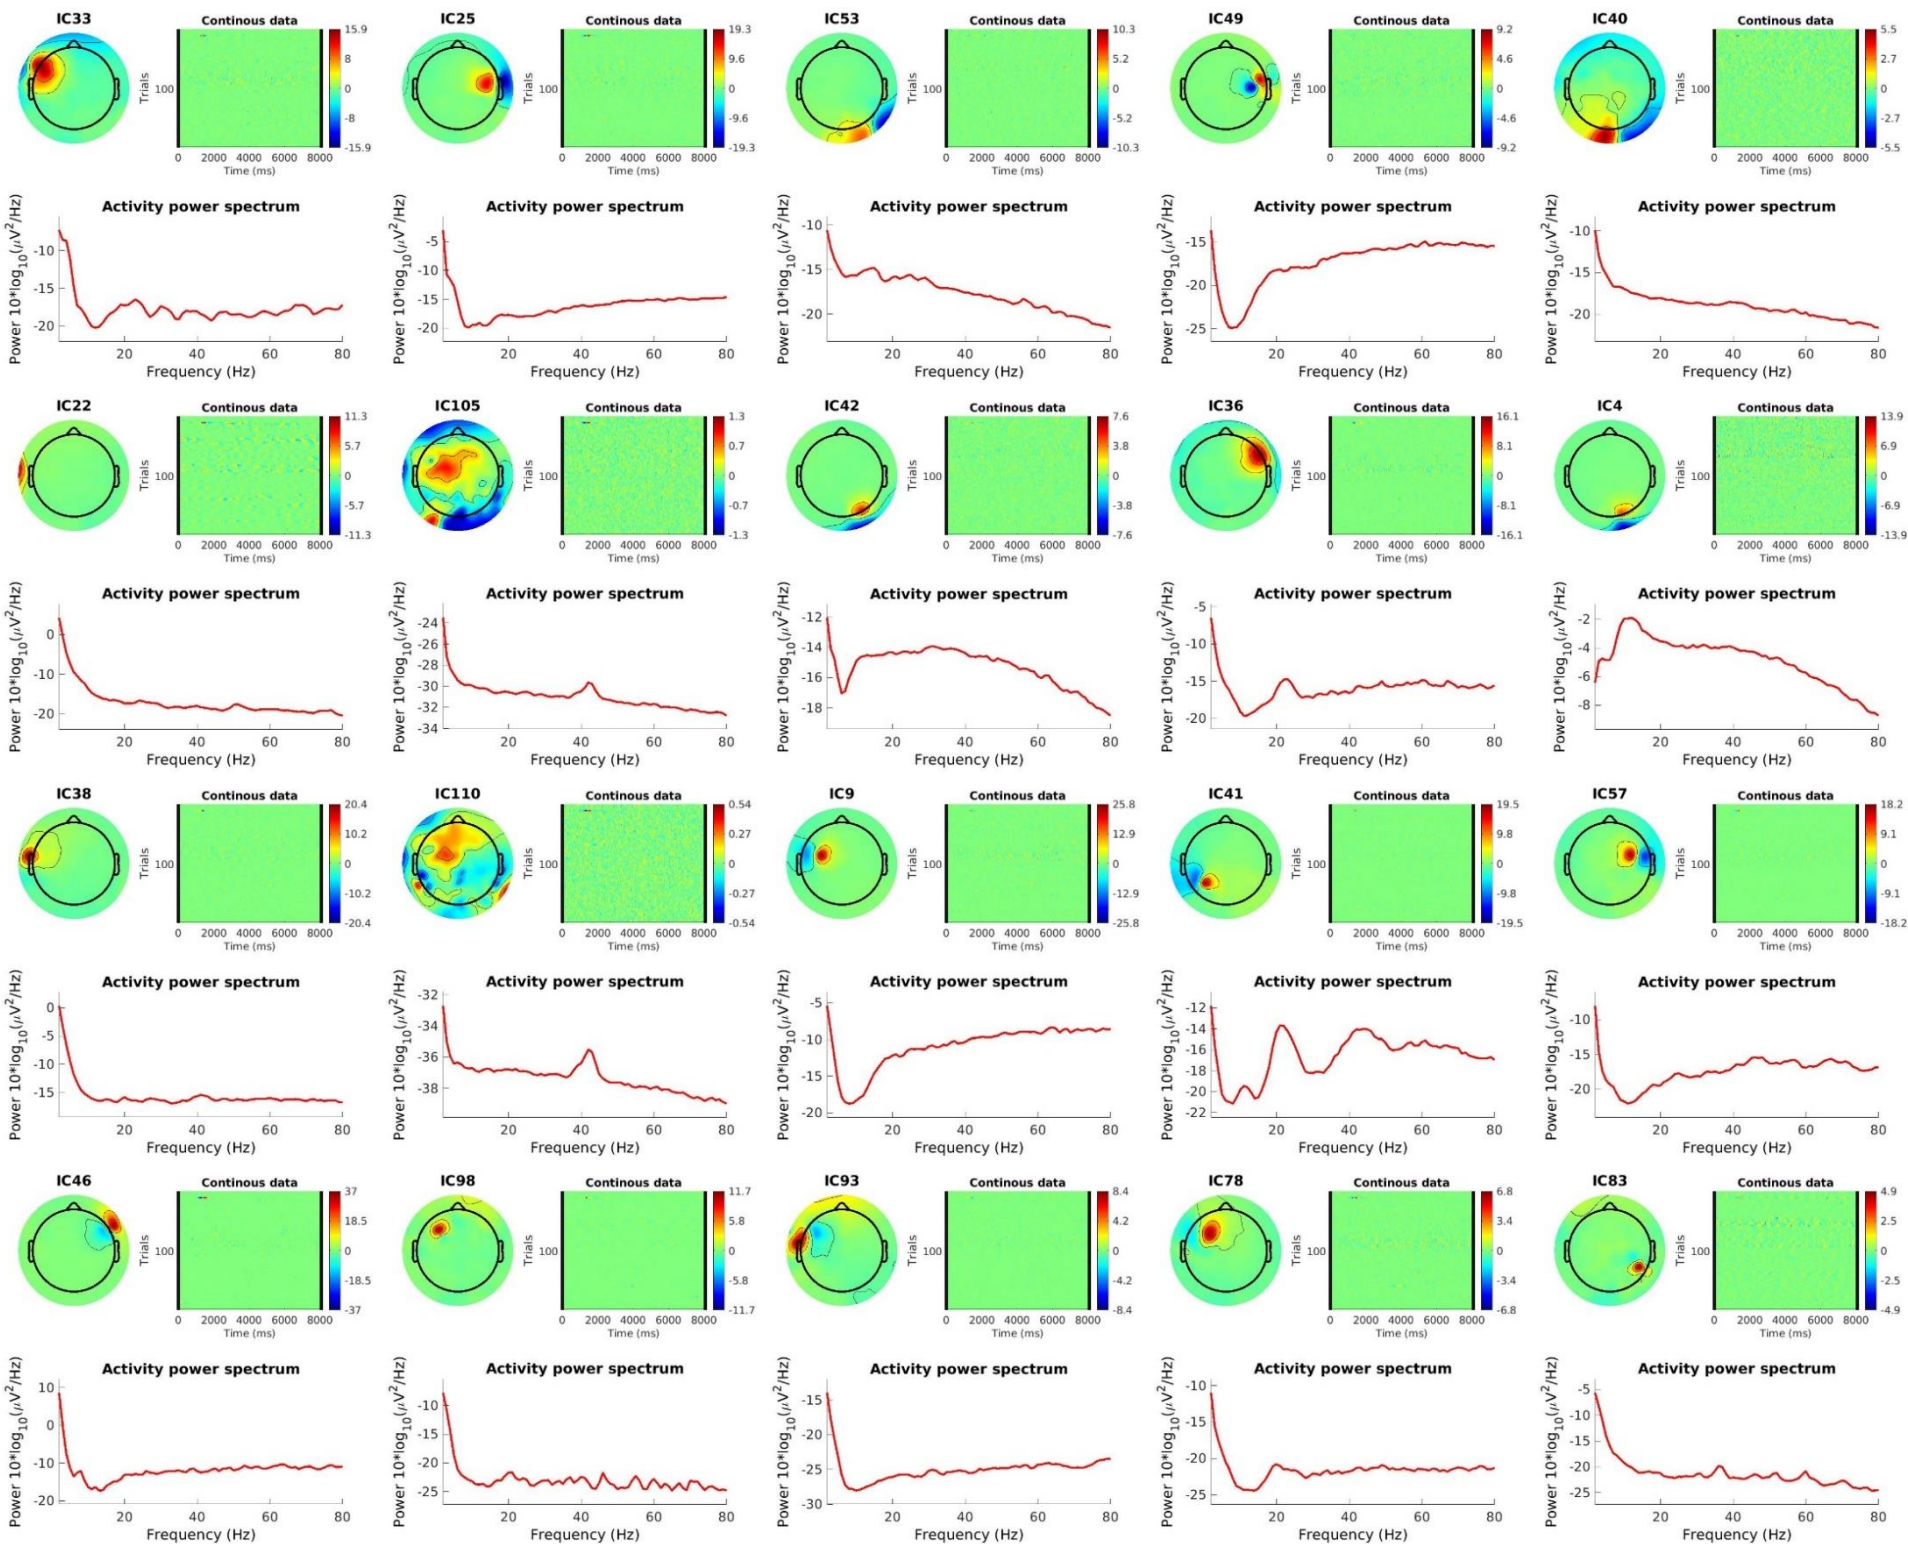



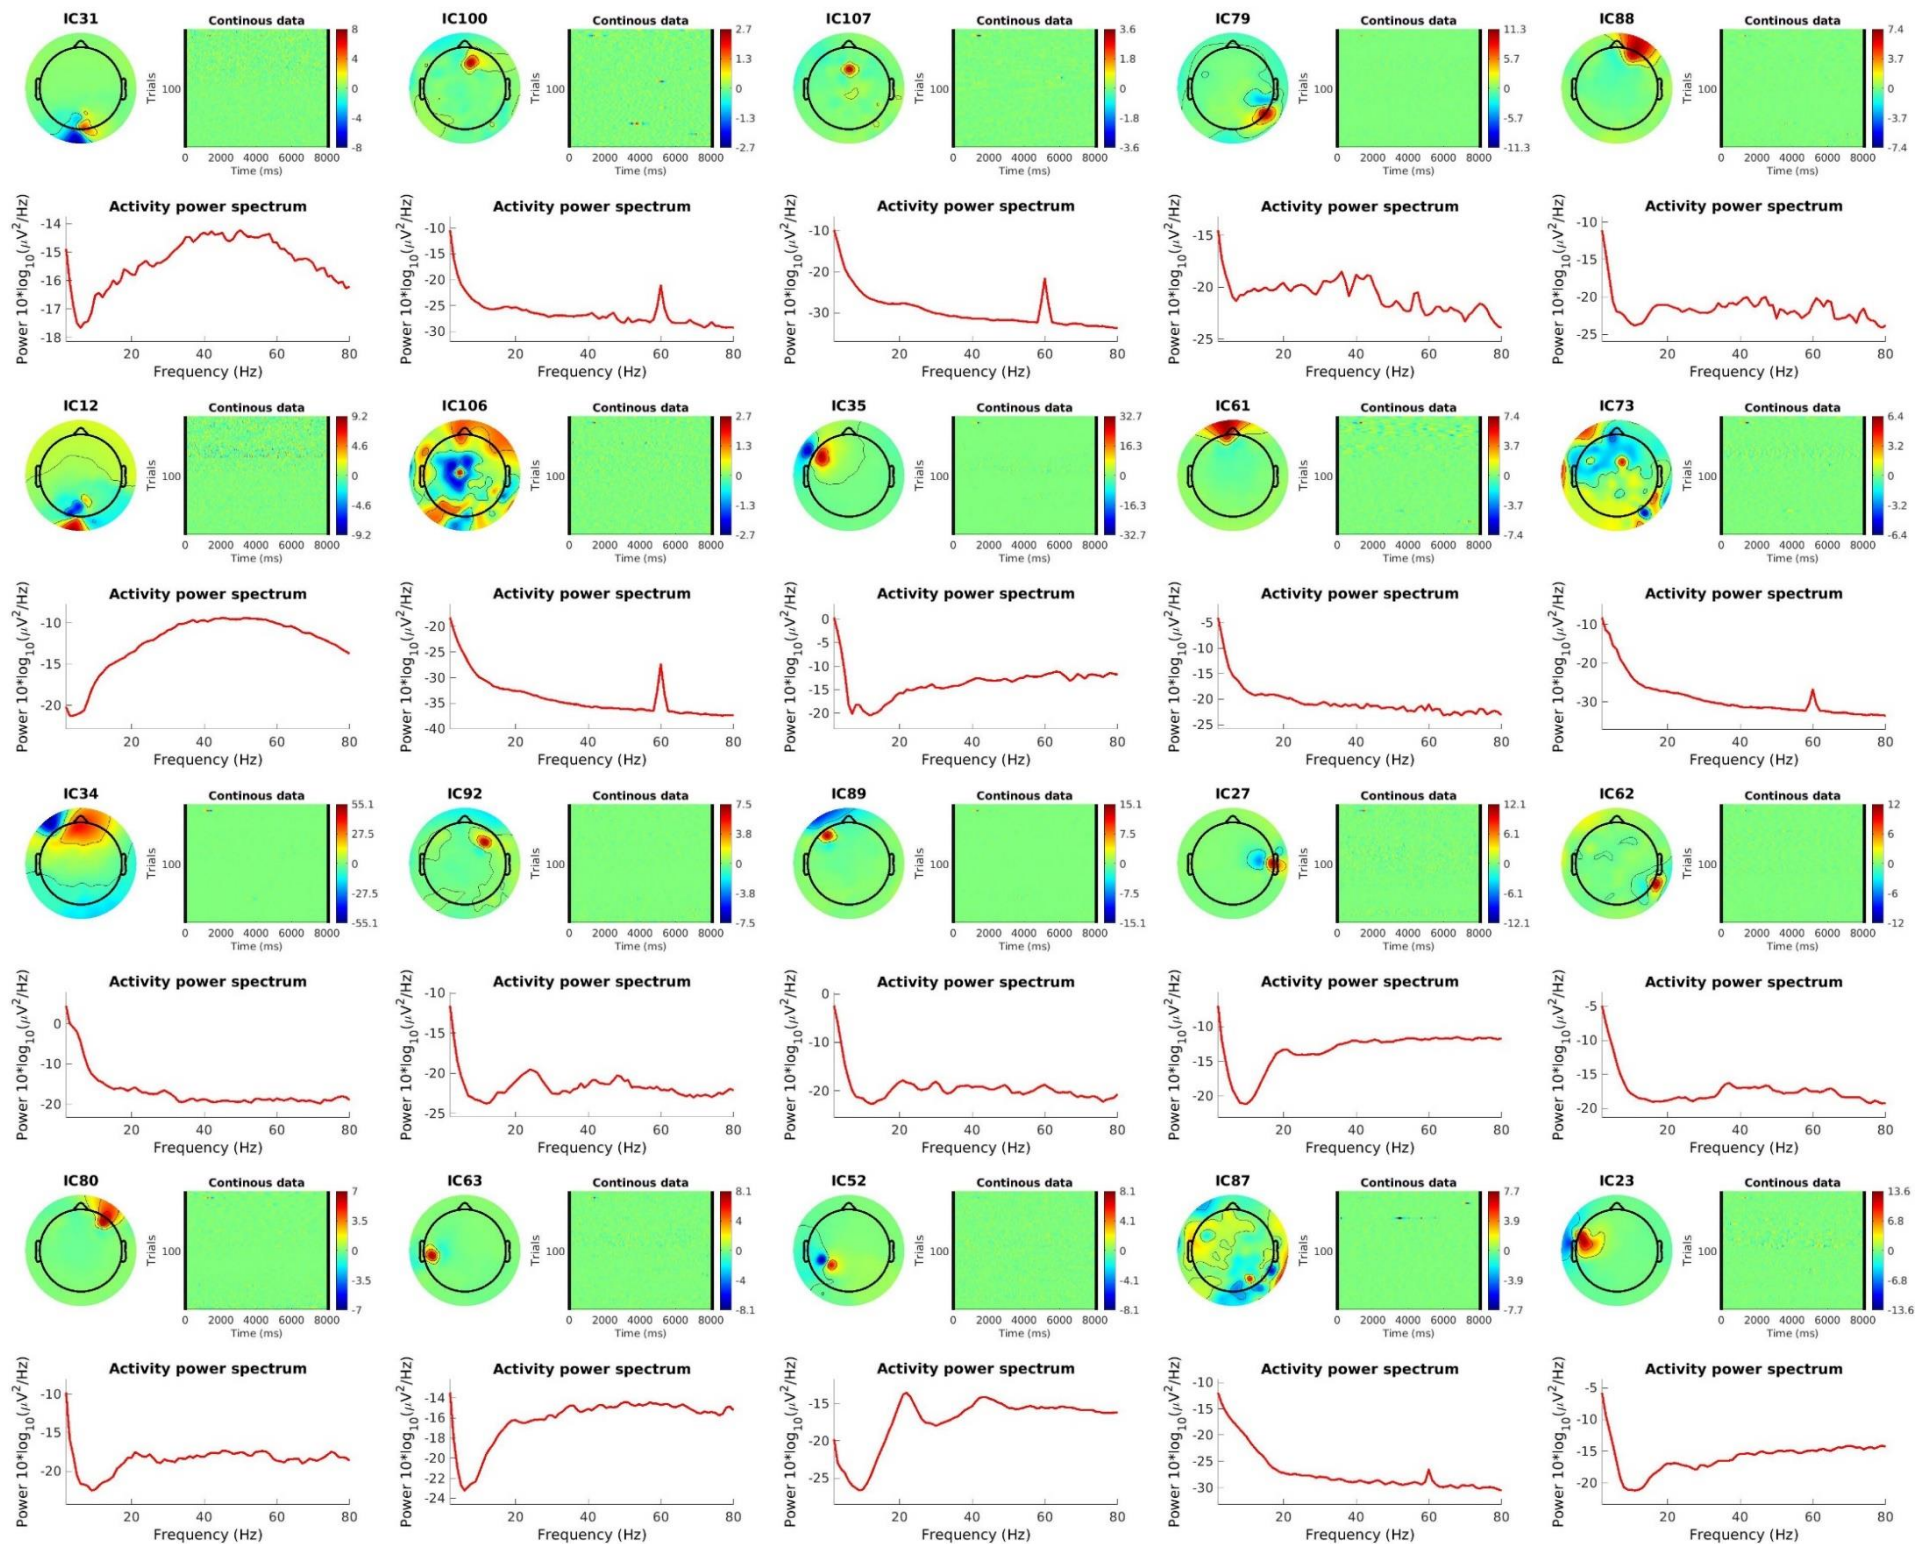

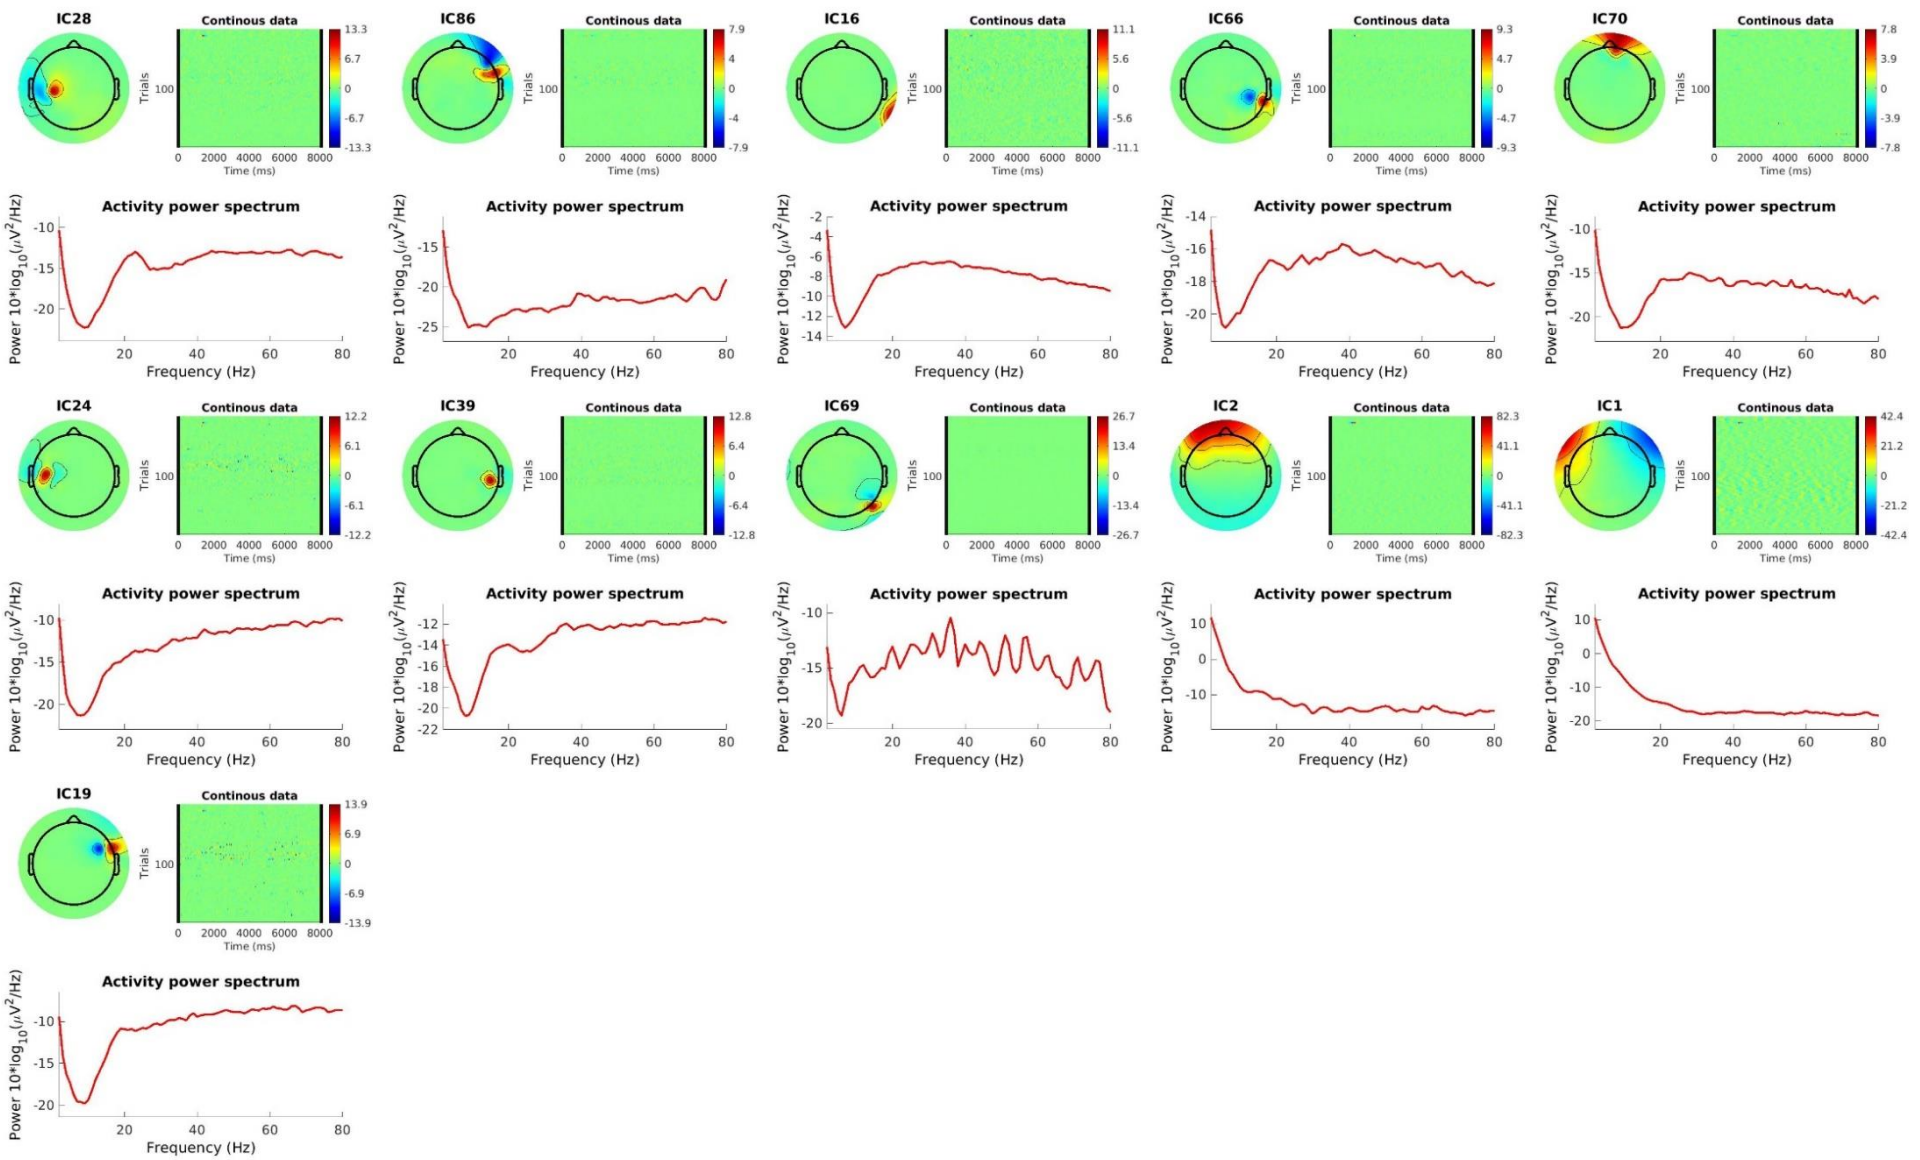



# Same Young Adult with iCanClean

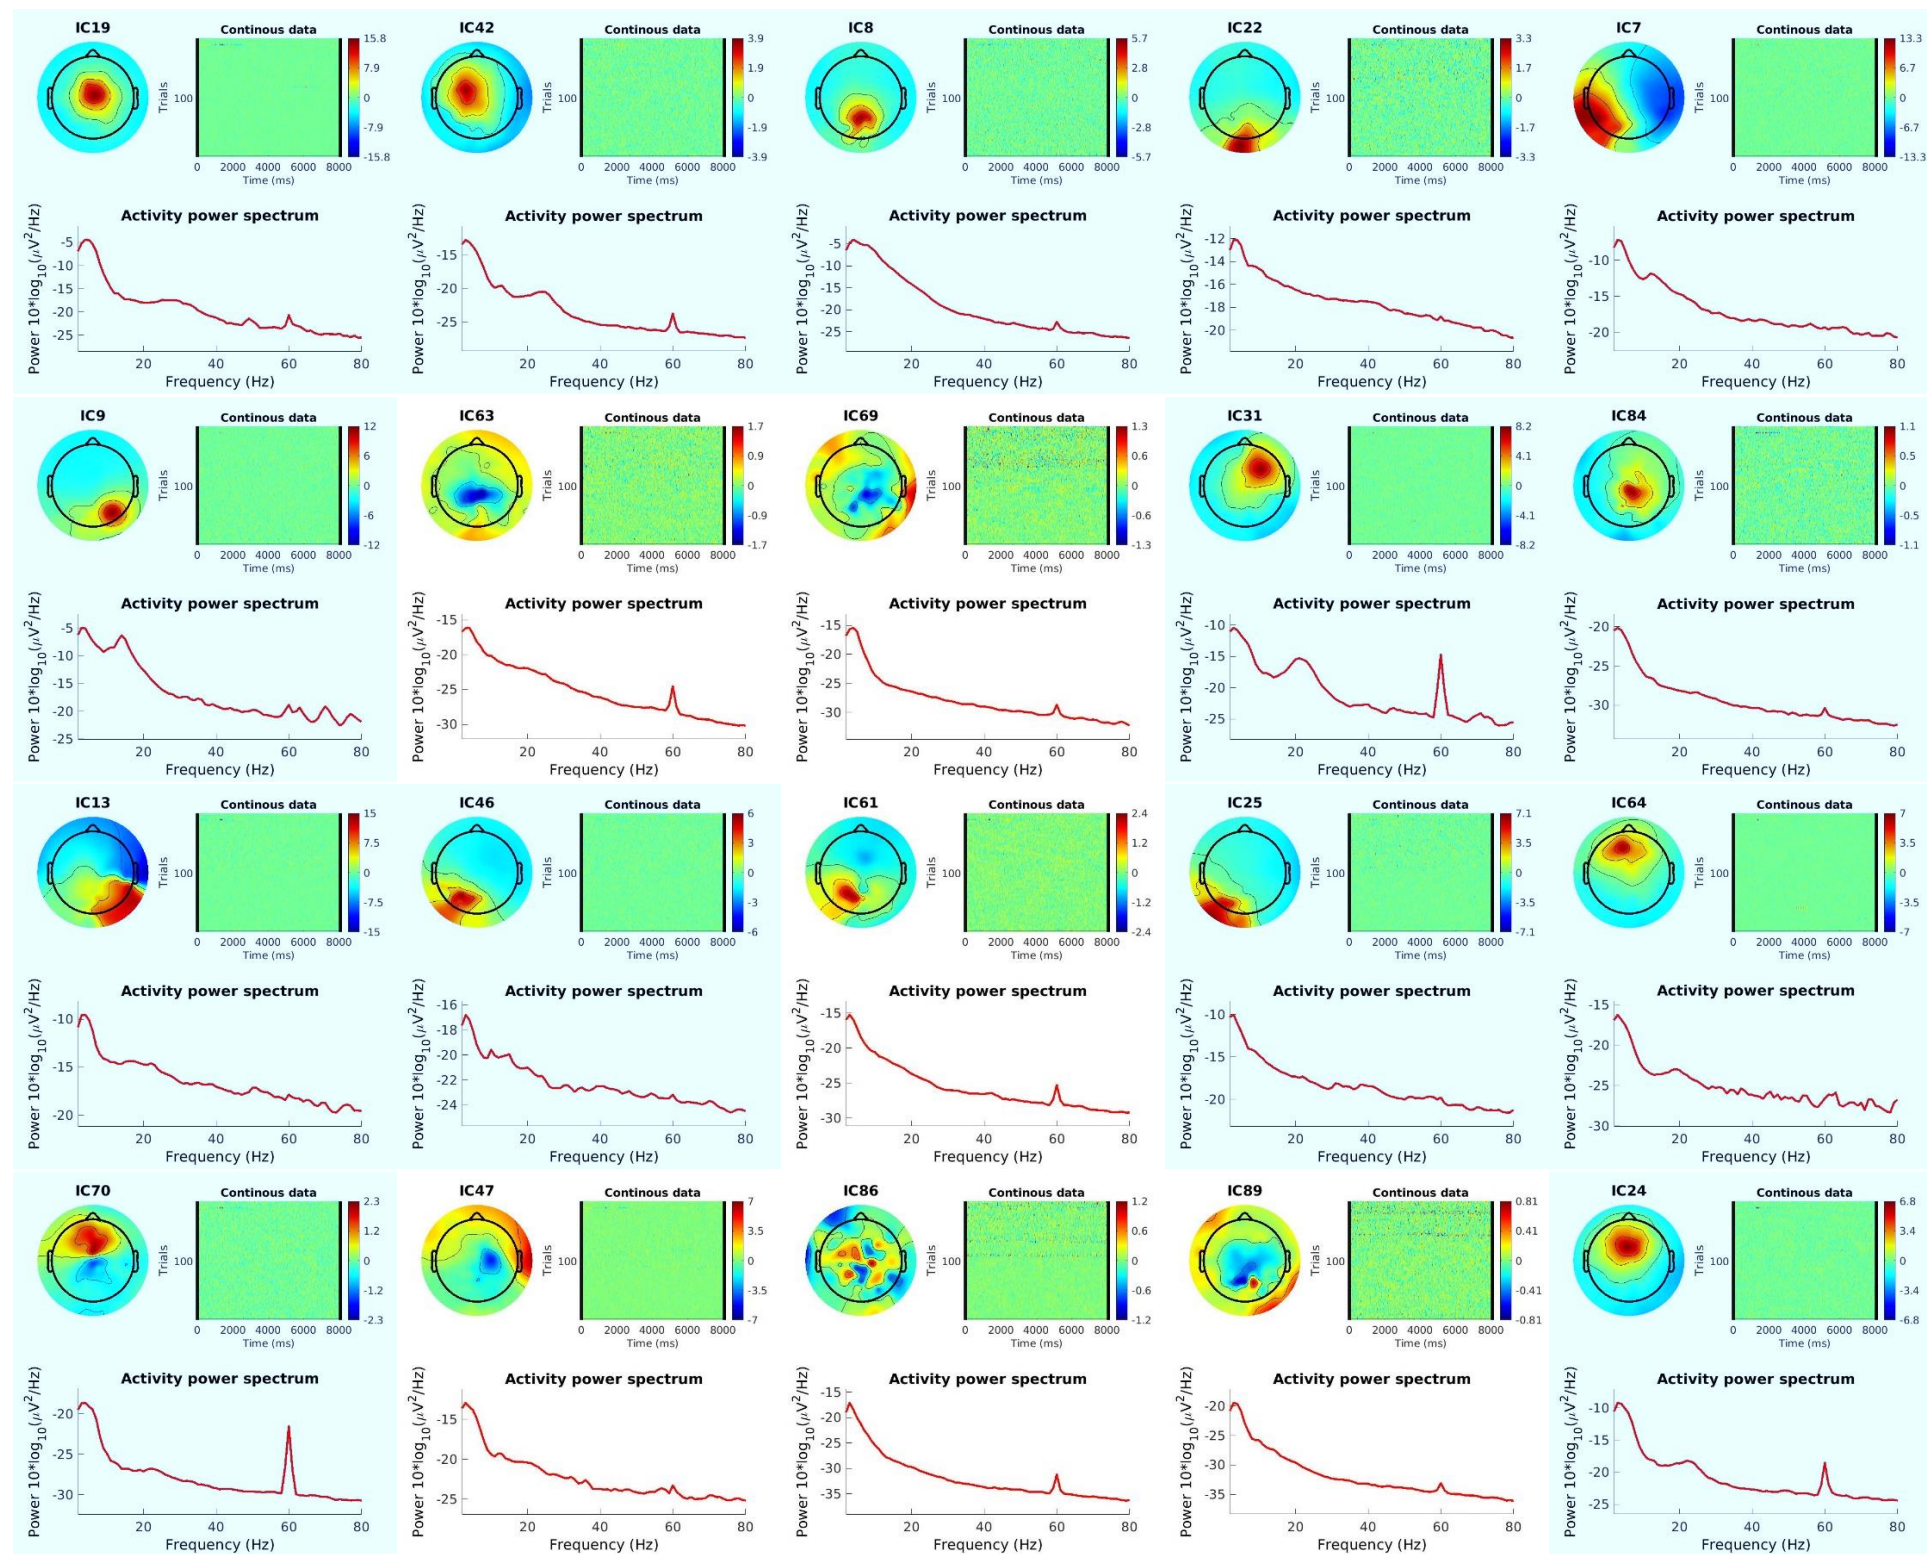

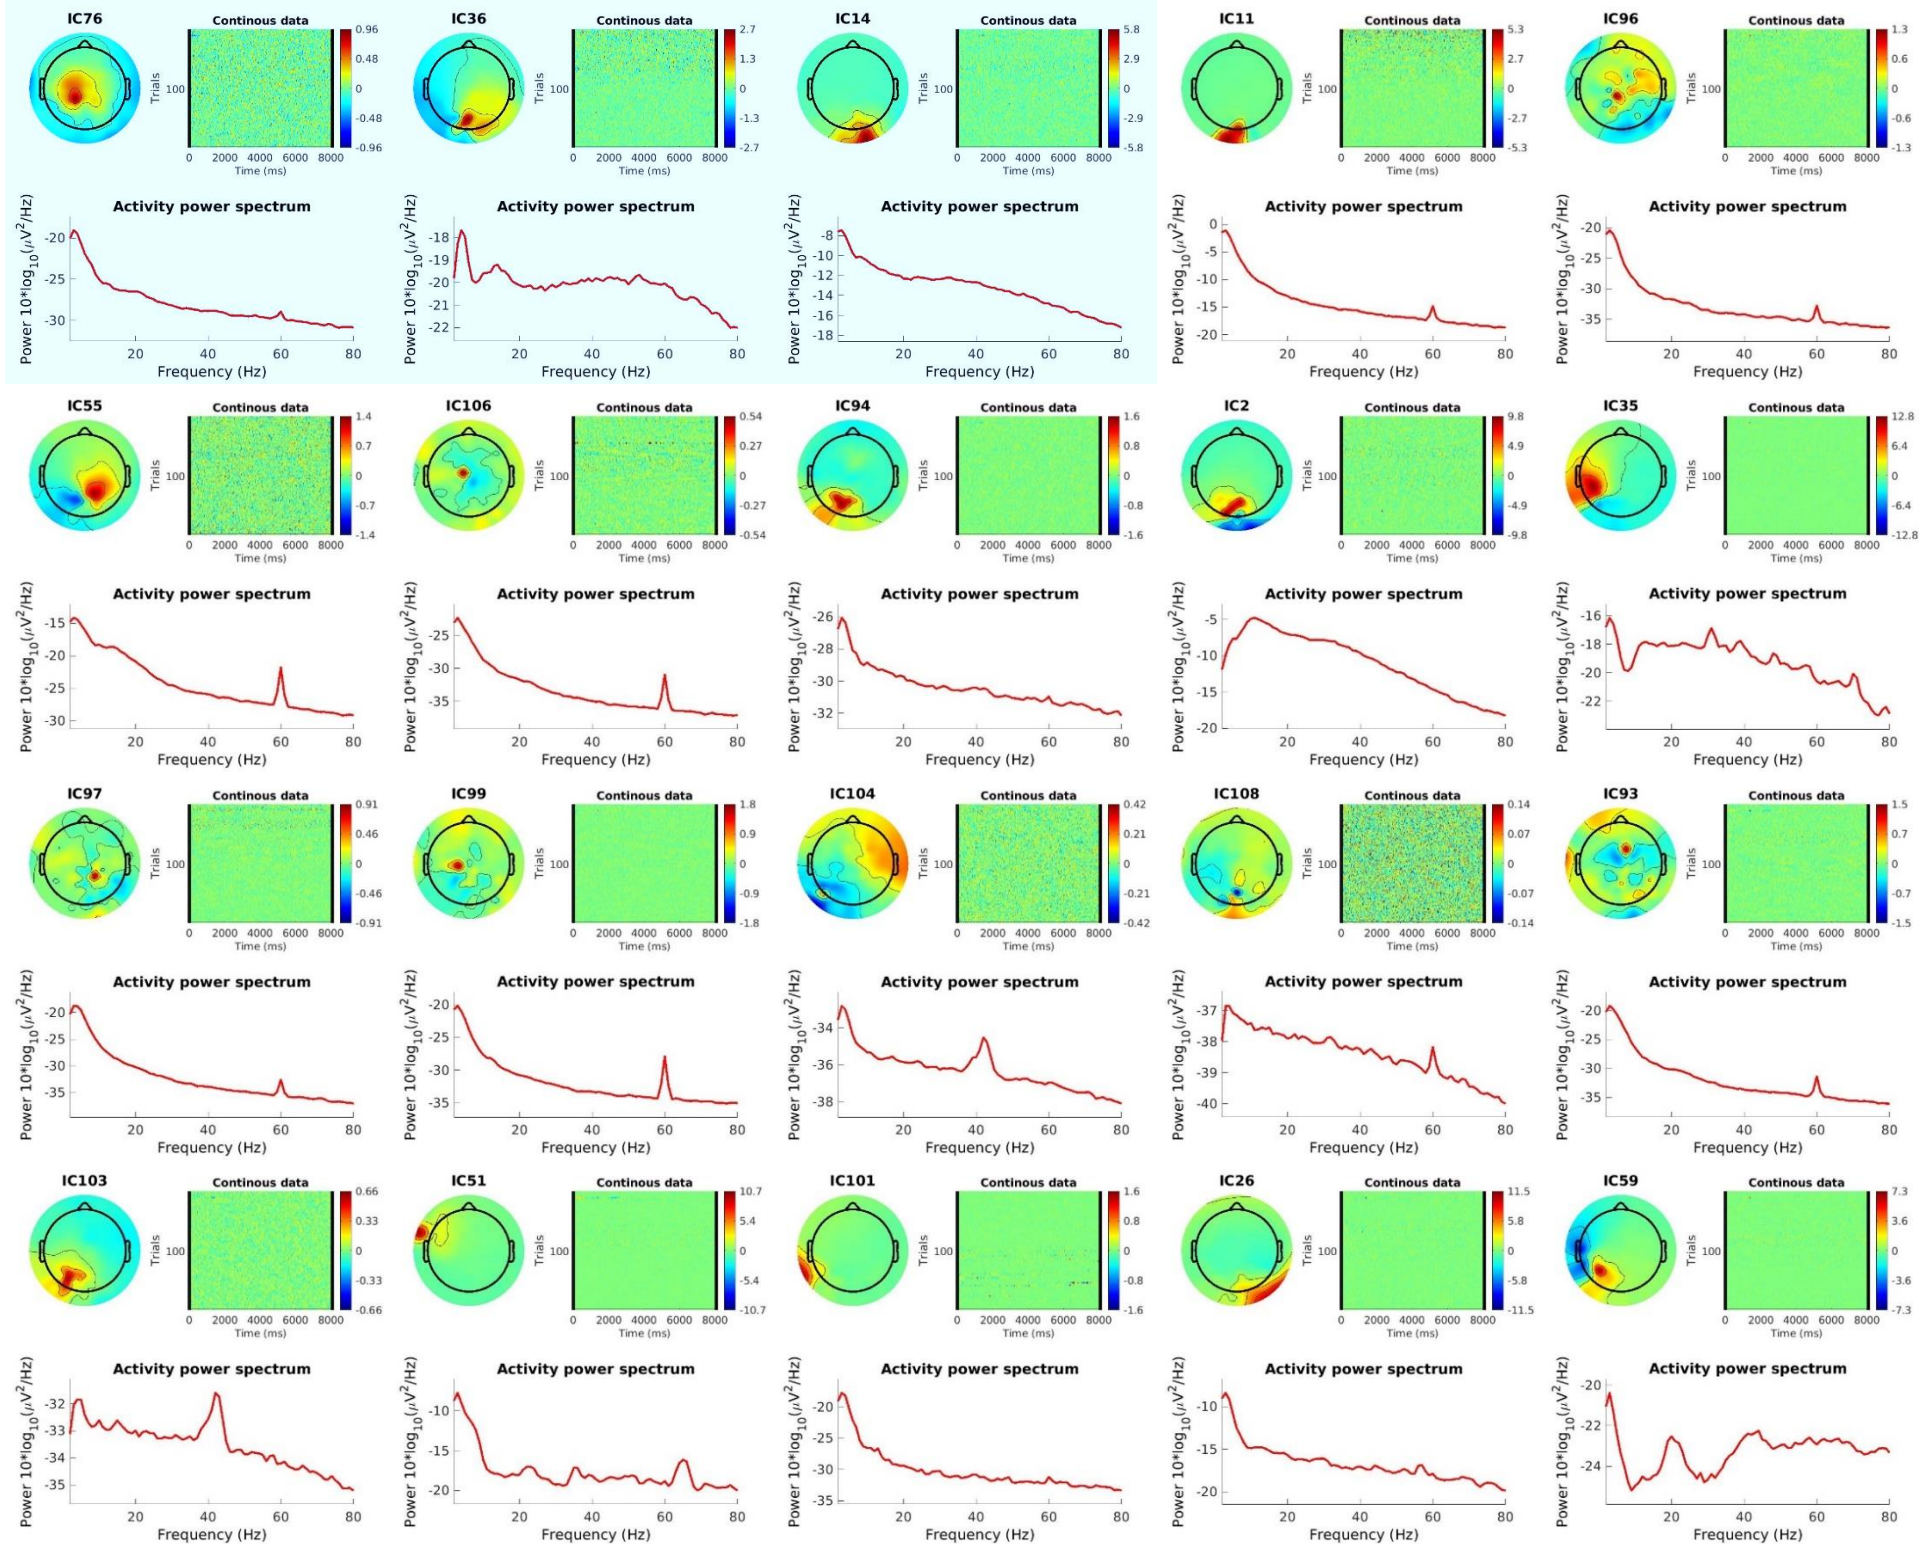



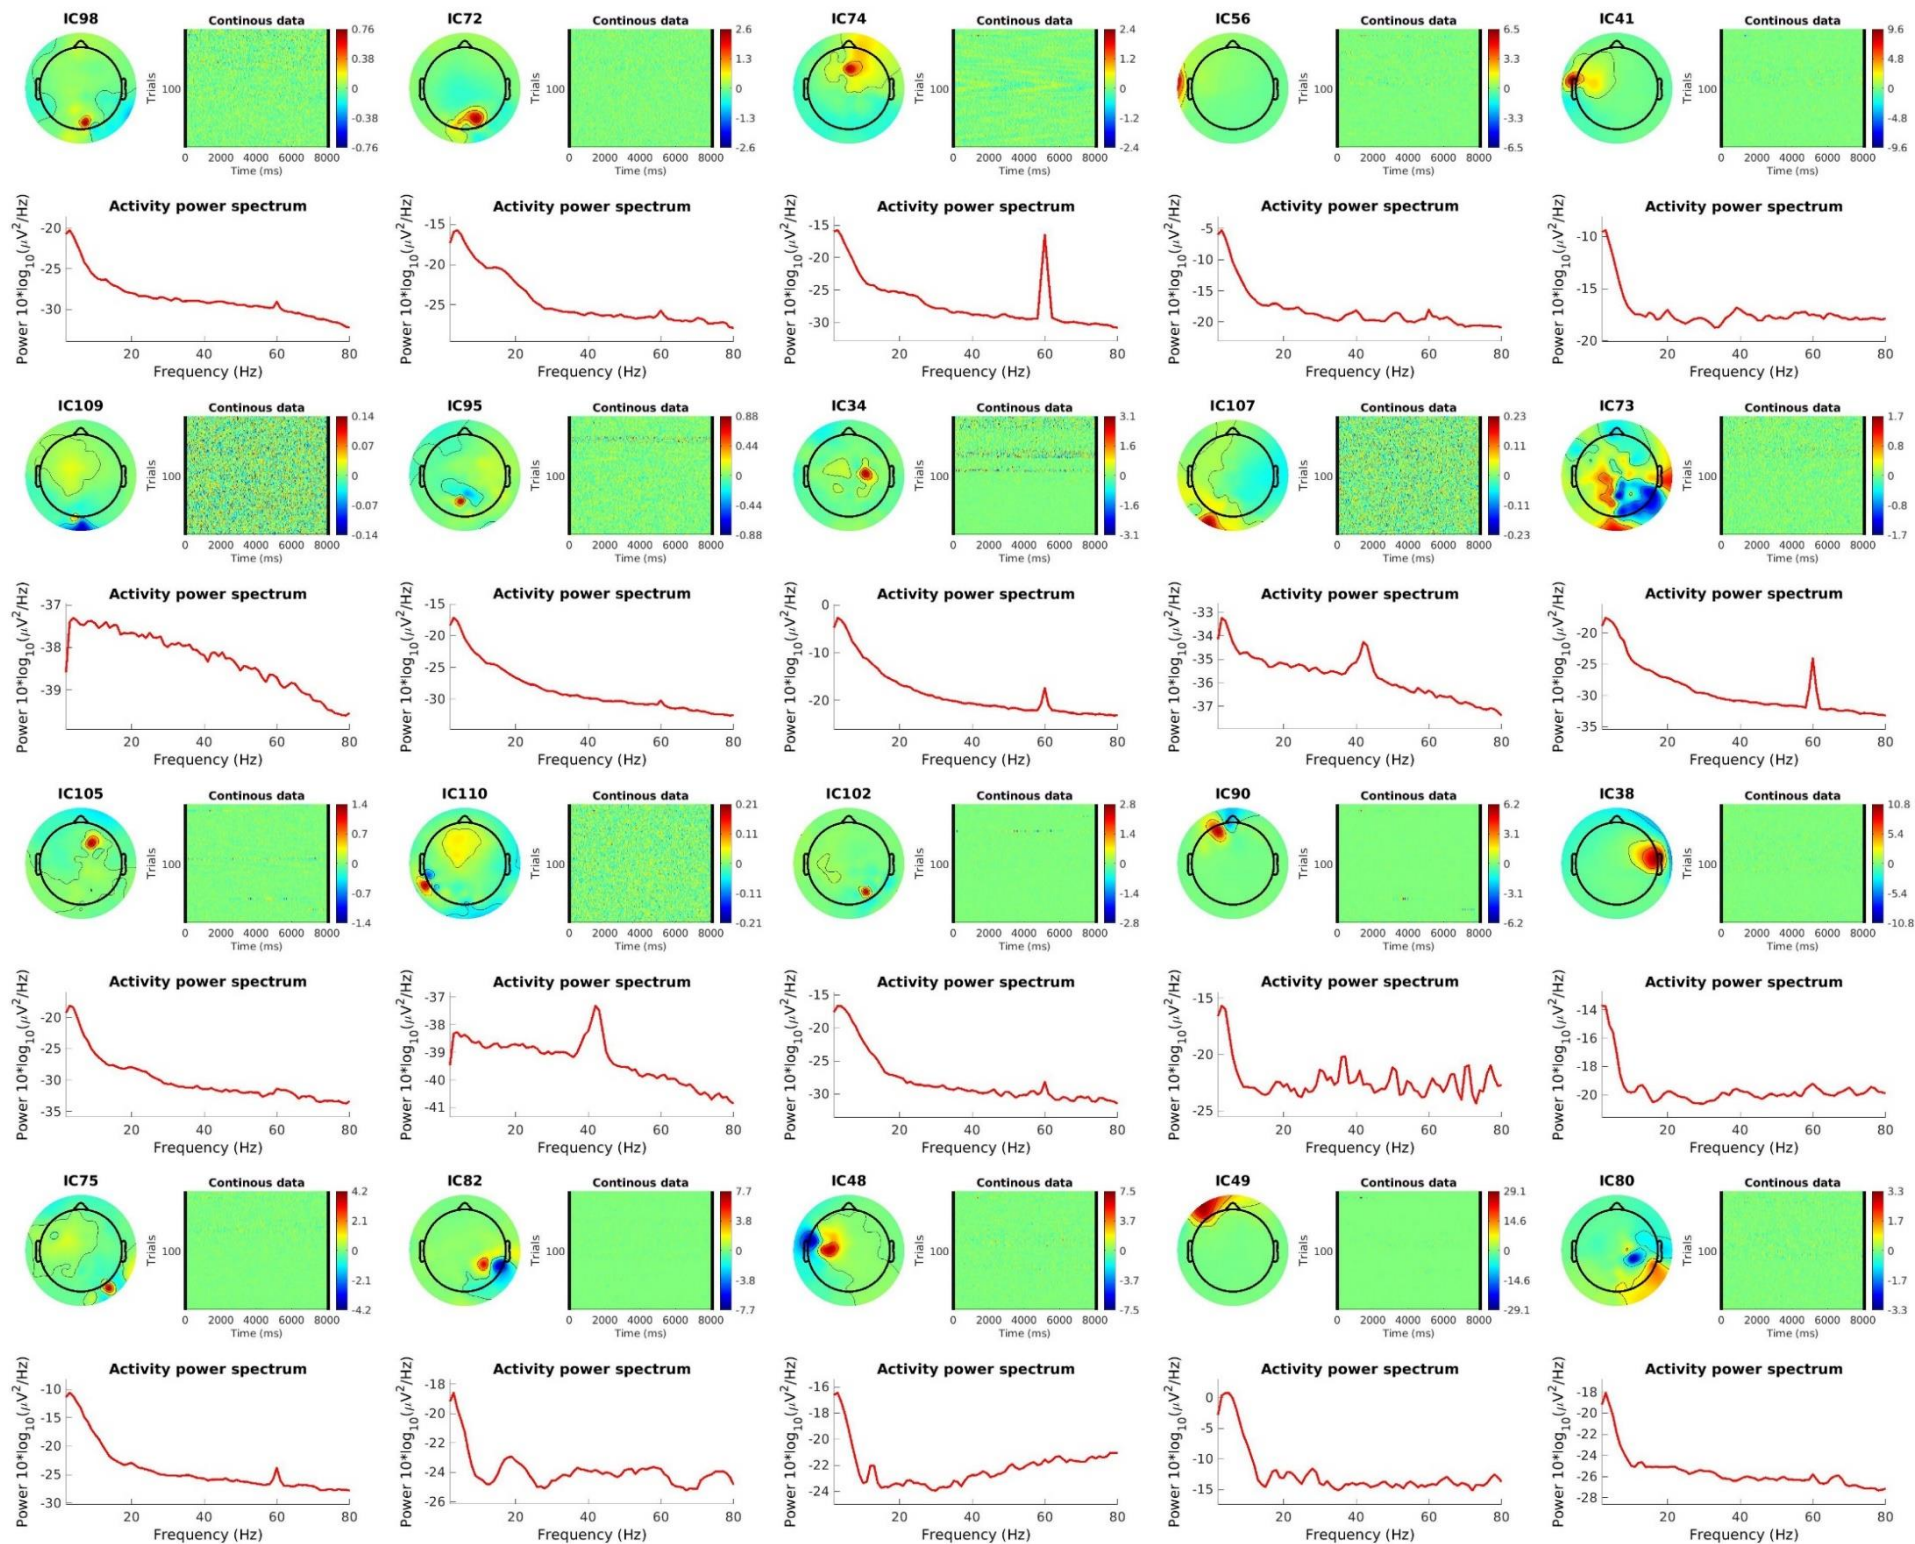

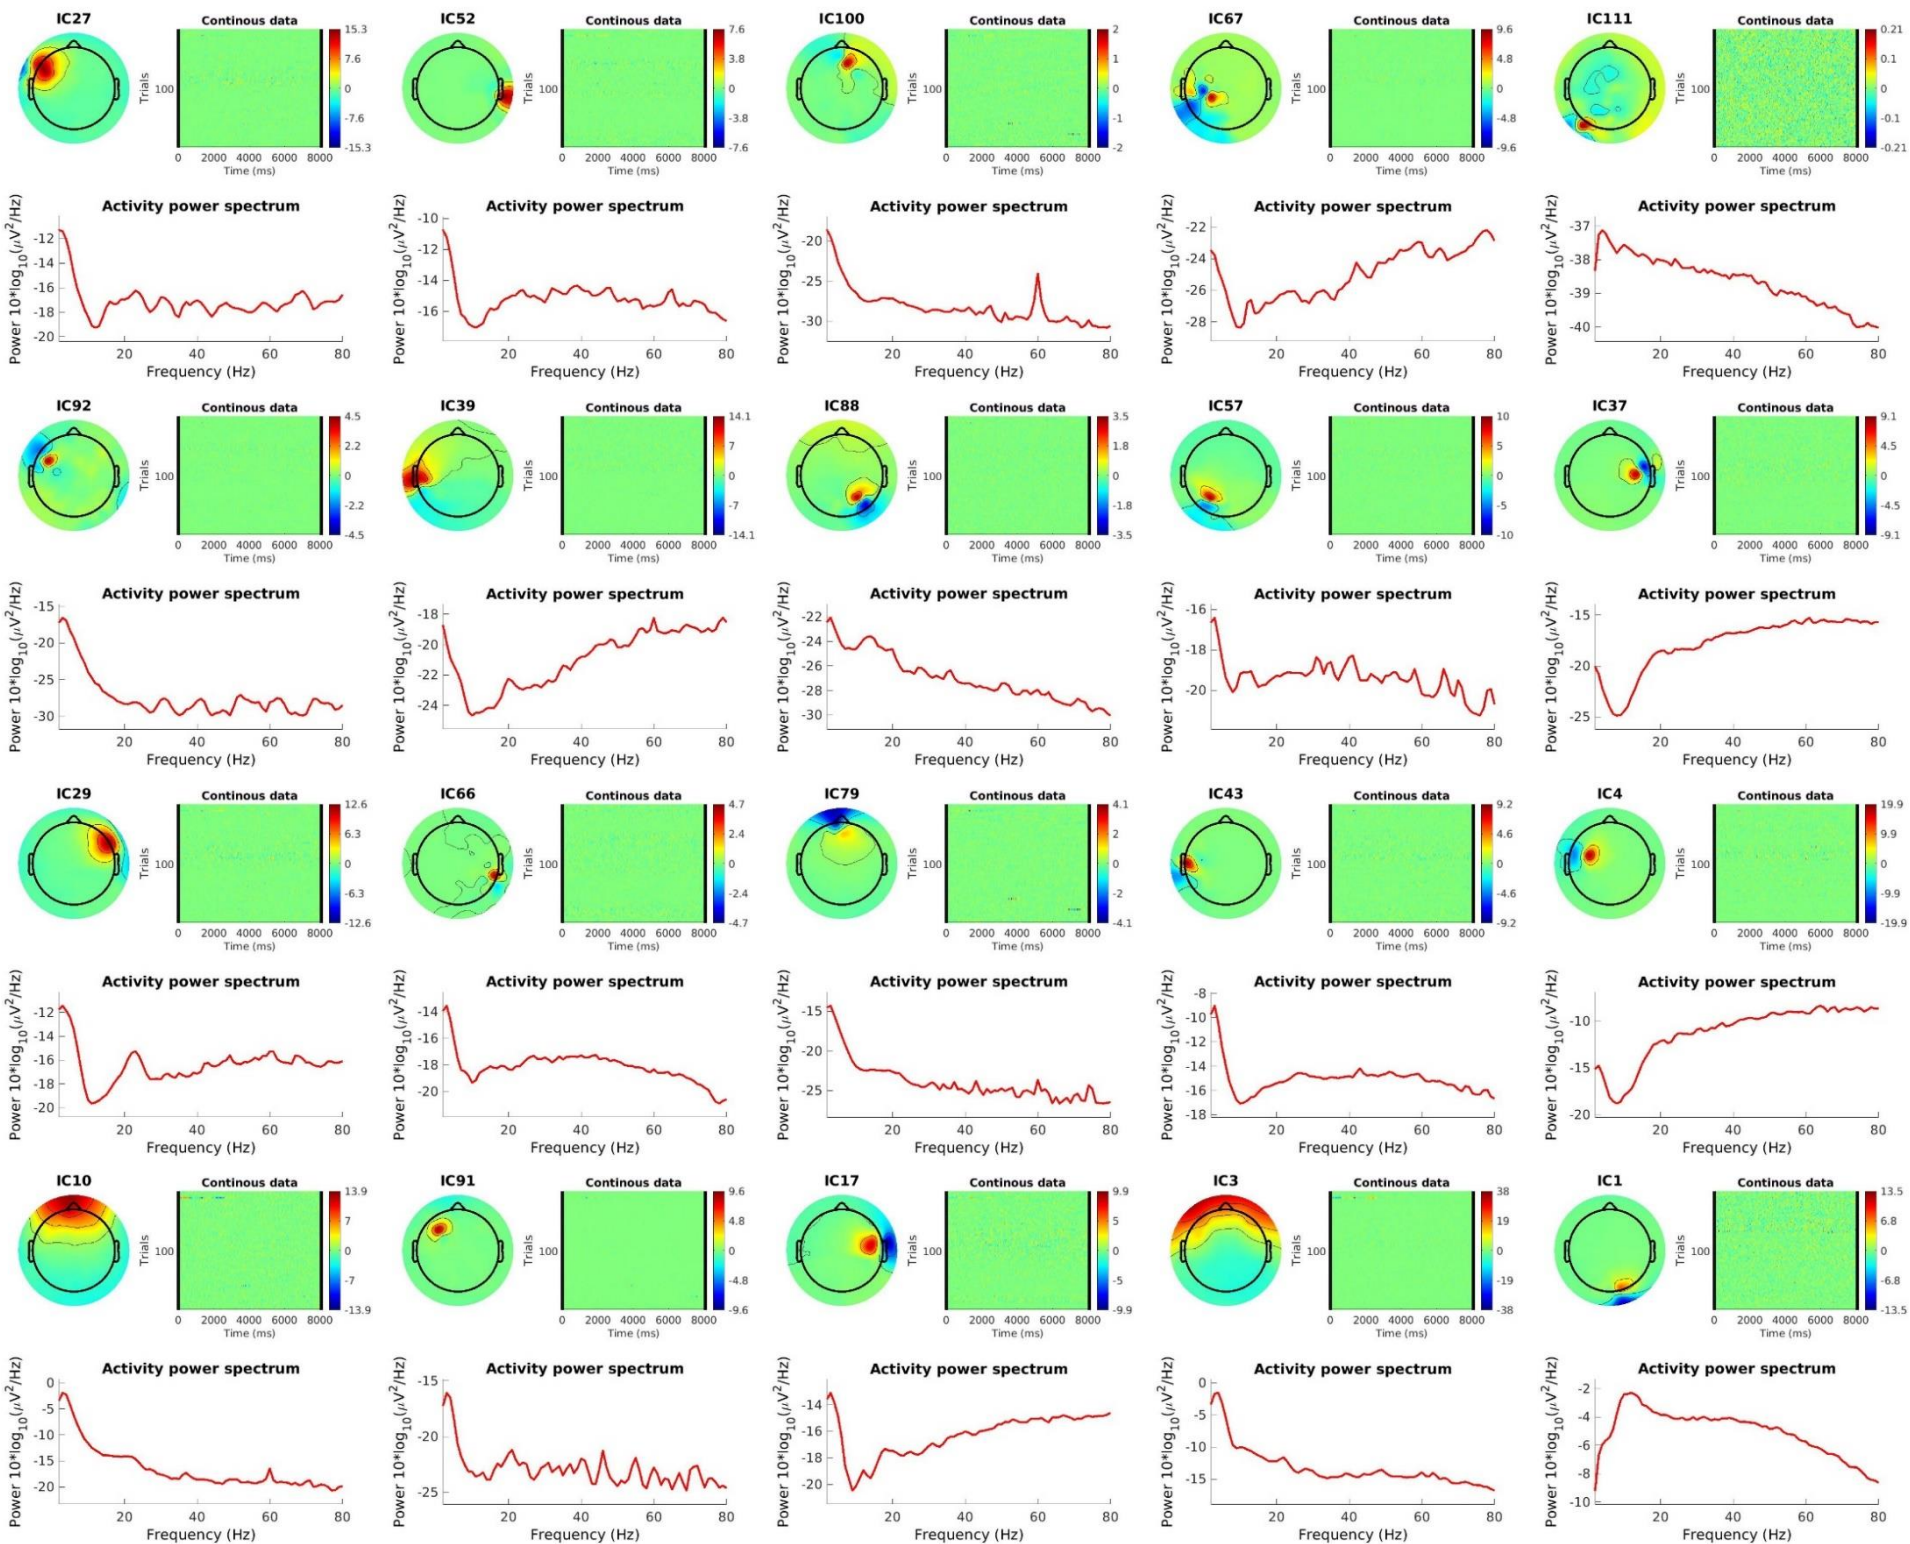



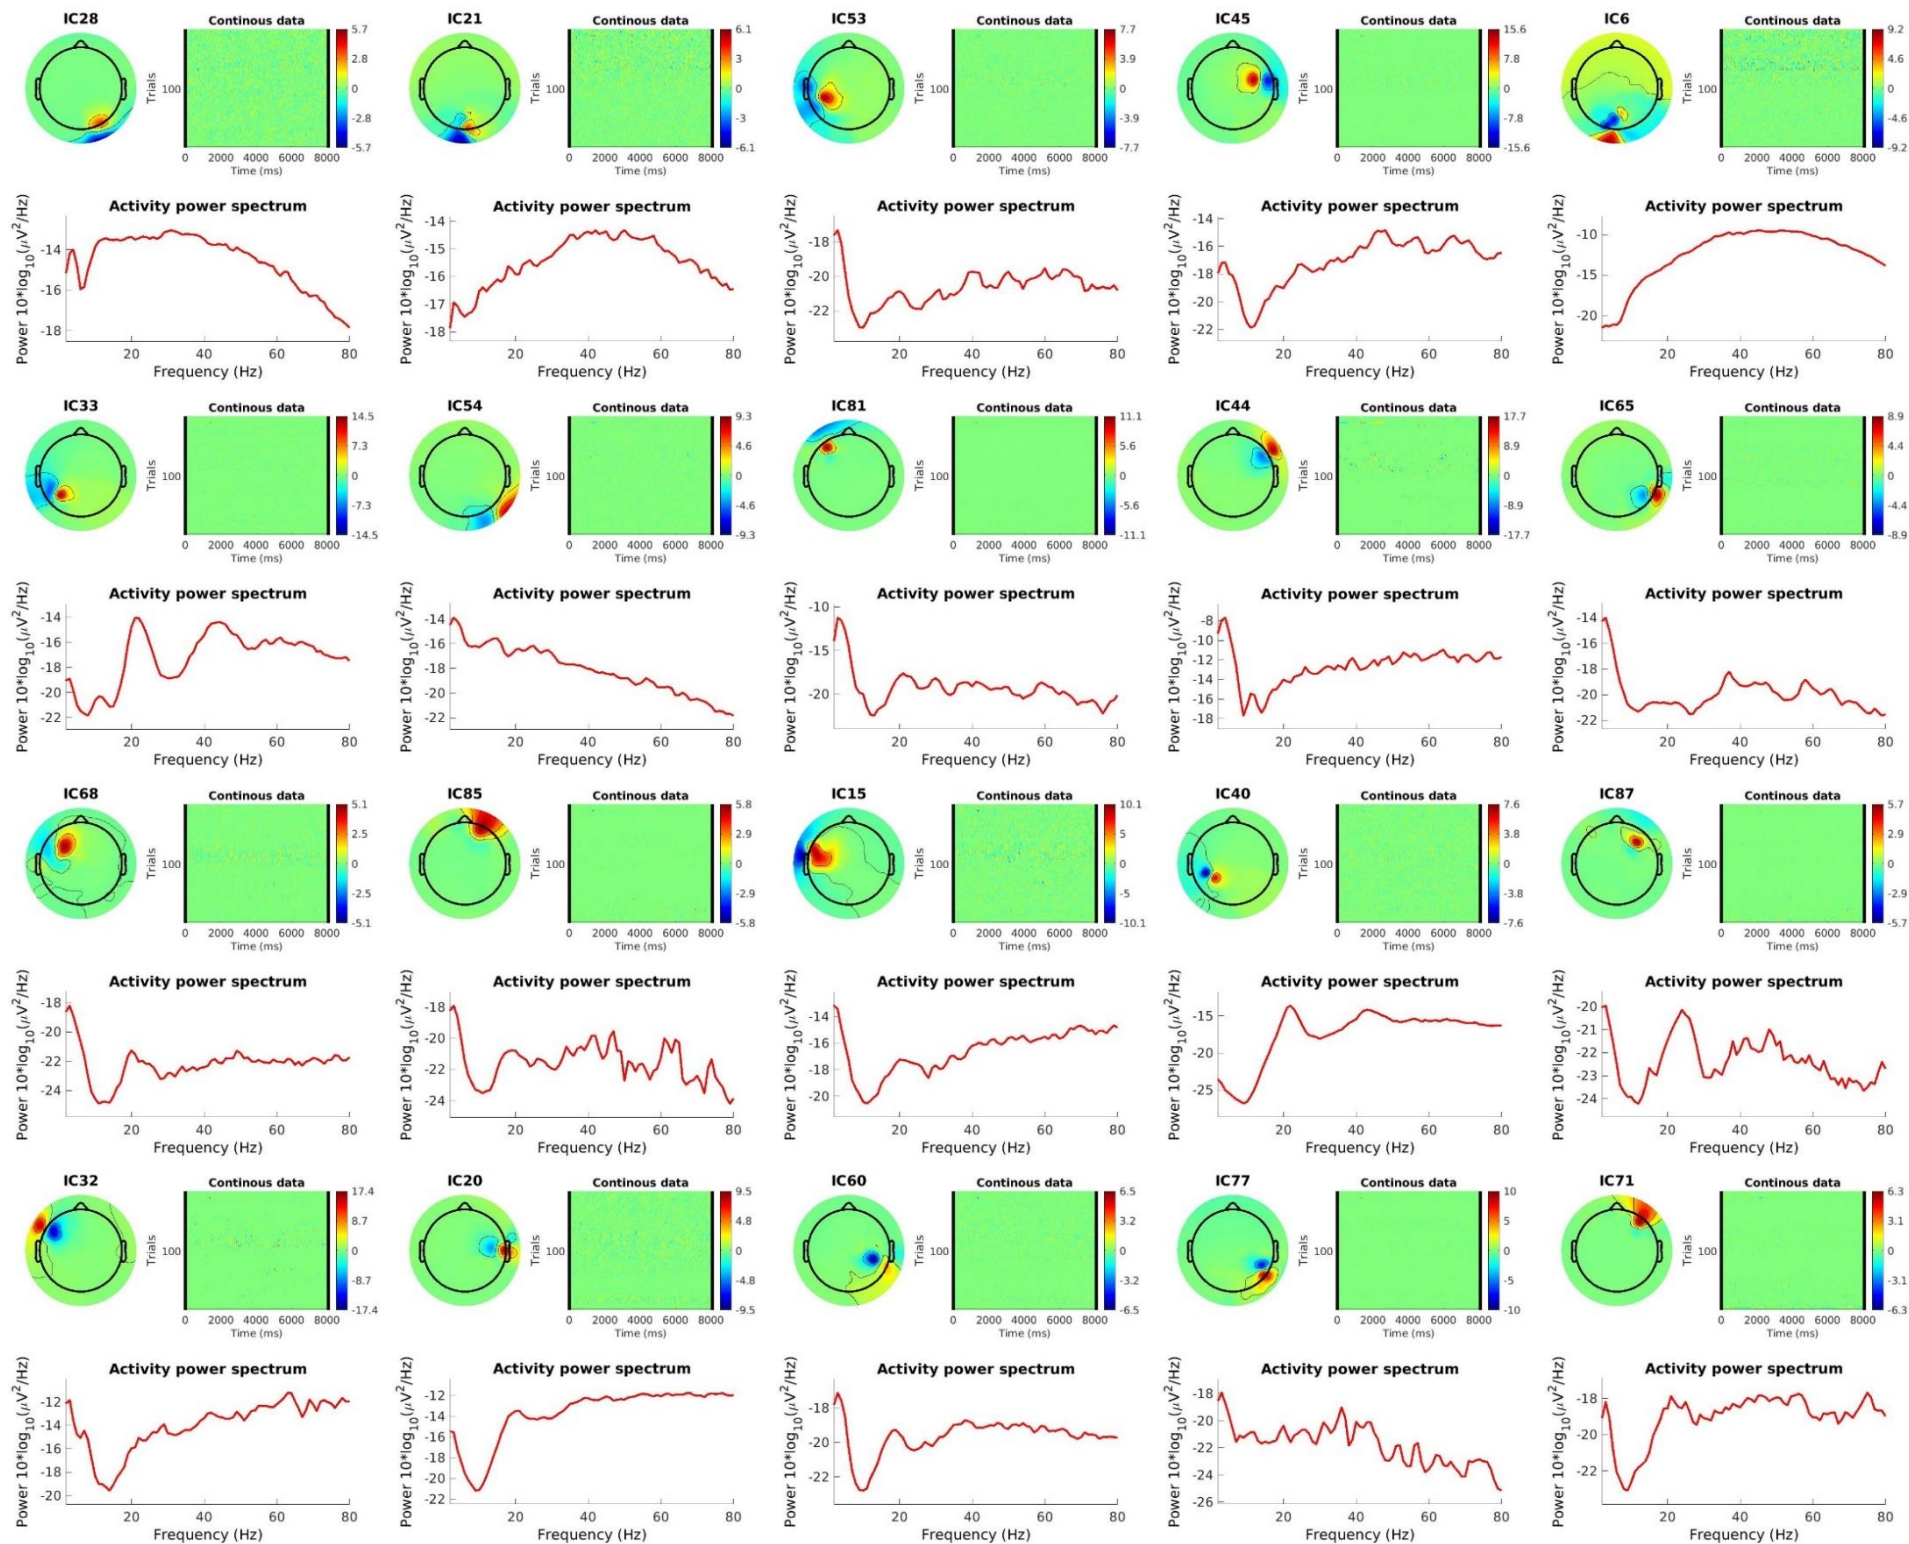

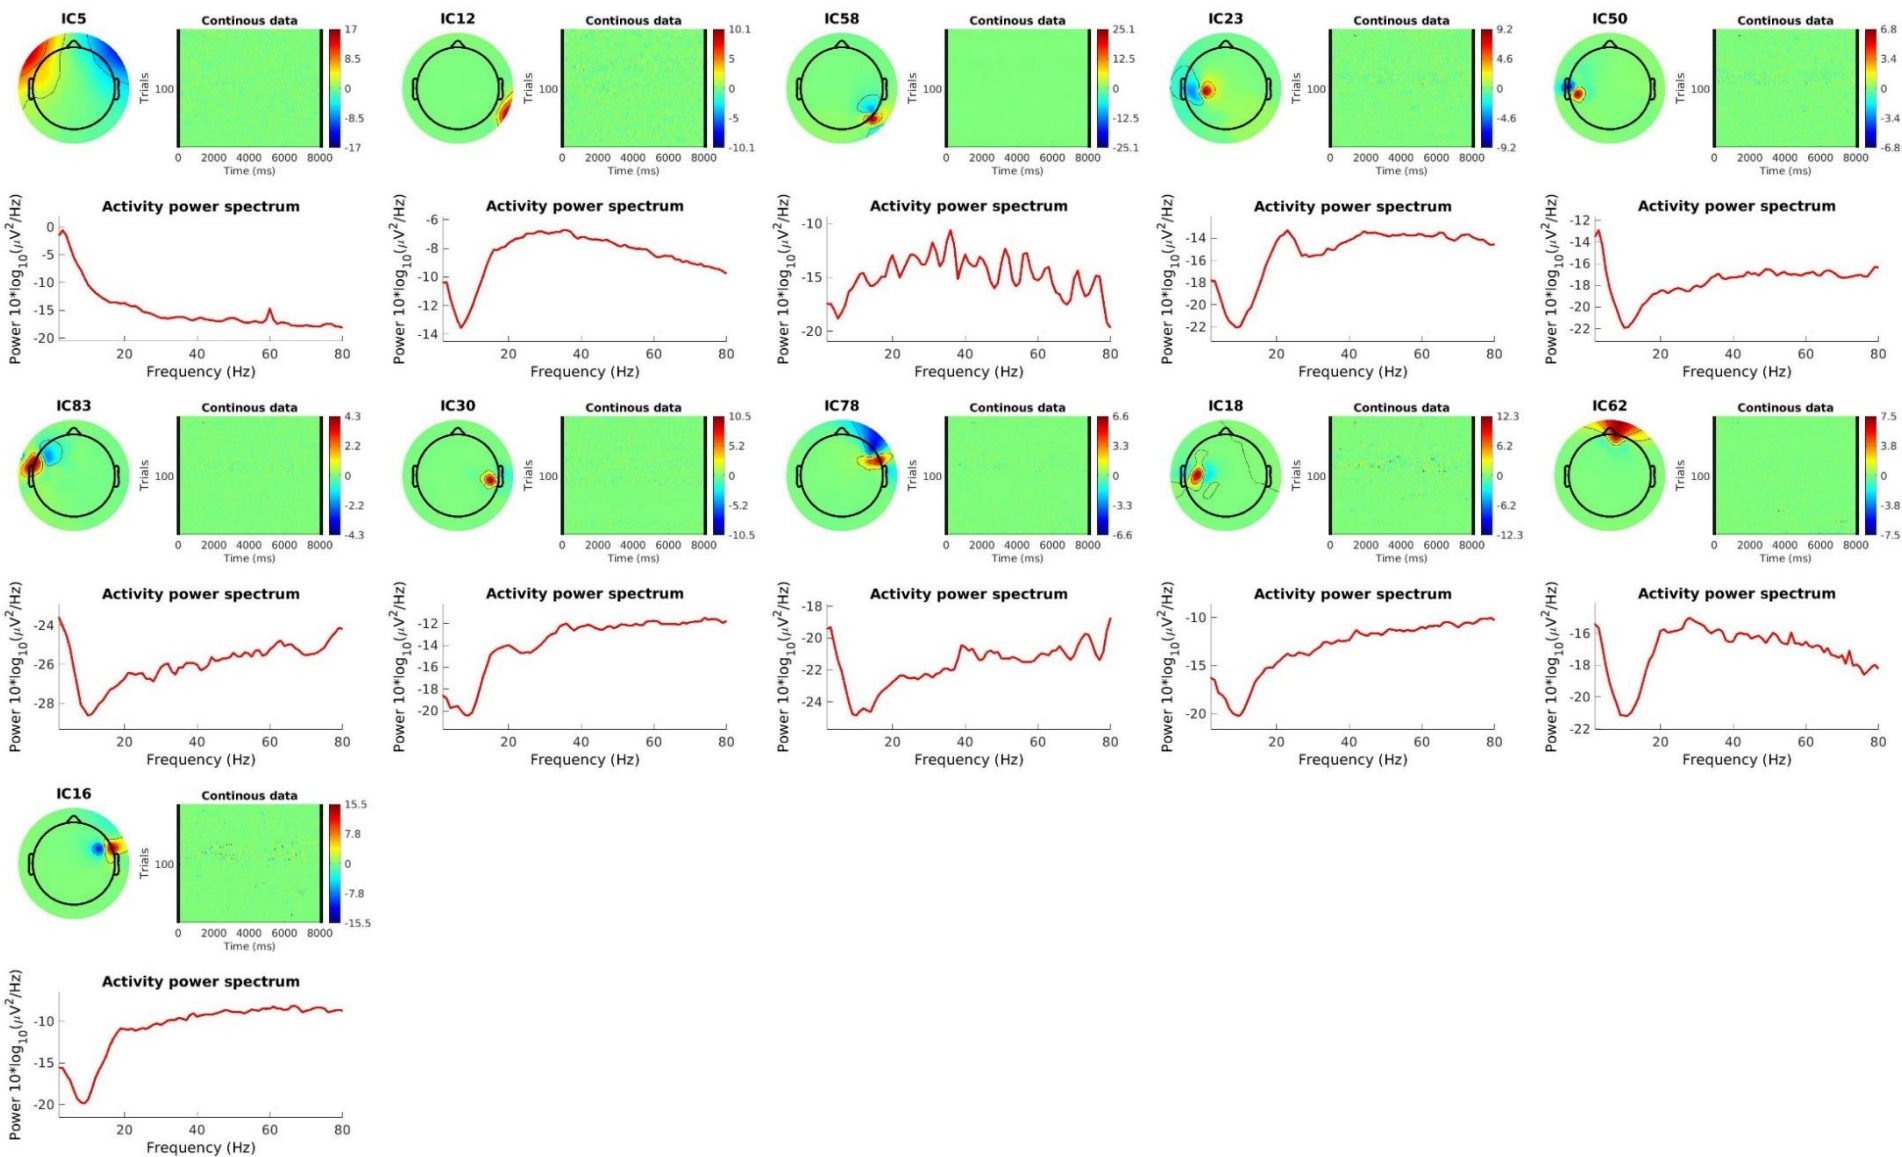



# High Functioning Older Adult Without iCanClean

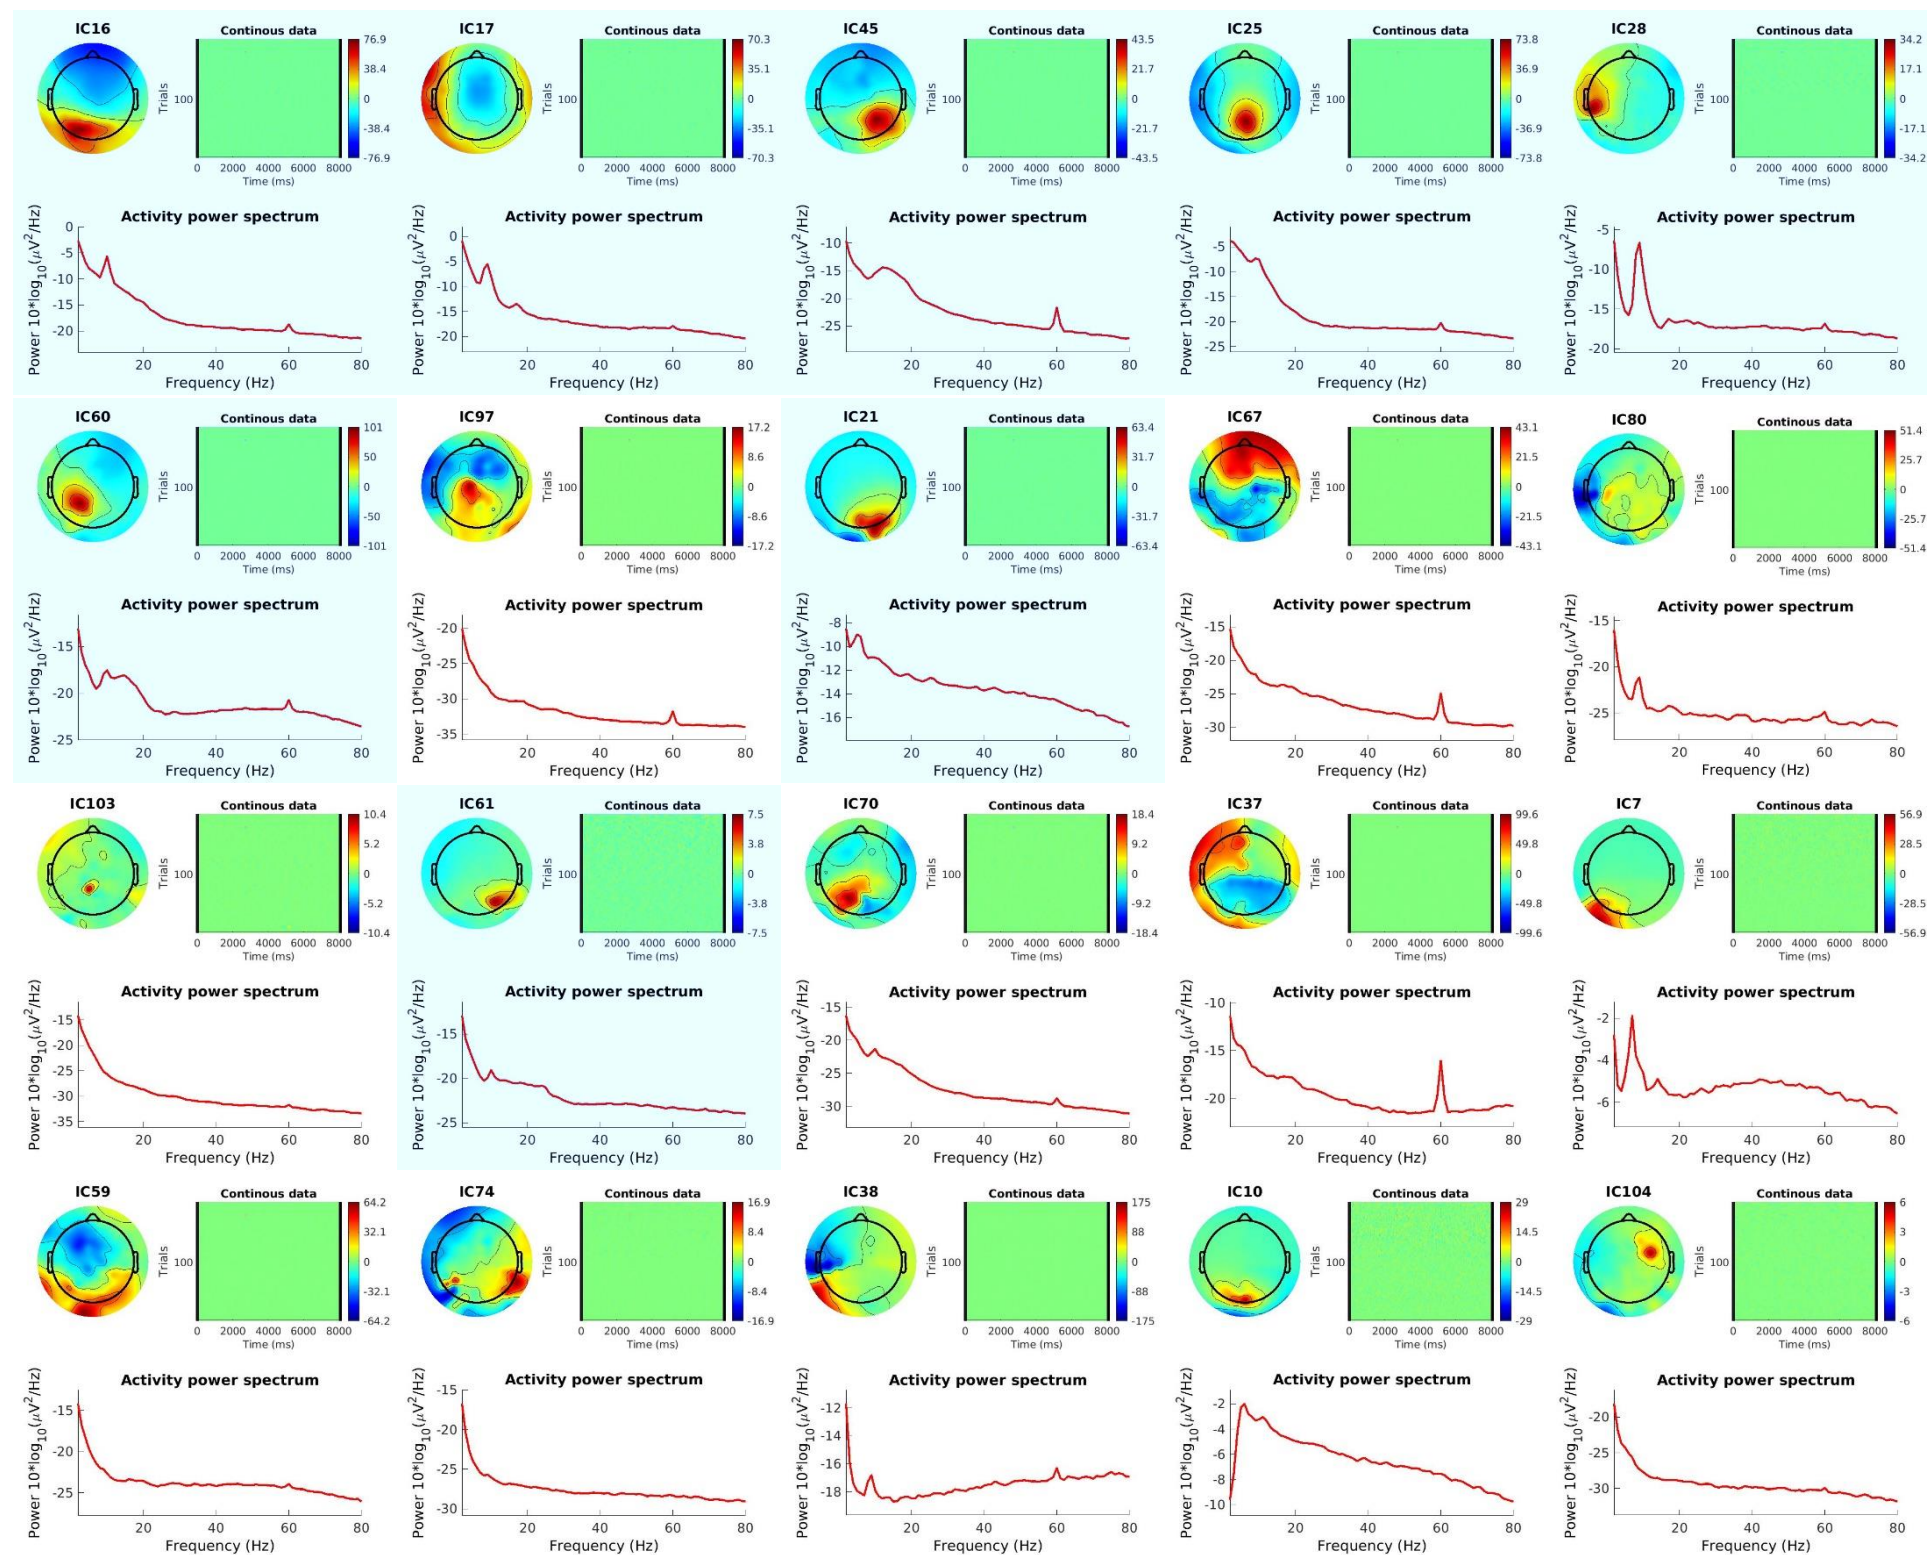

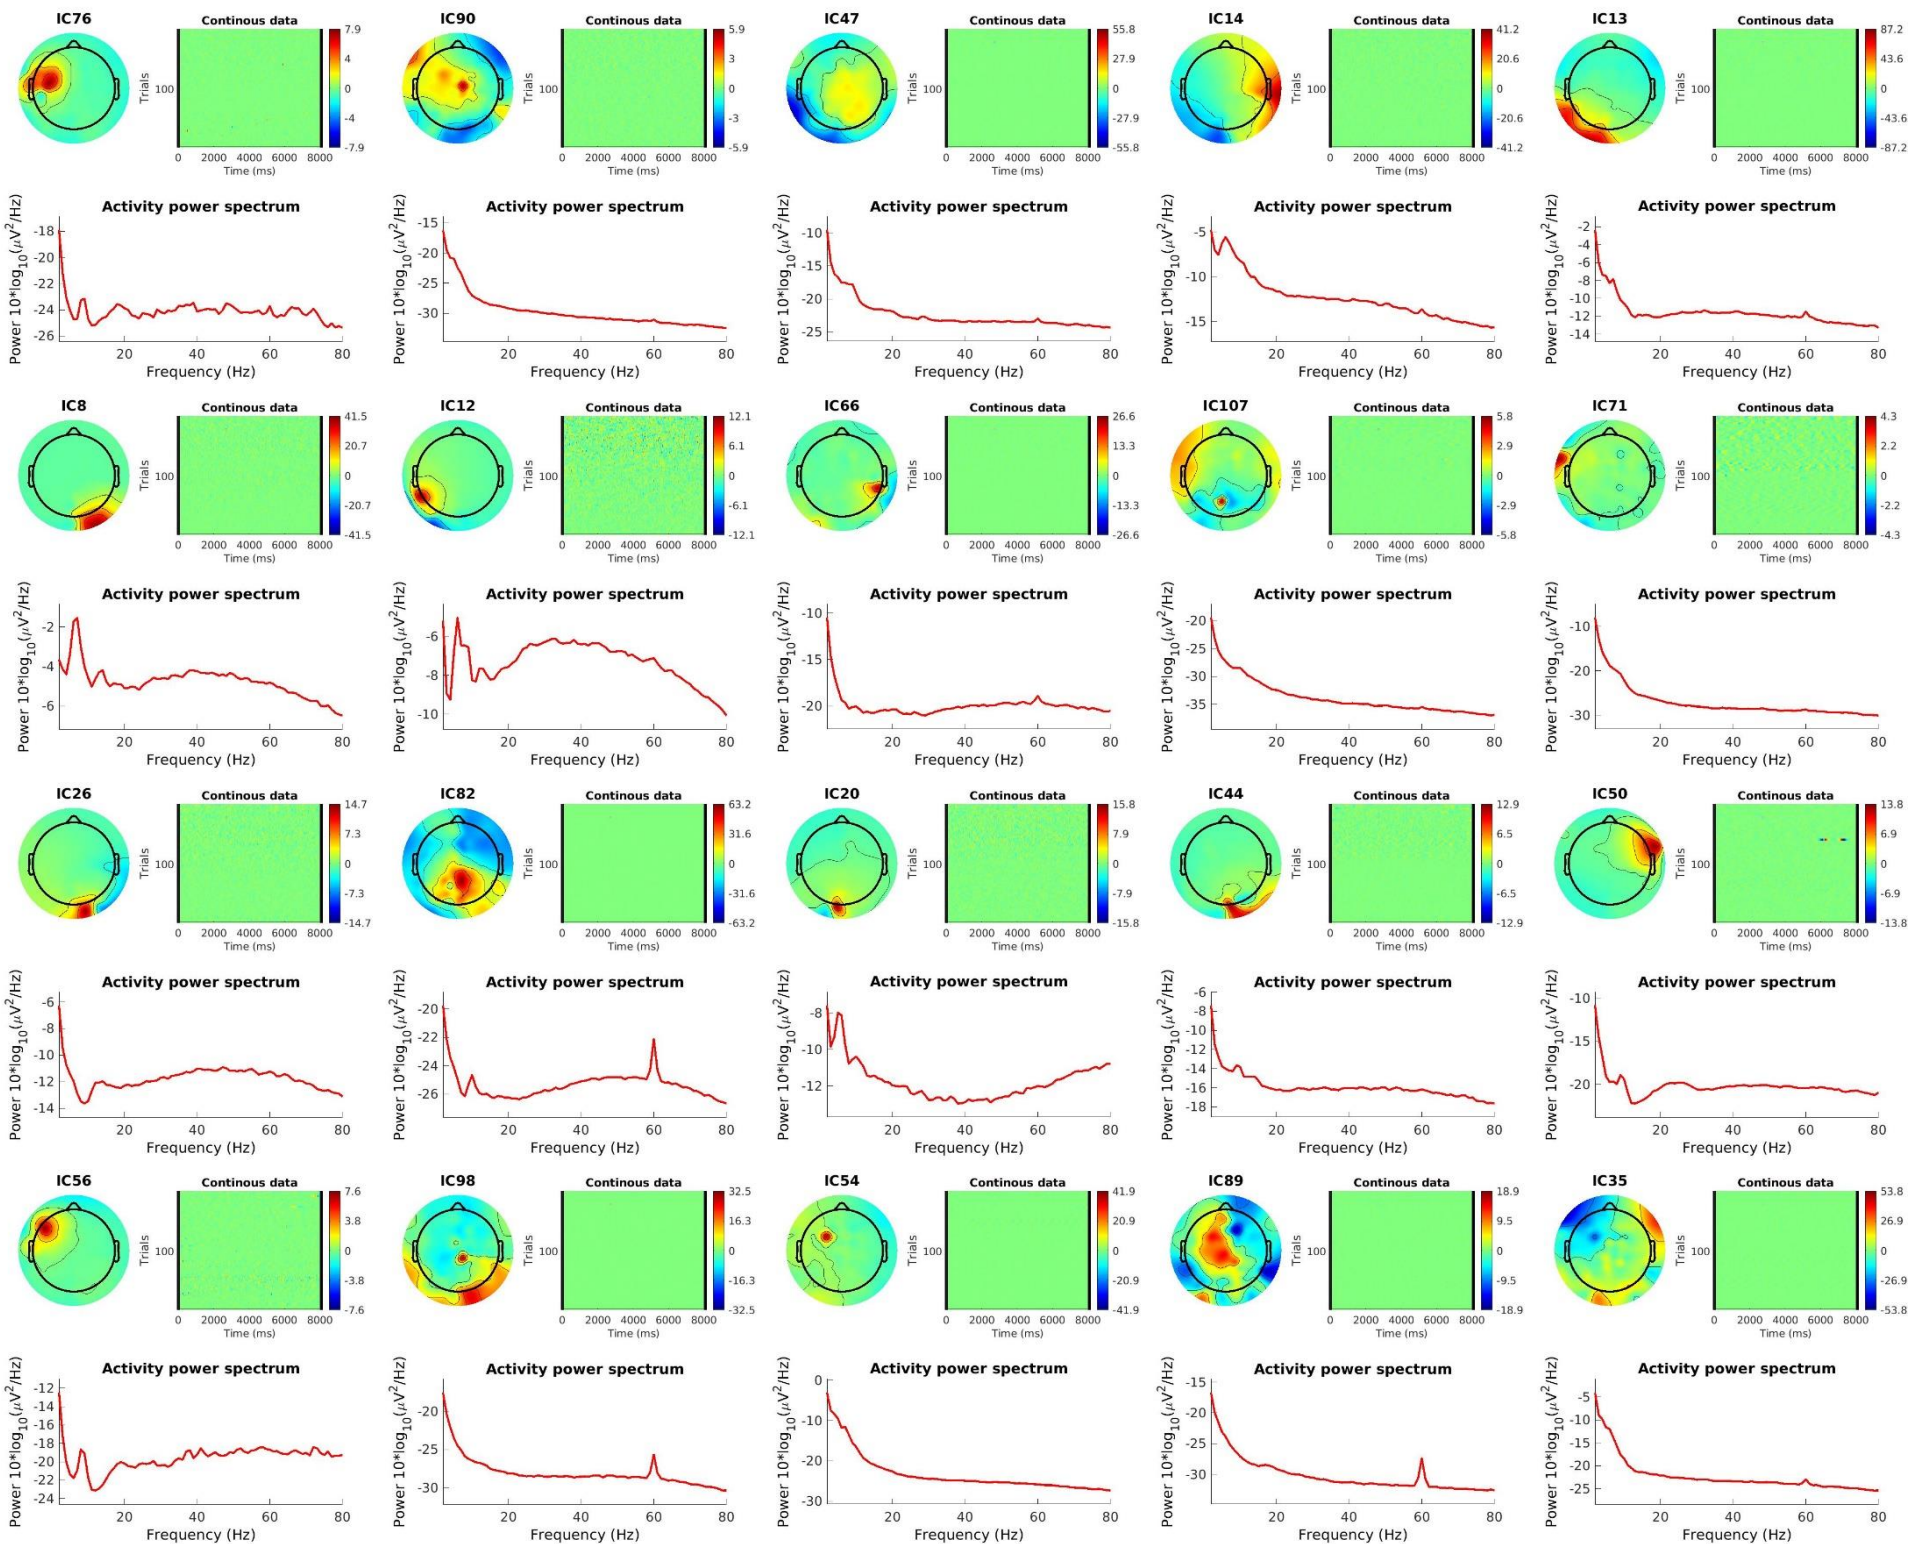



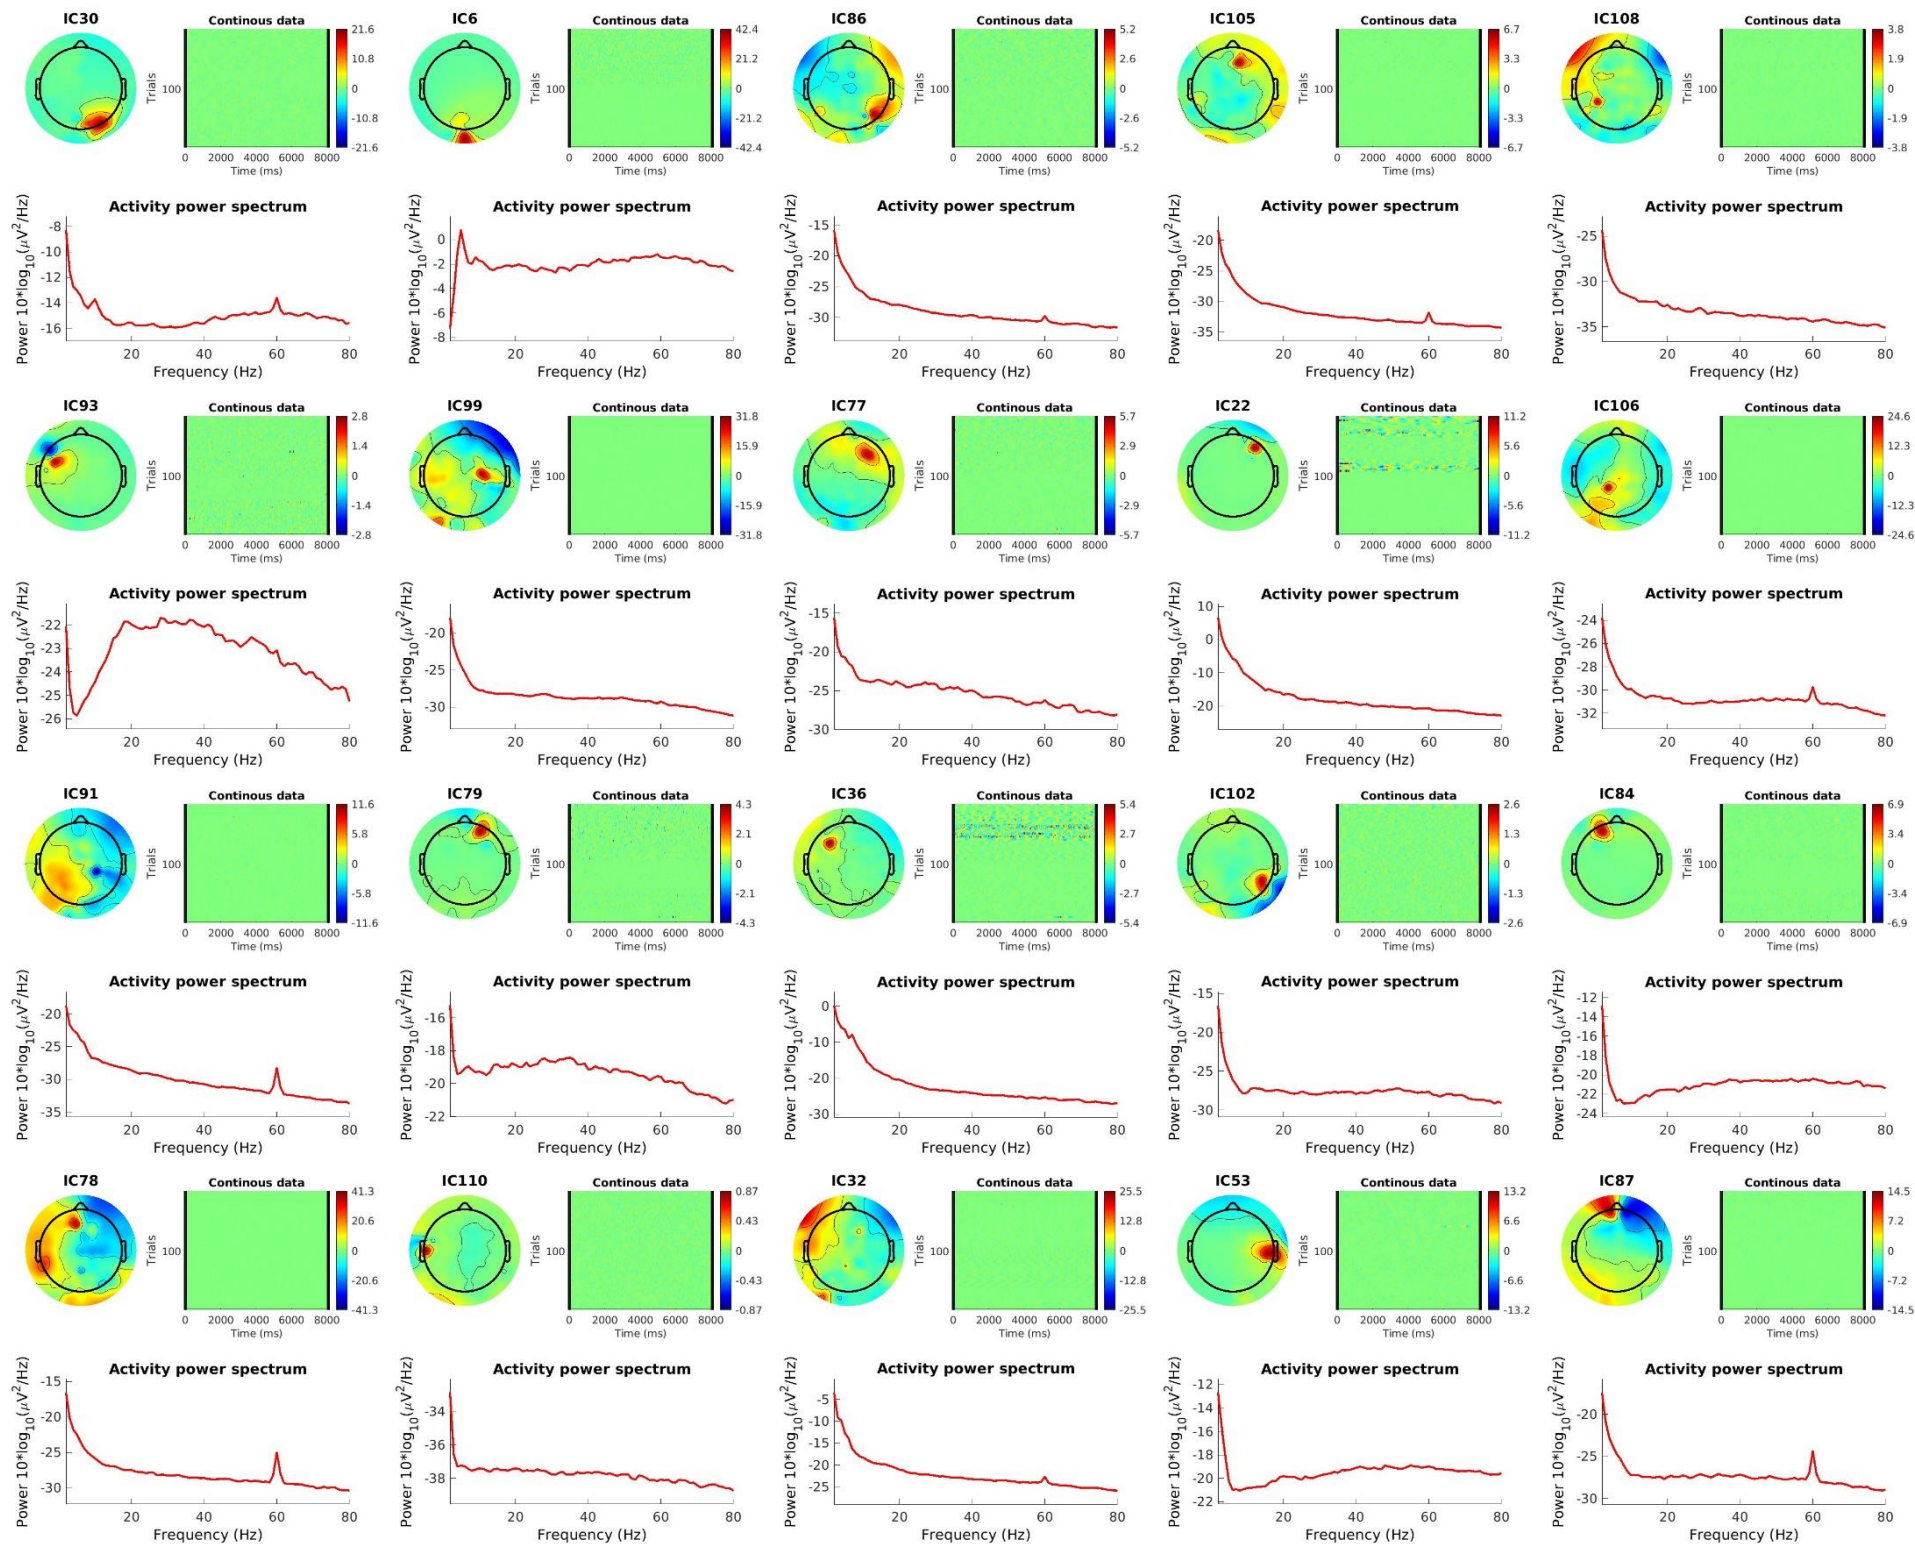

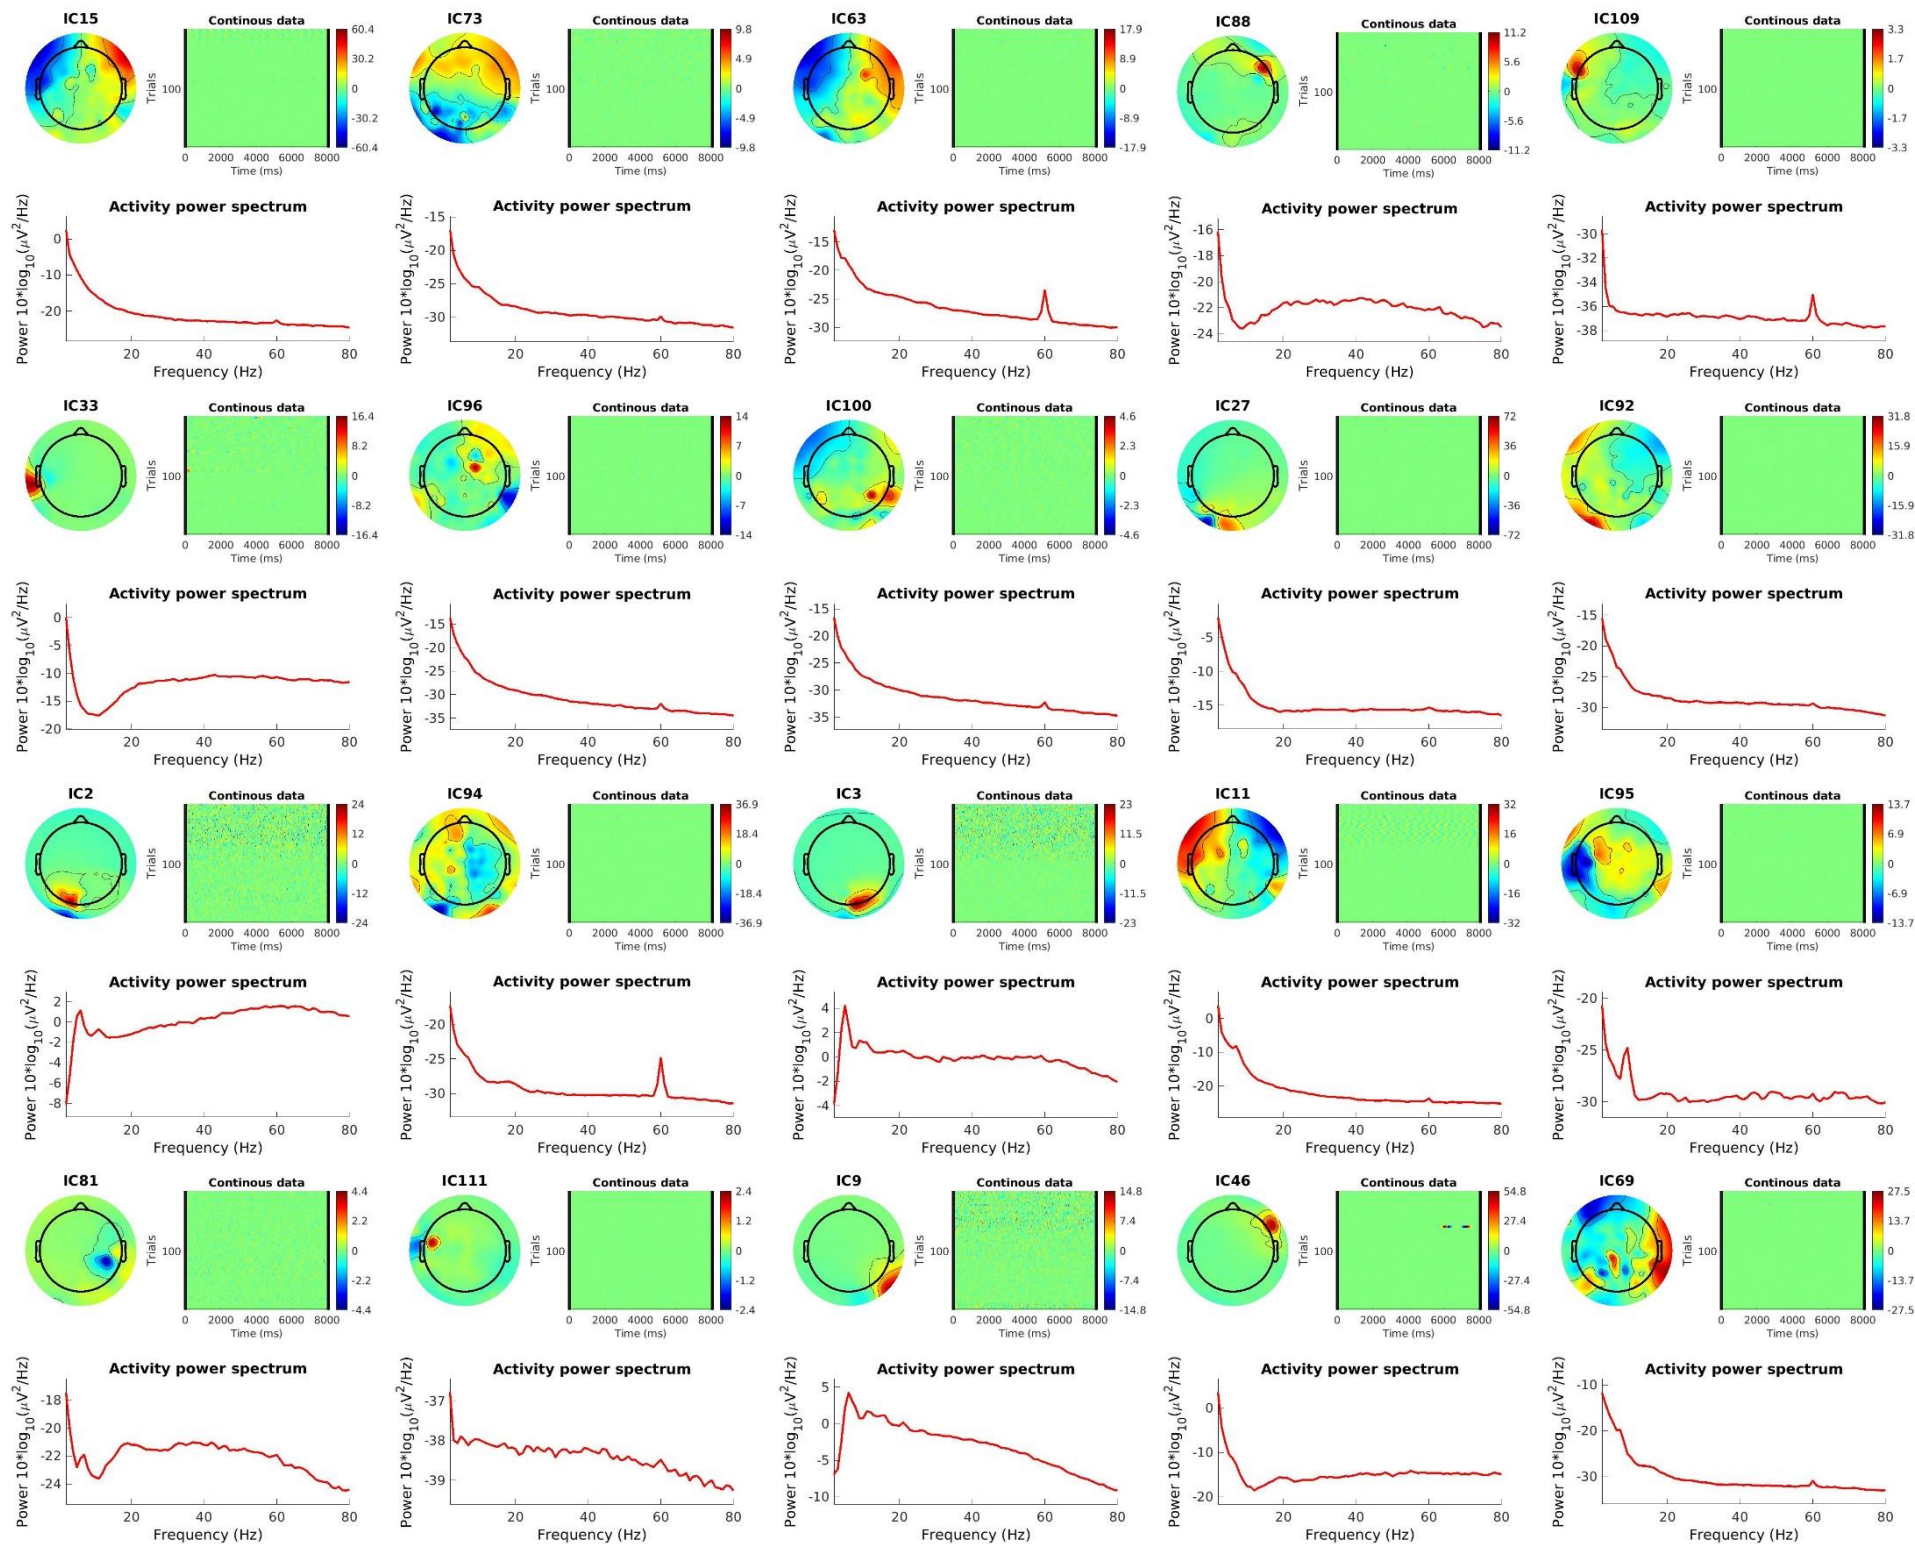



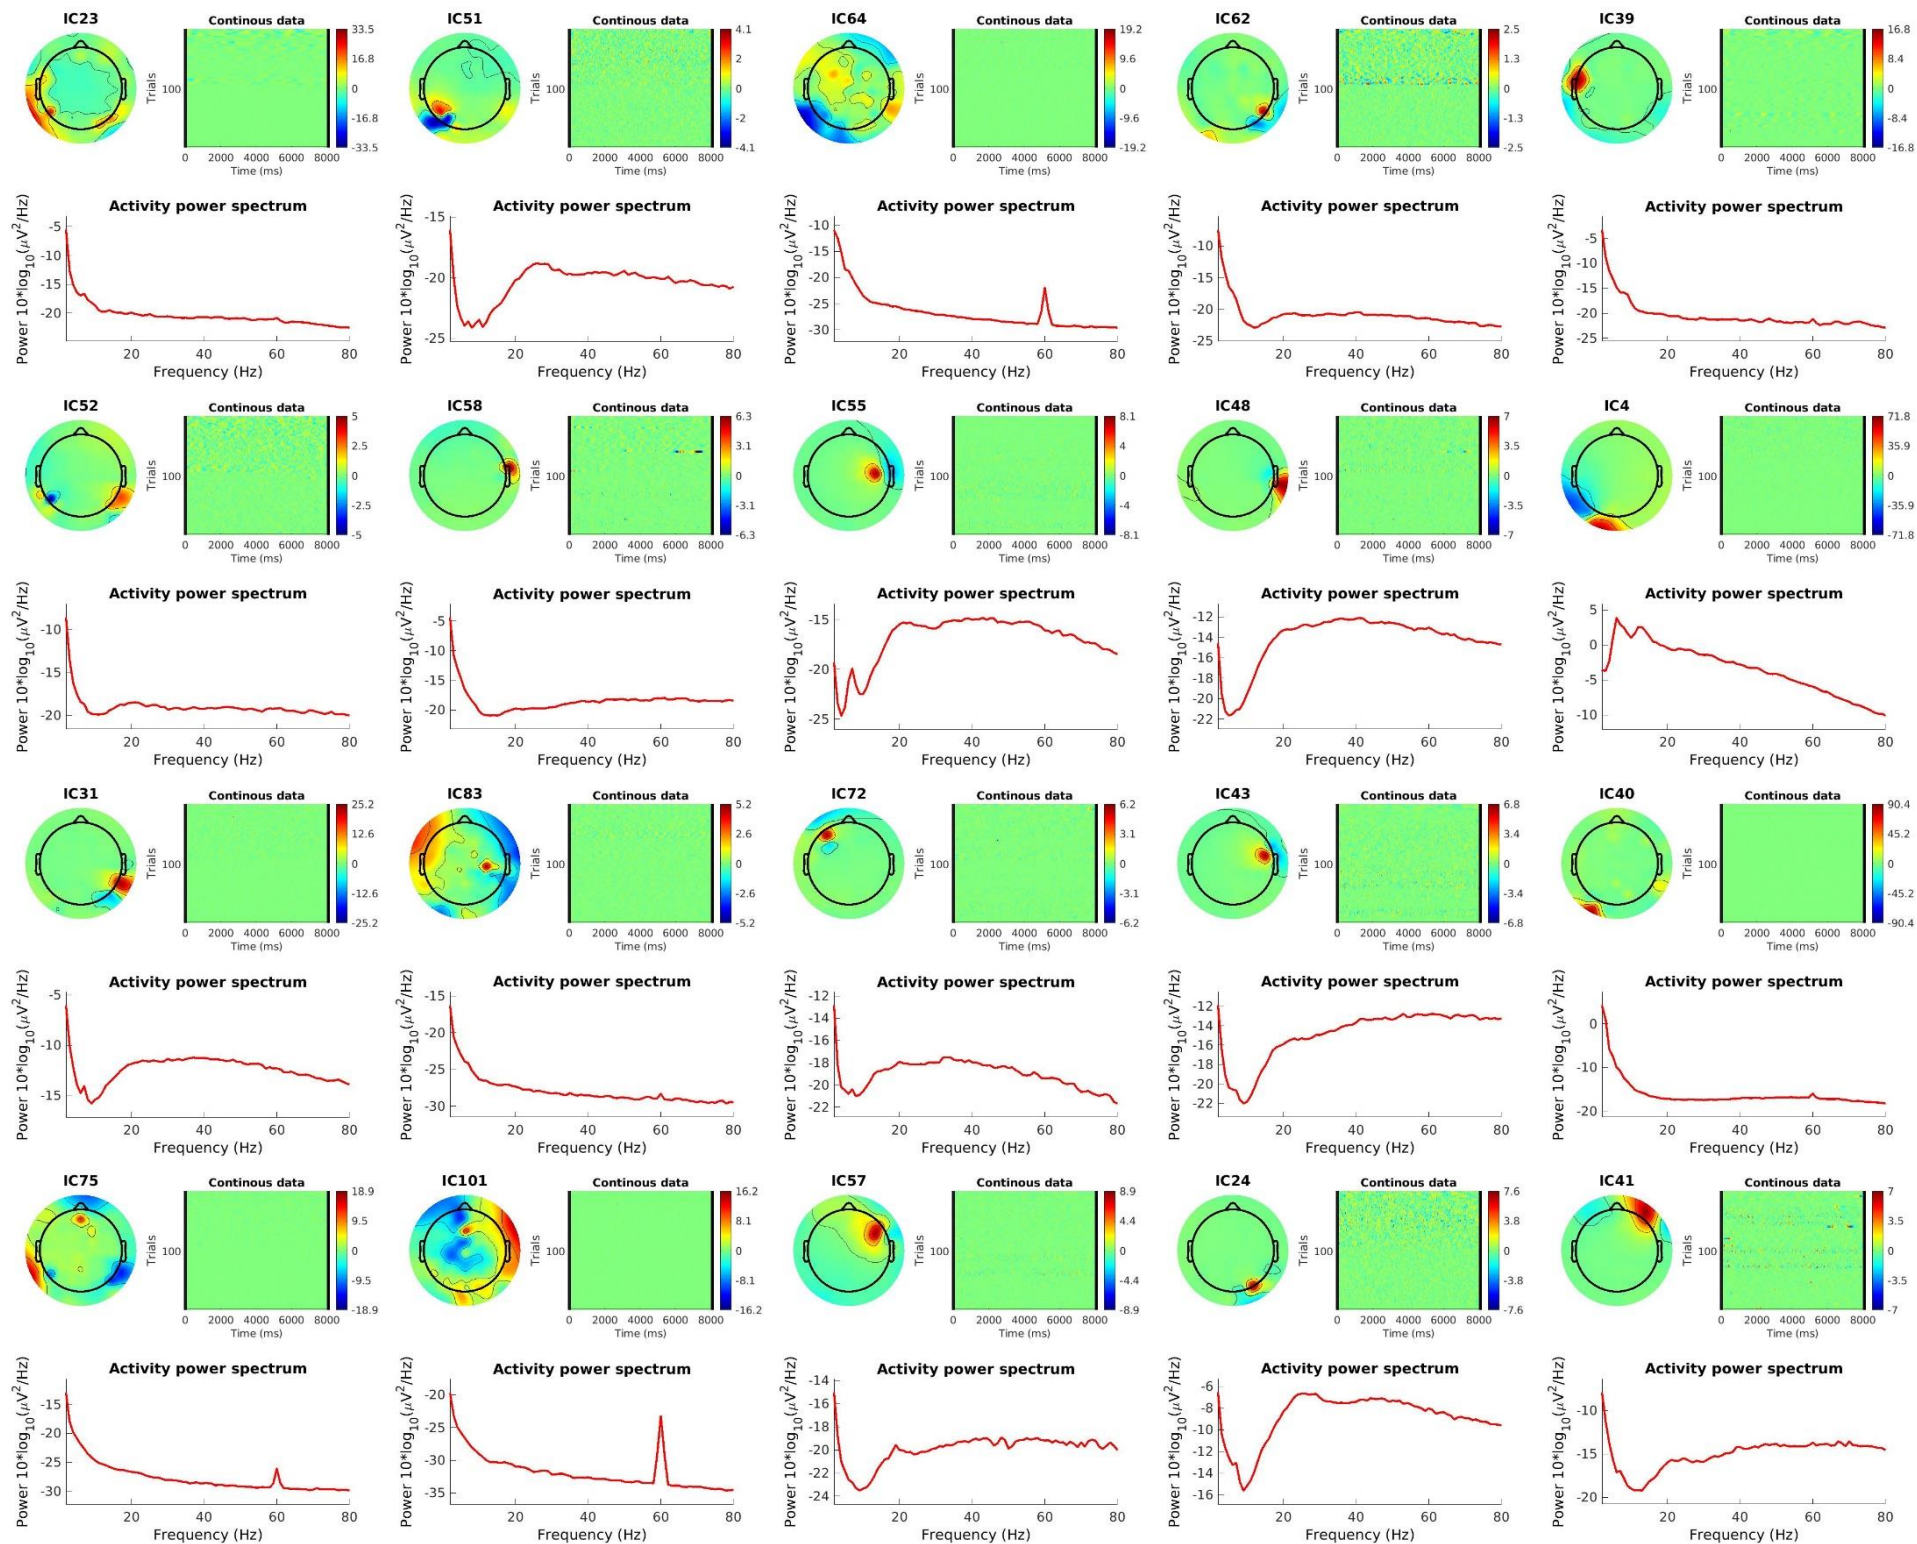

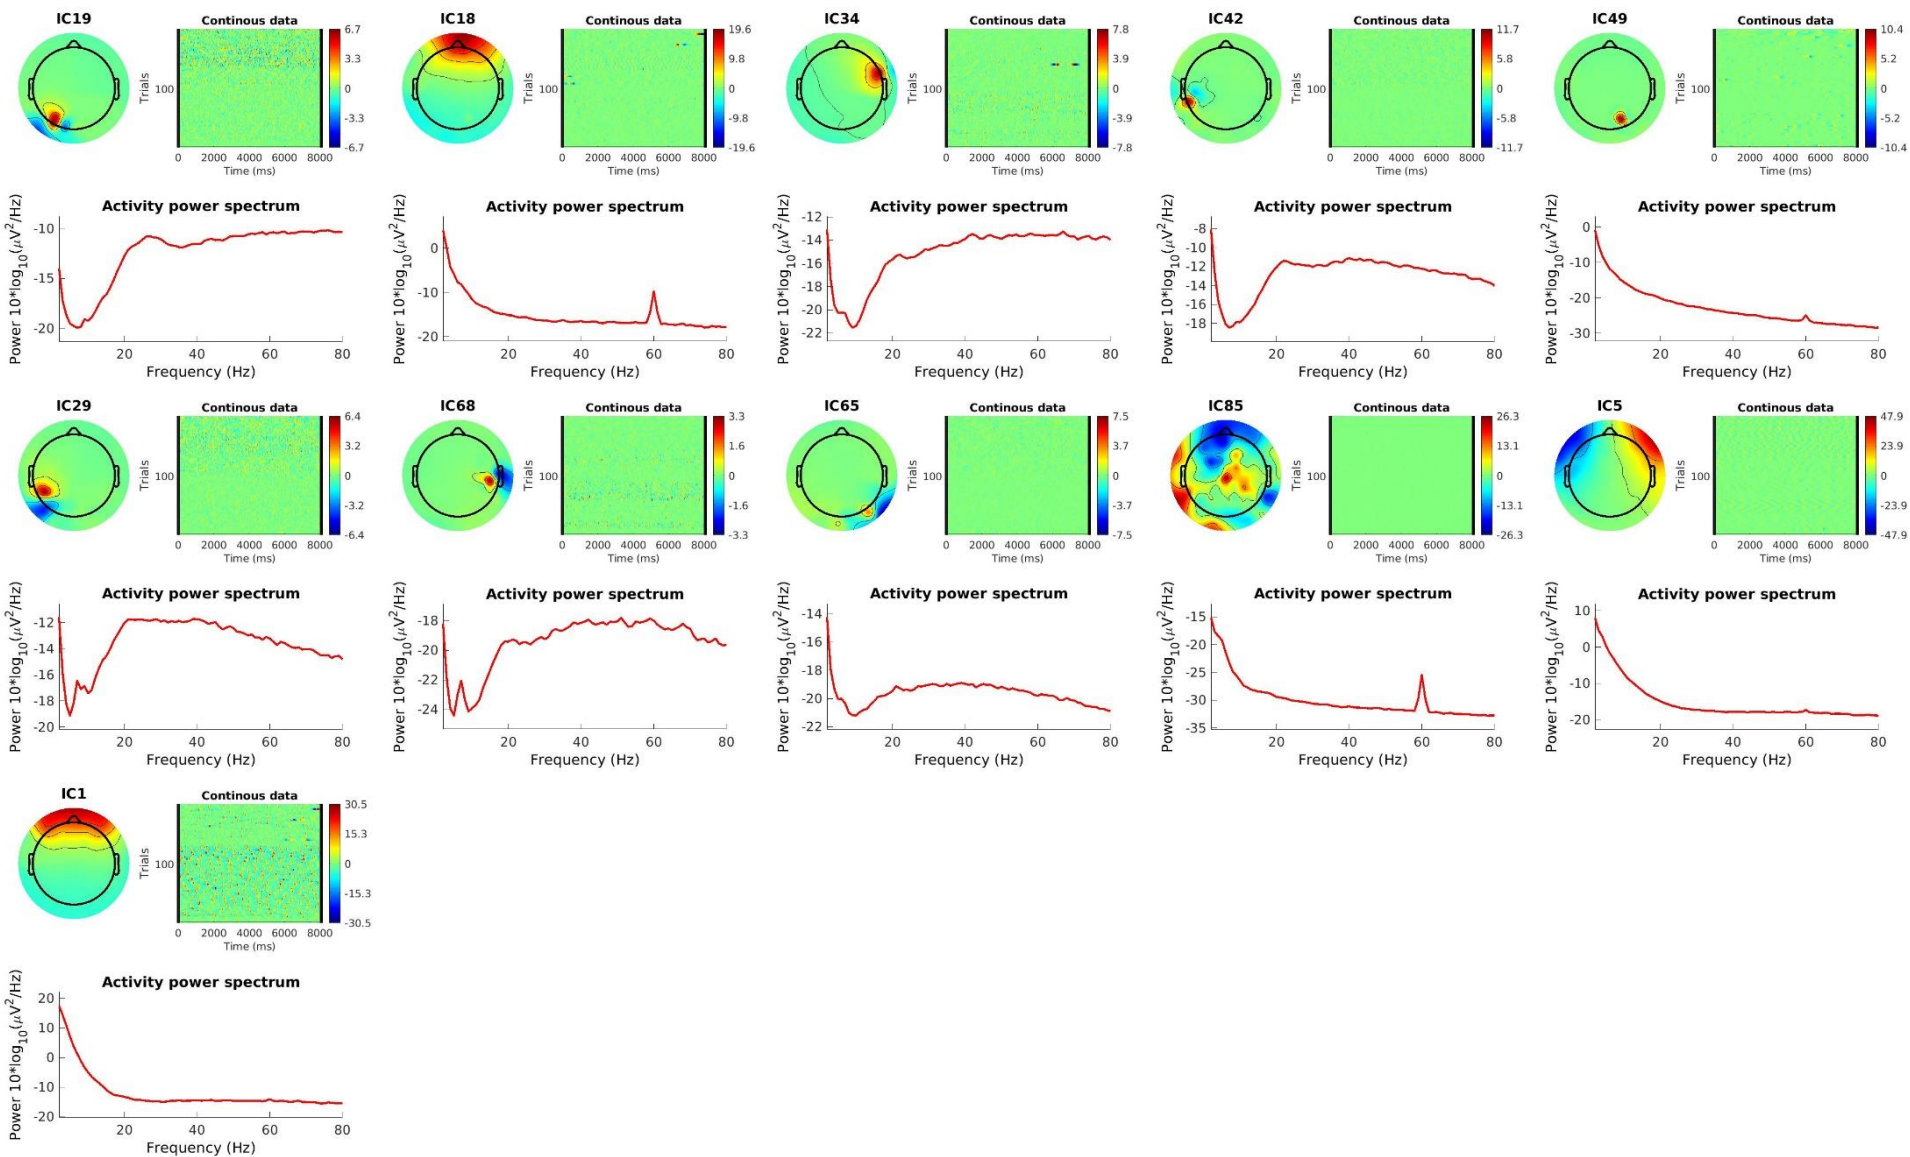



# High Functioning Older Adult With iCanClean

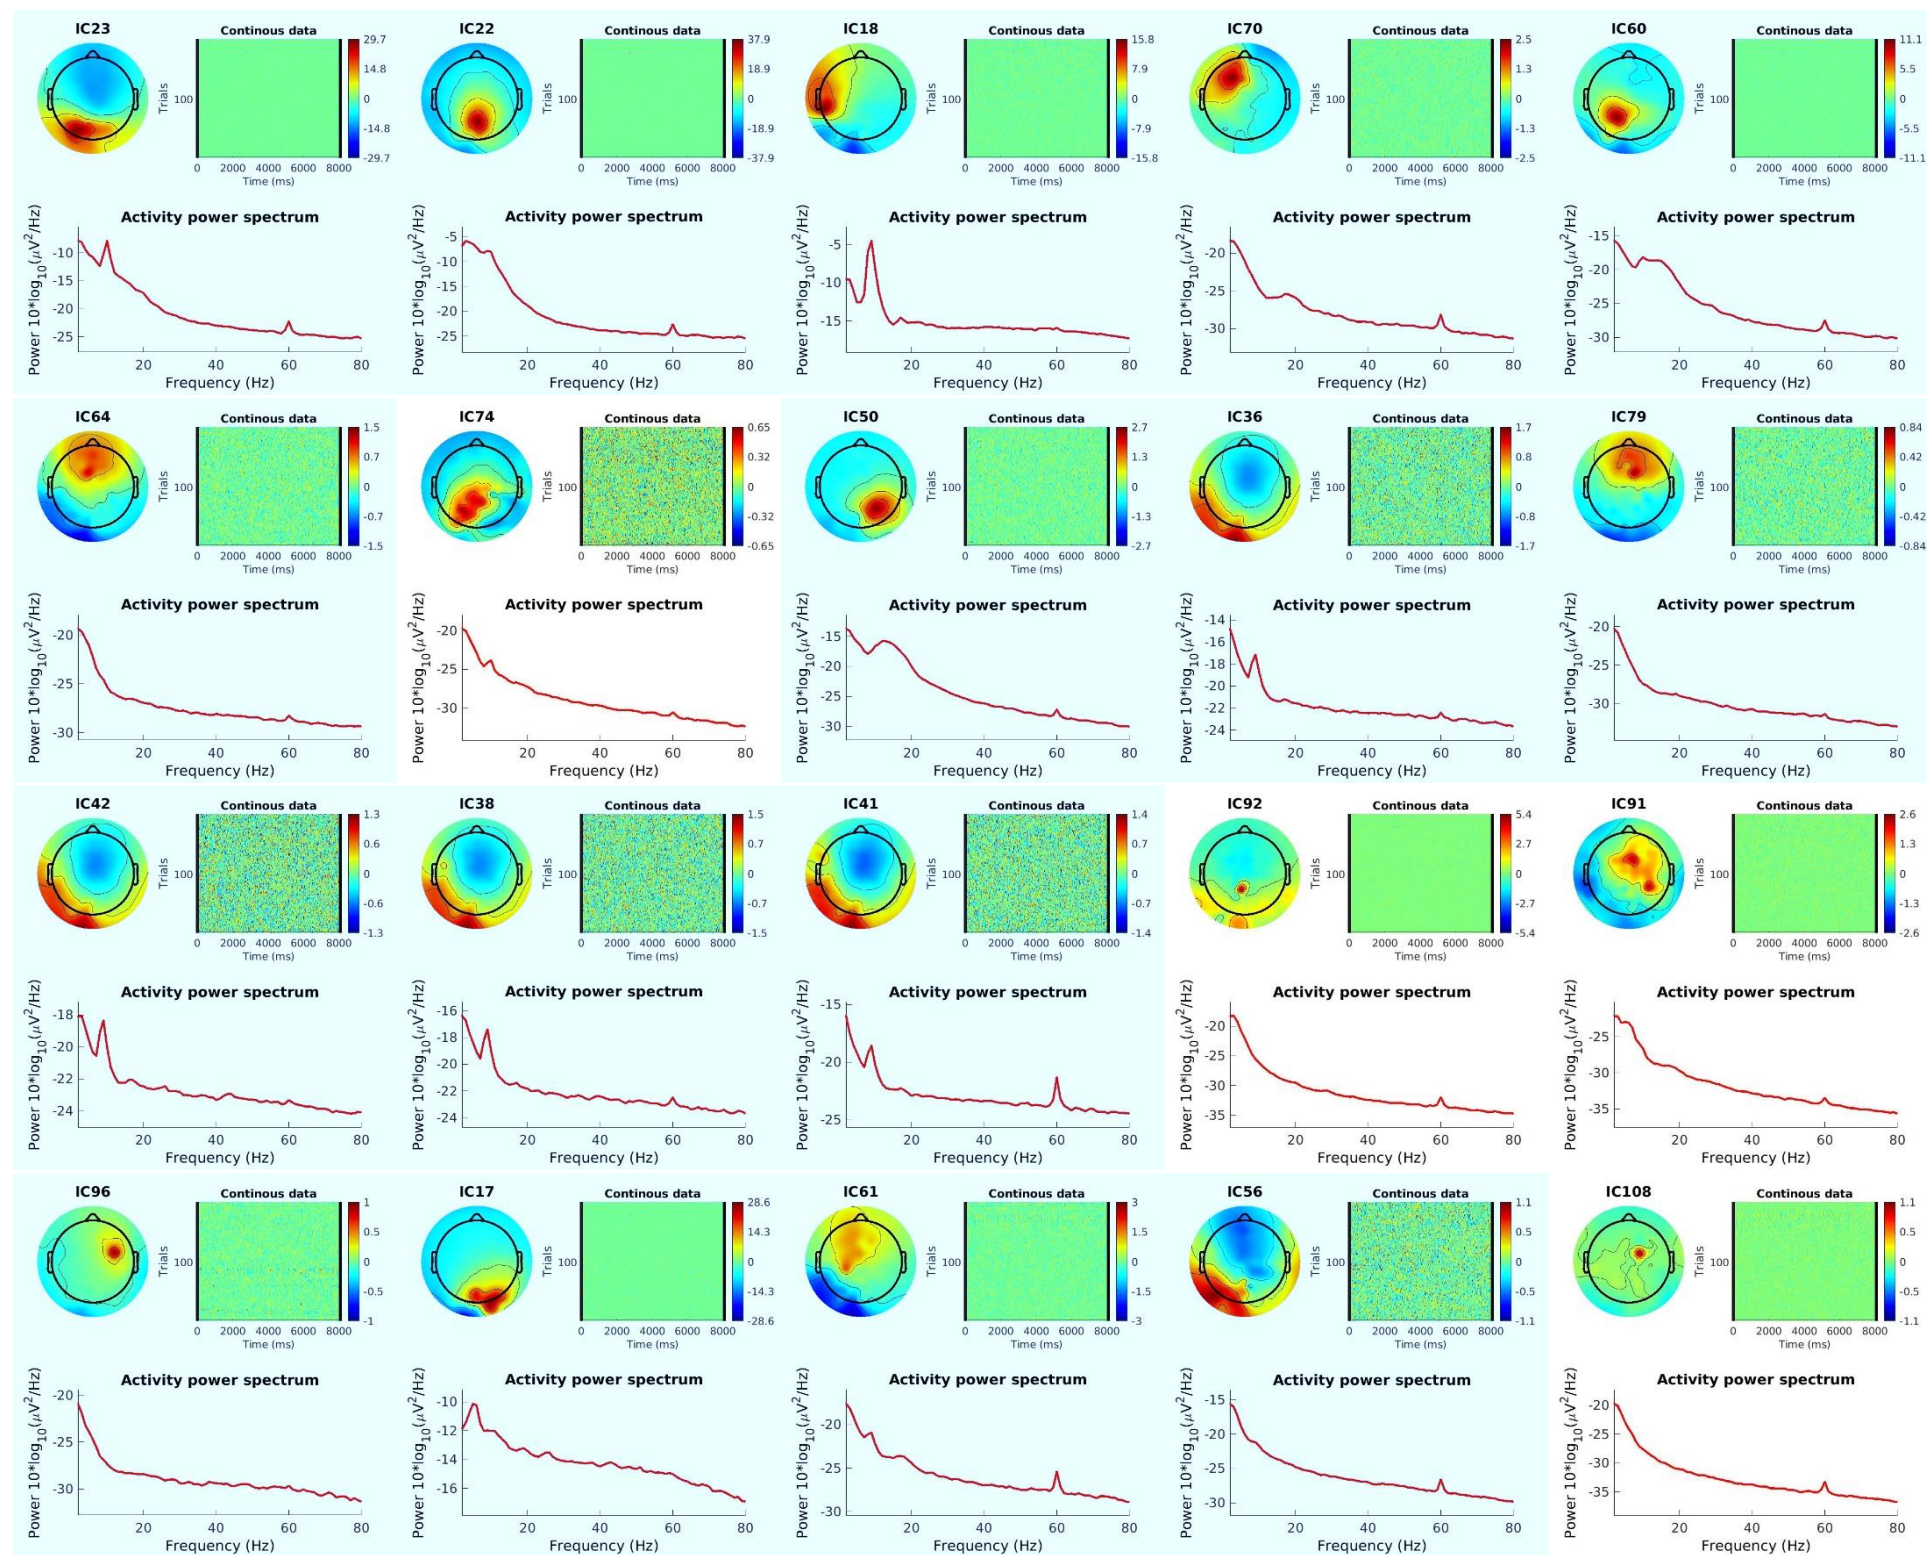

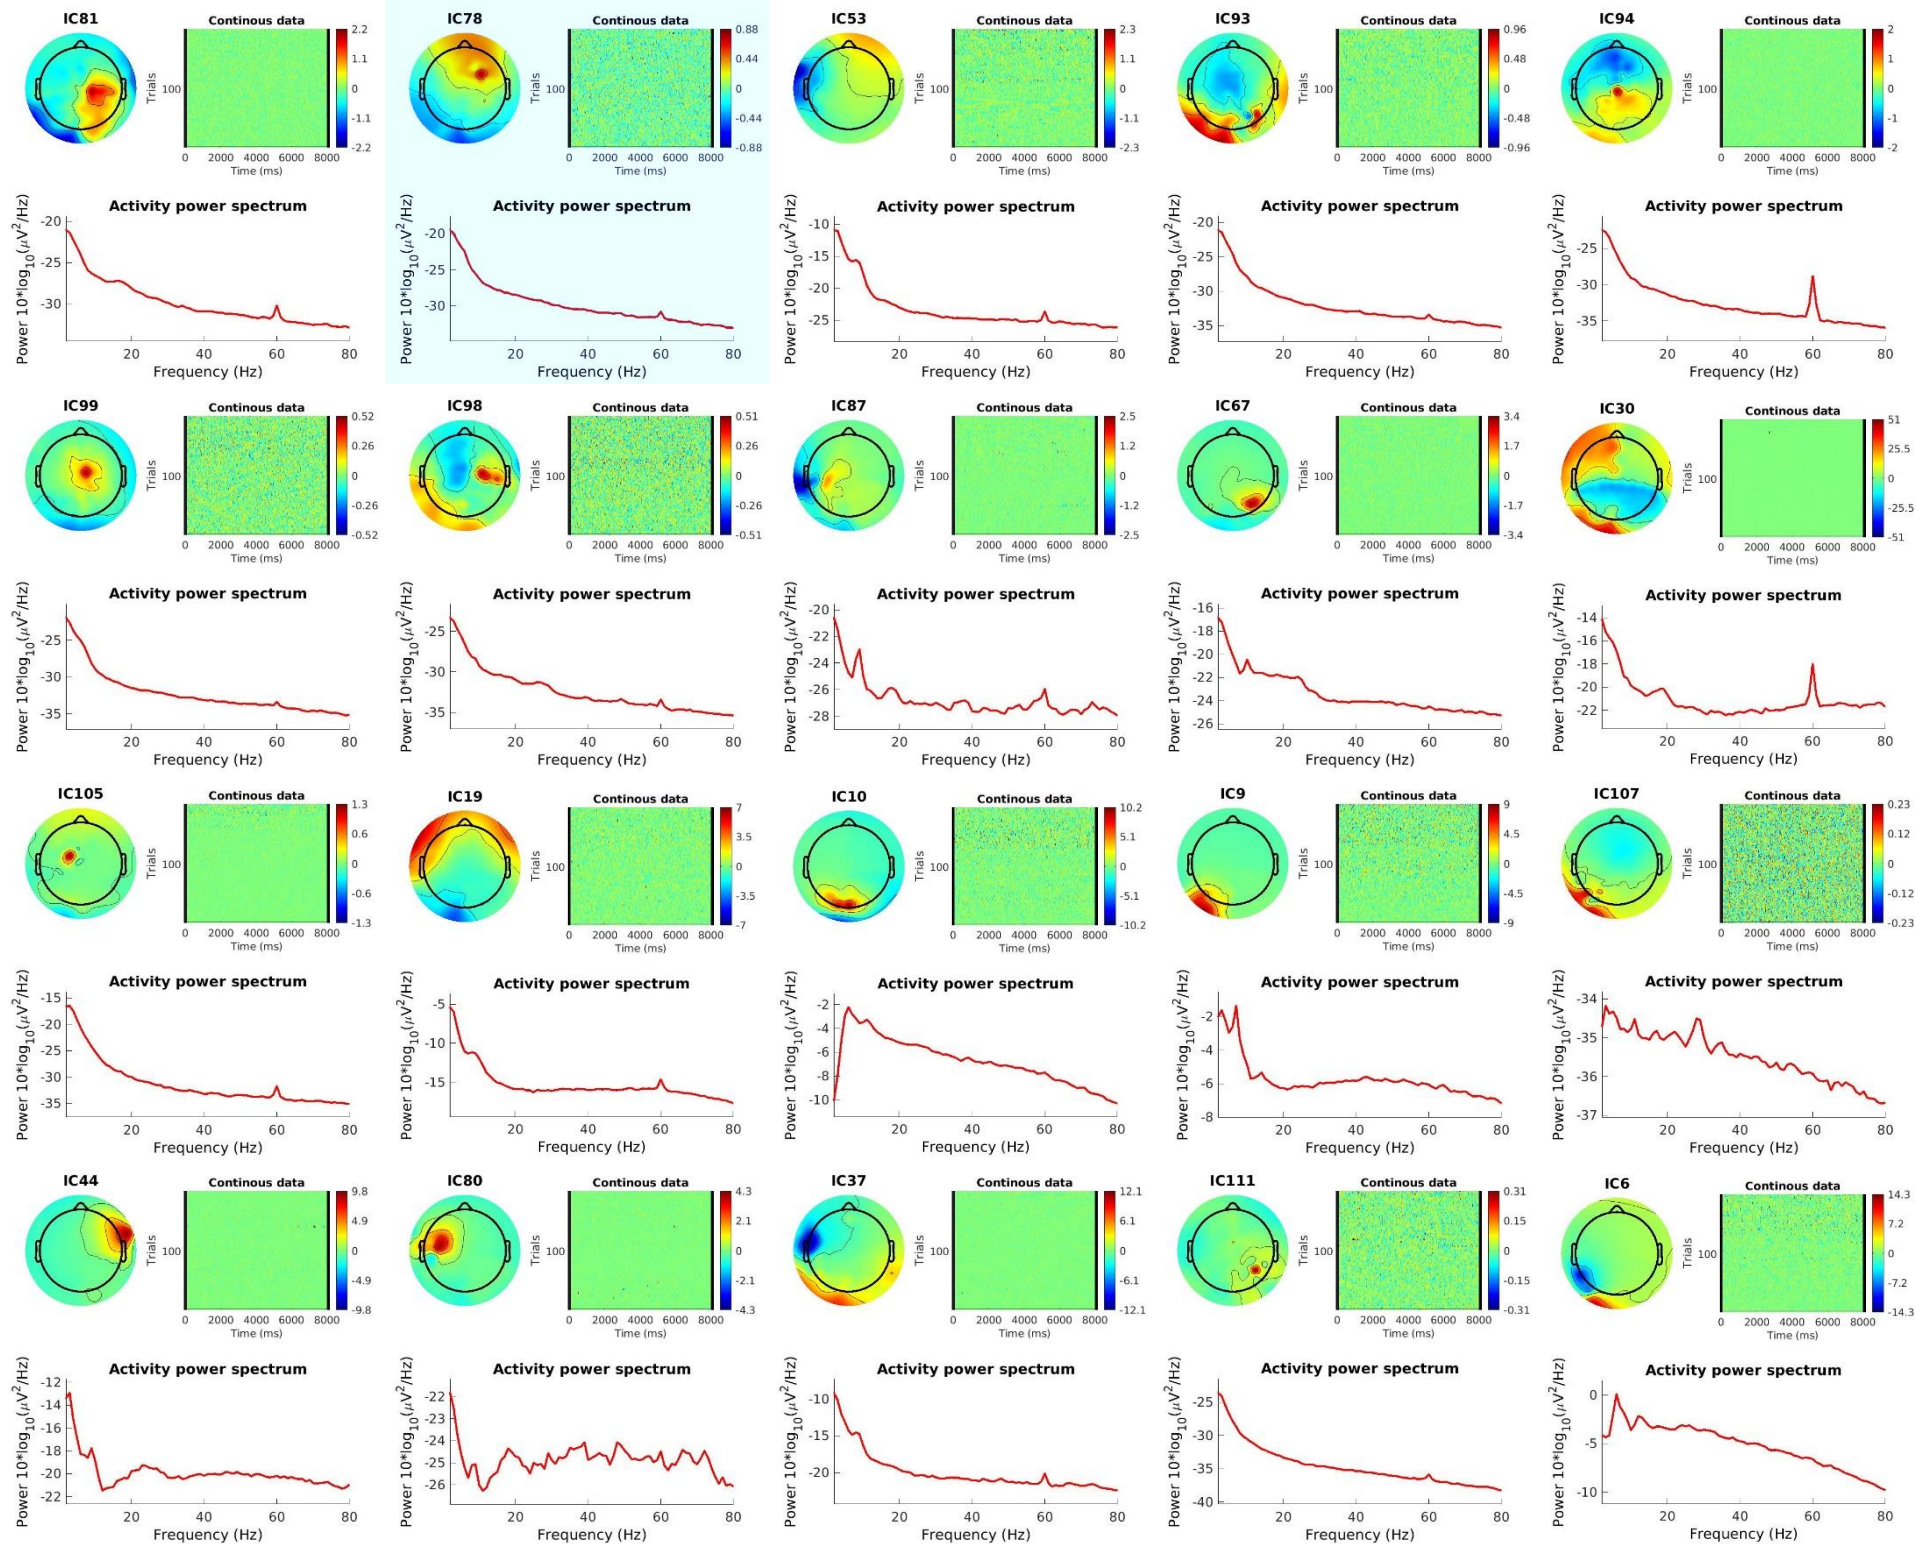



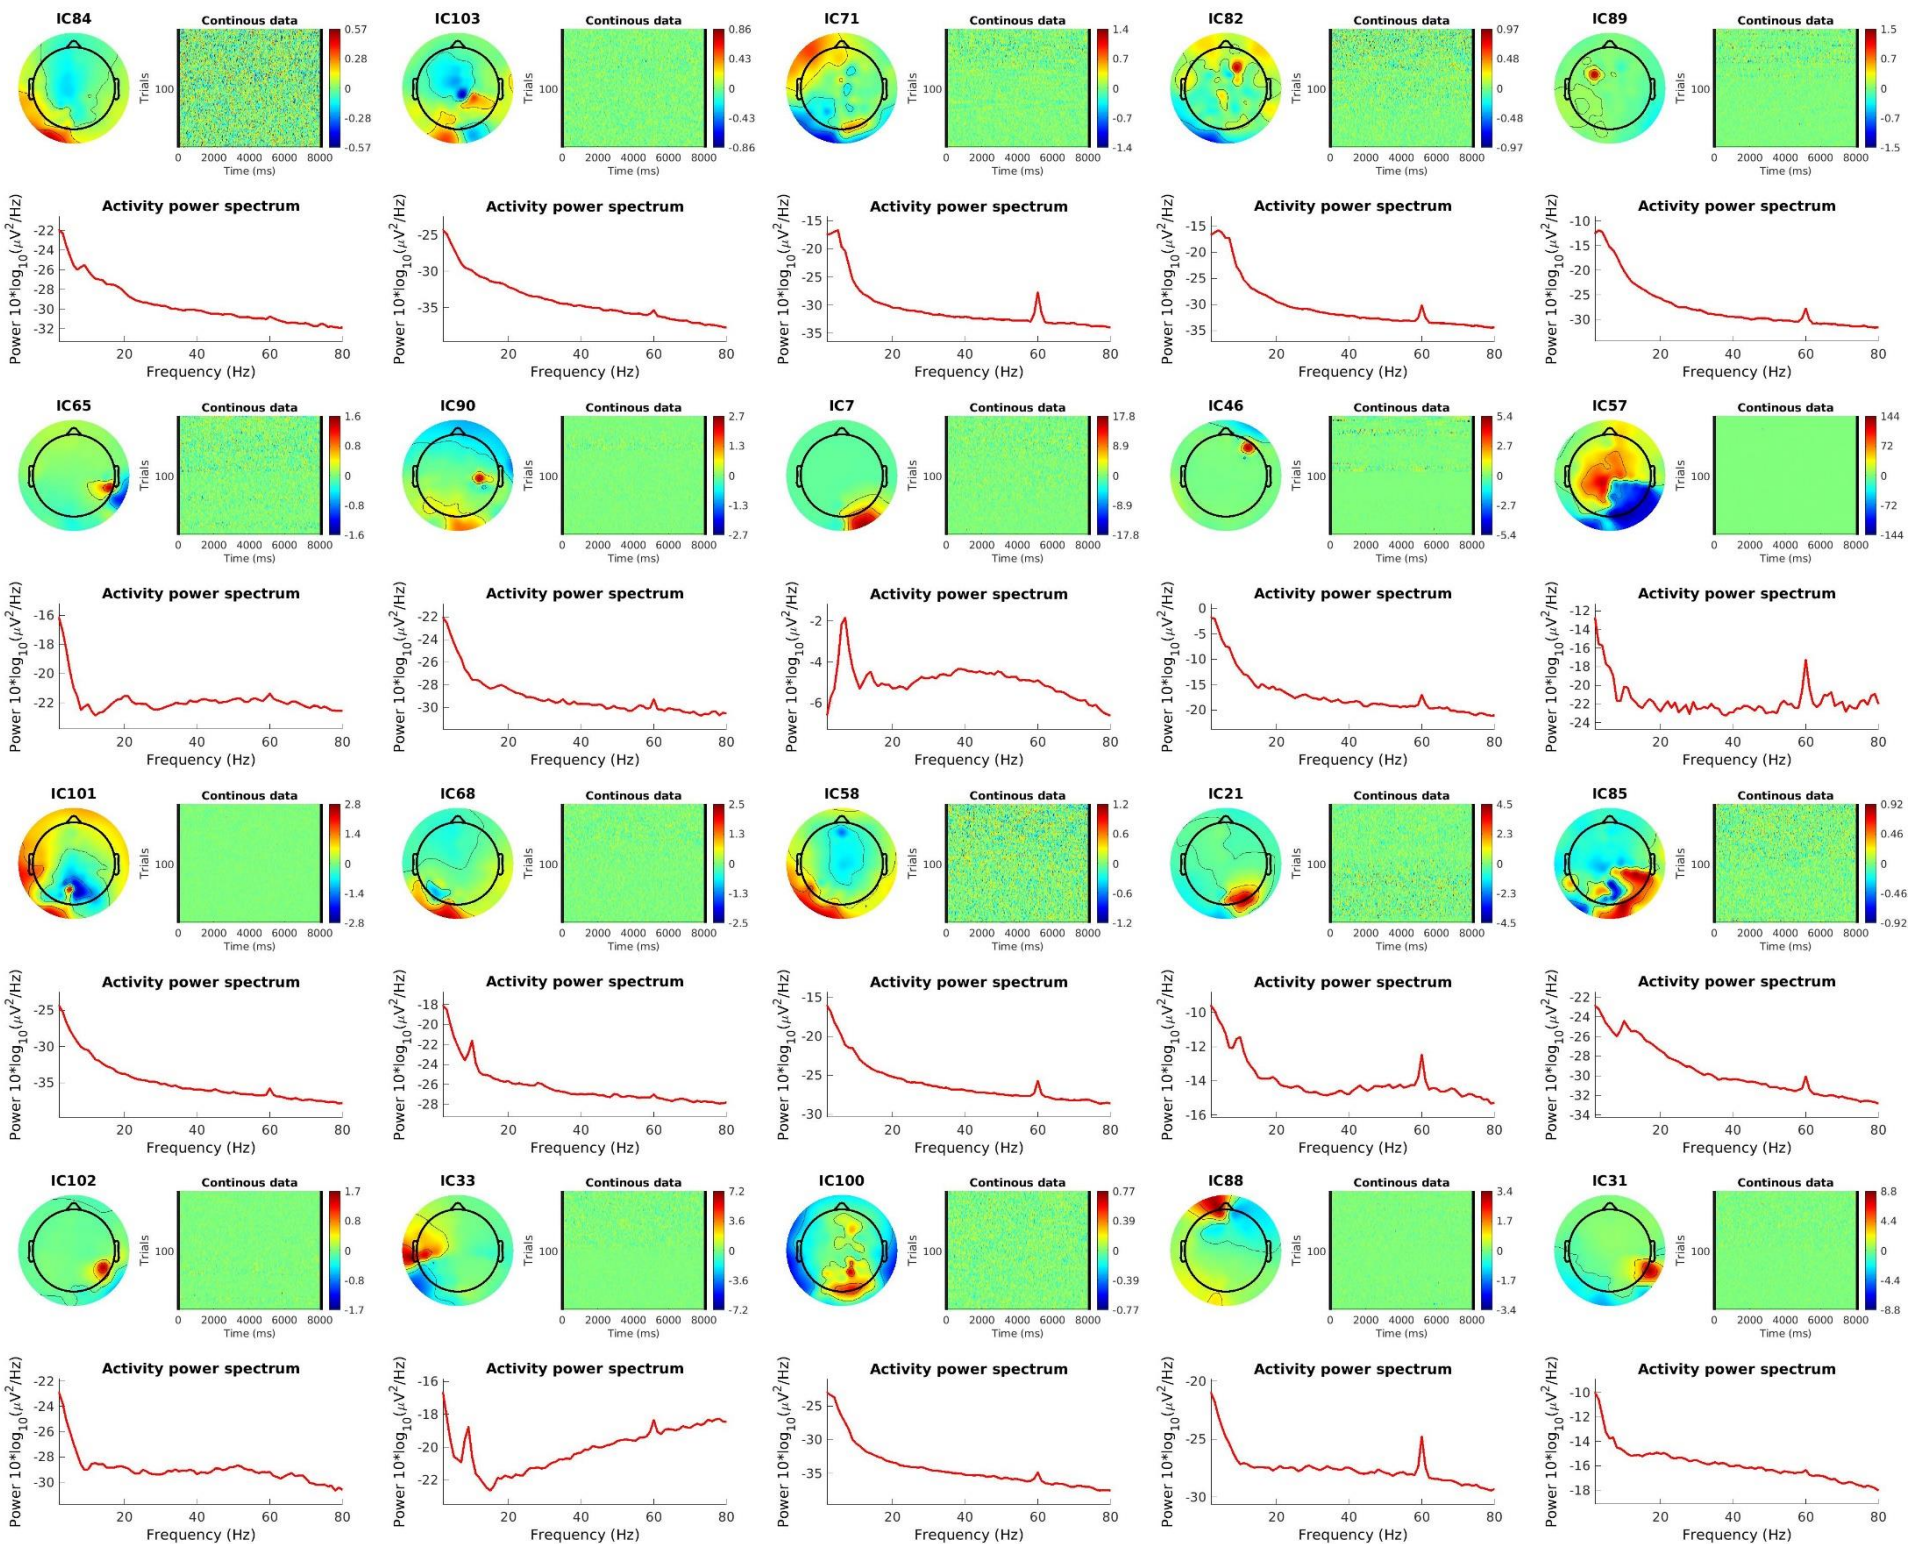

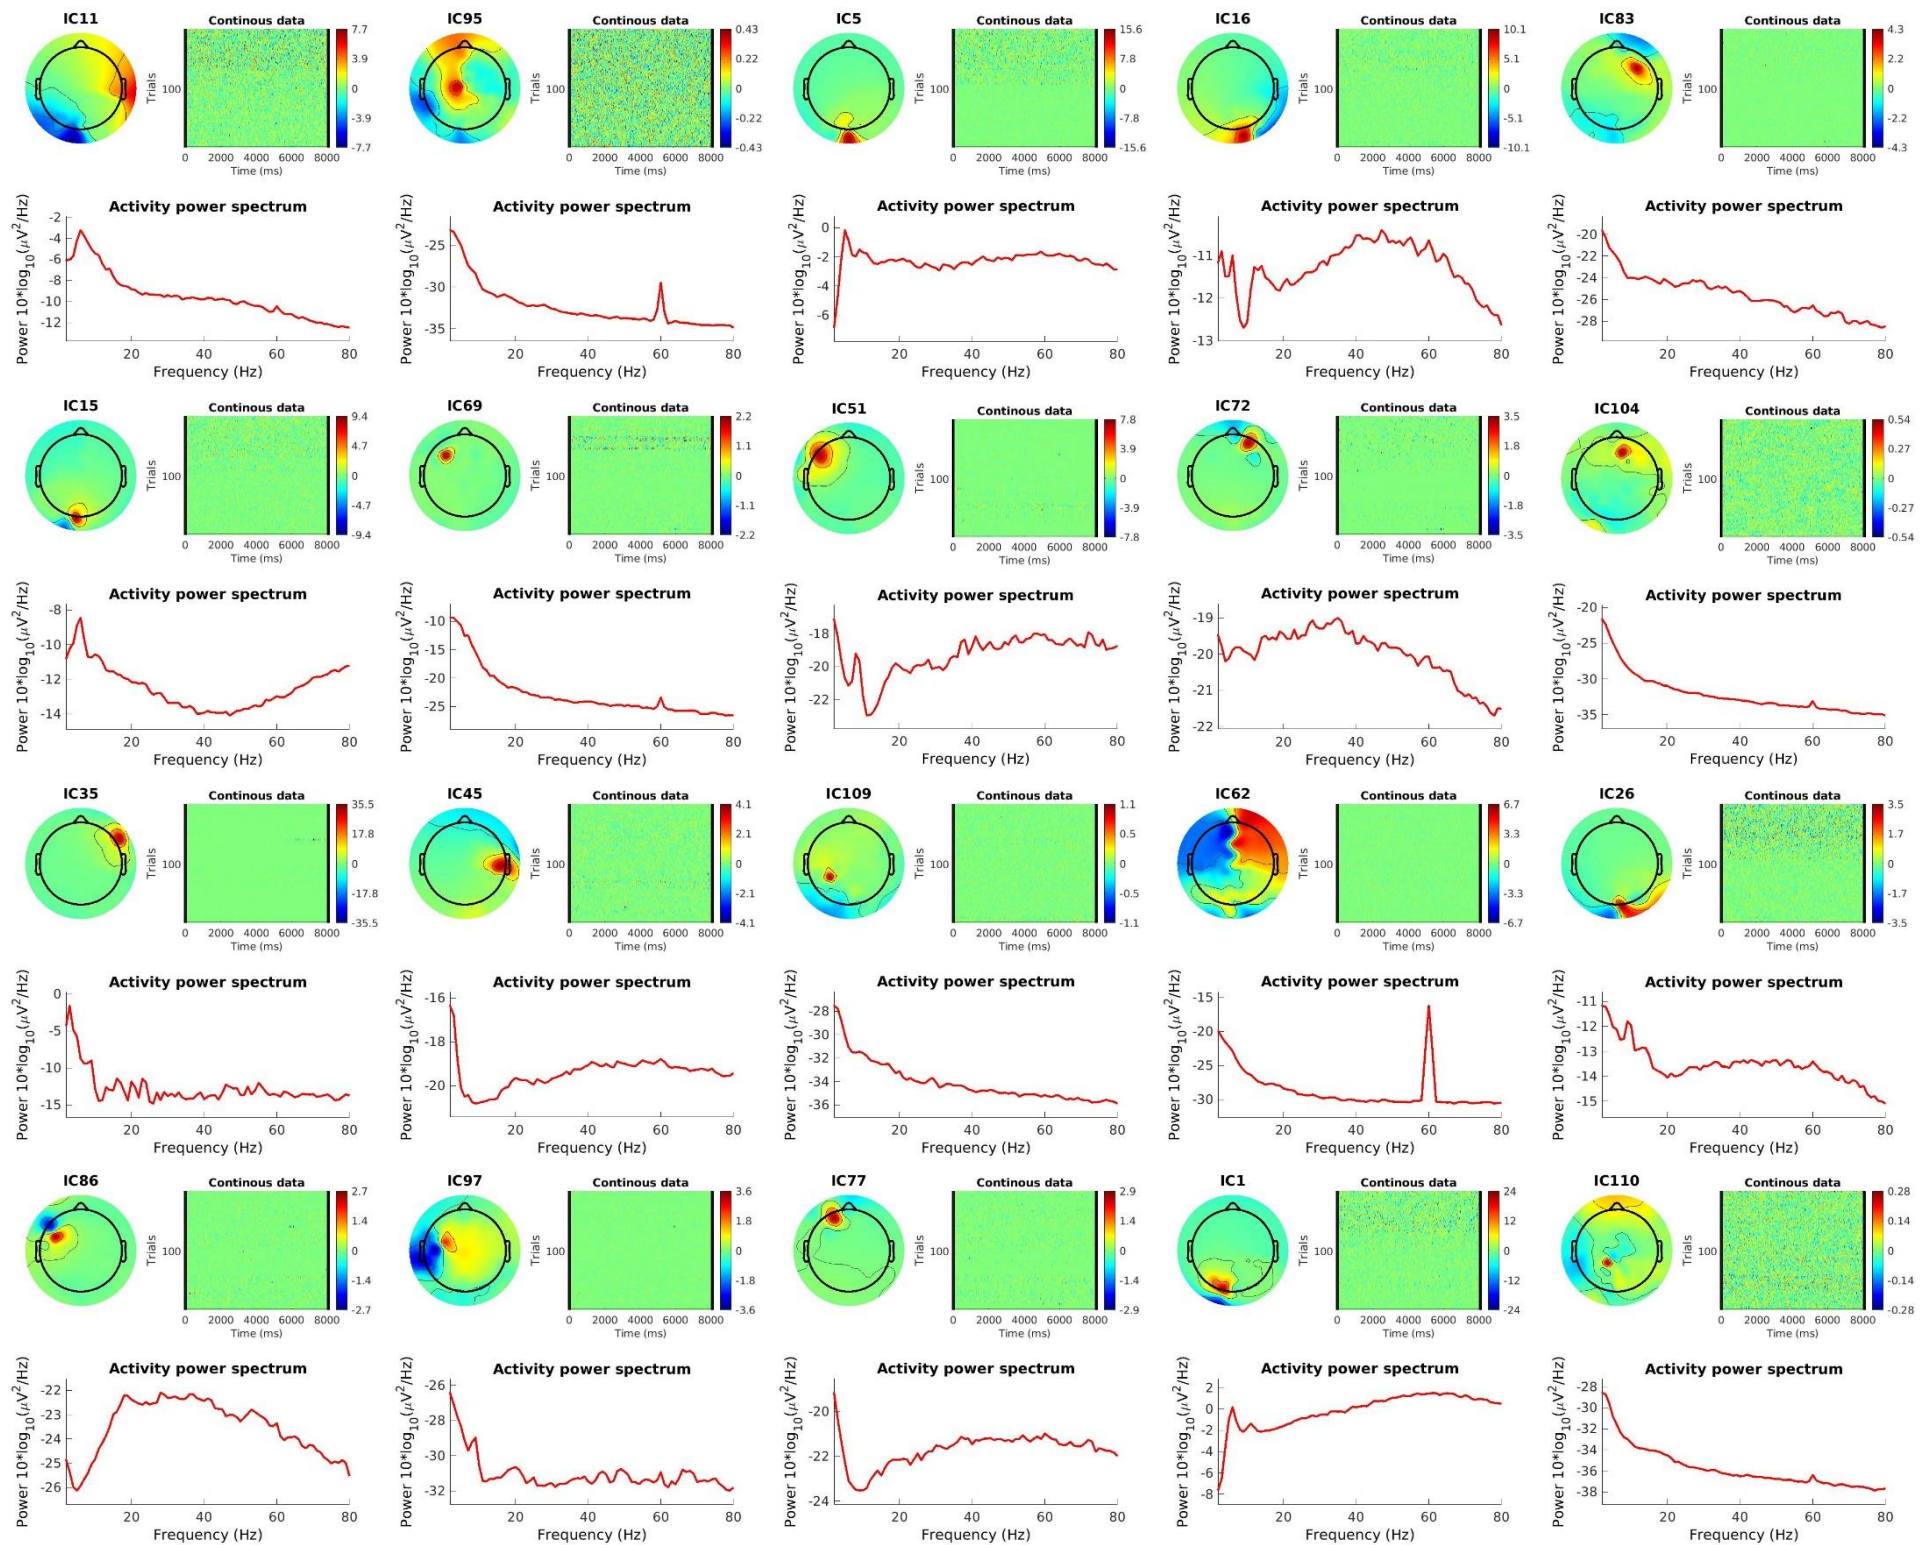



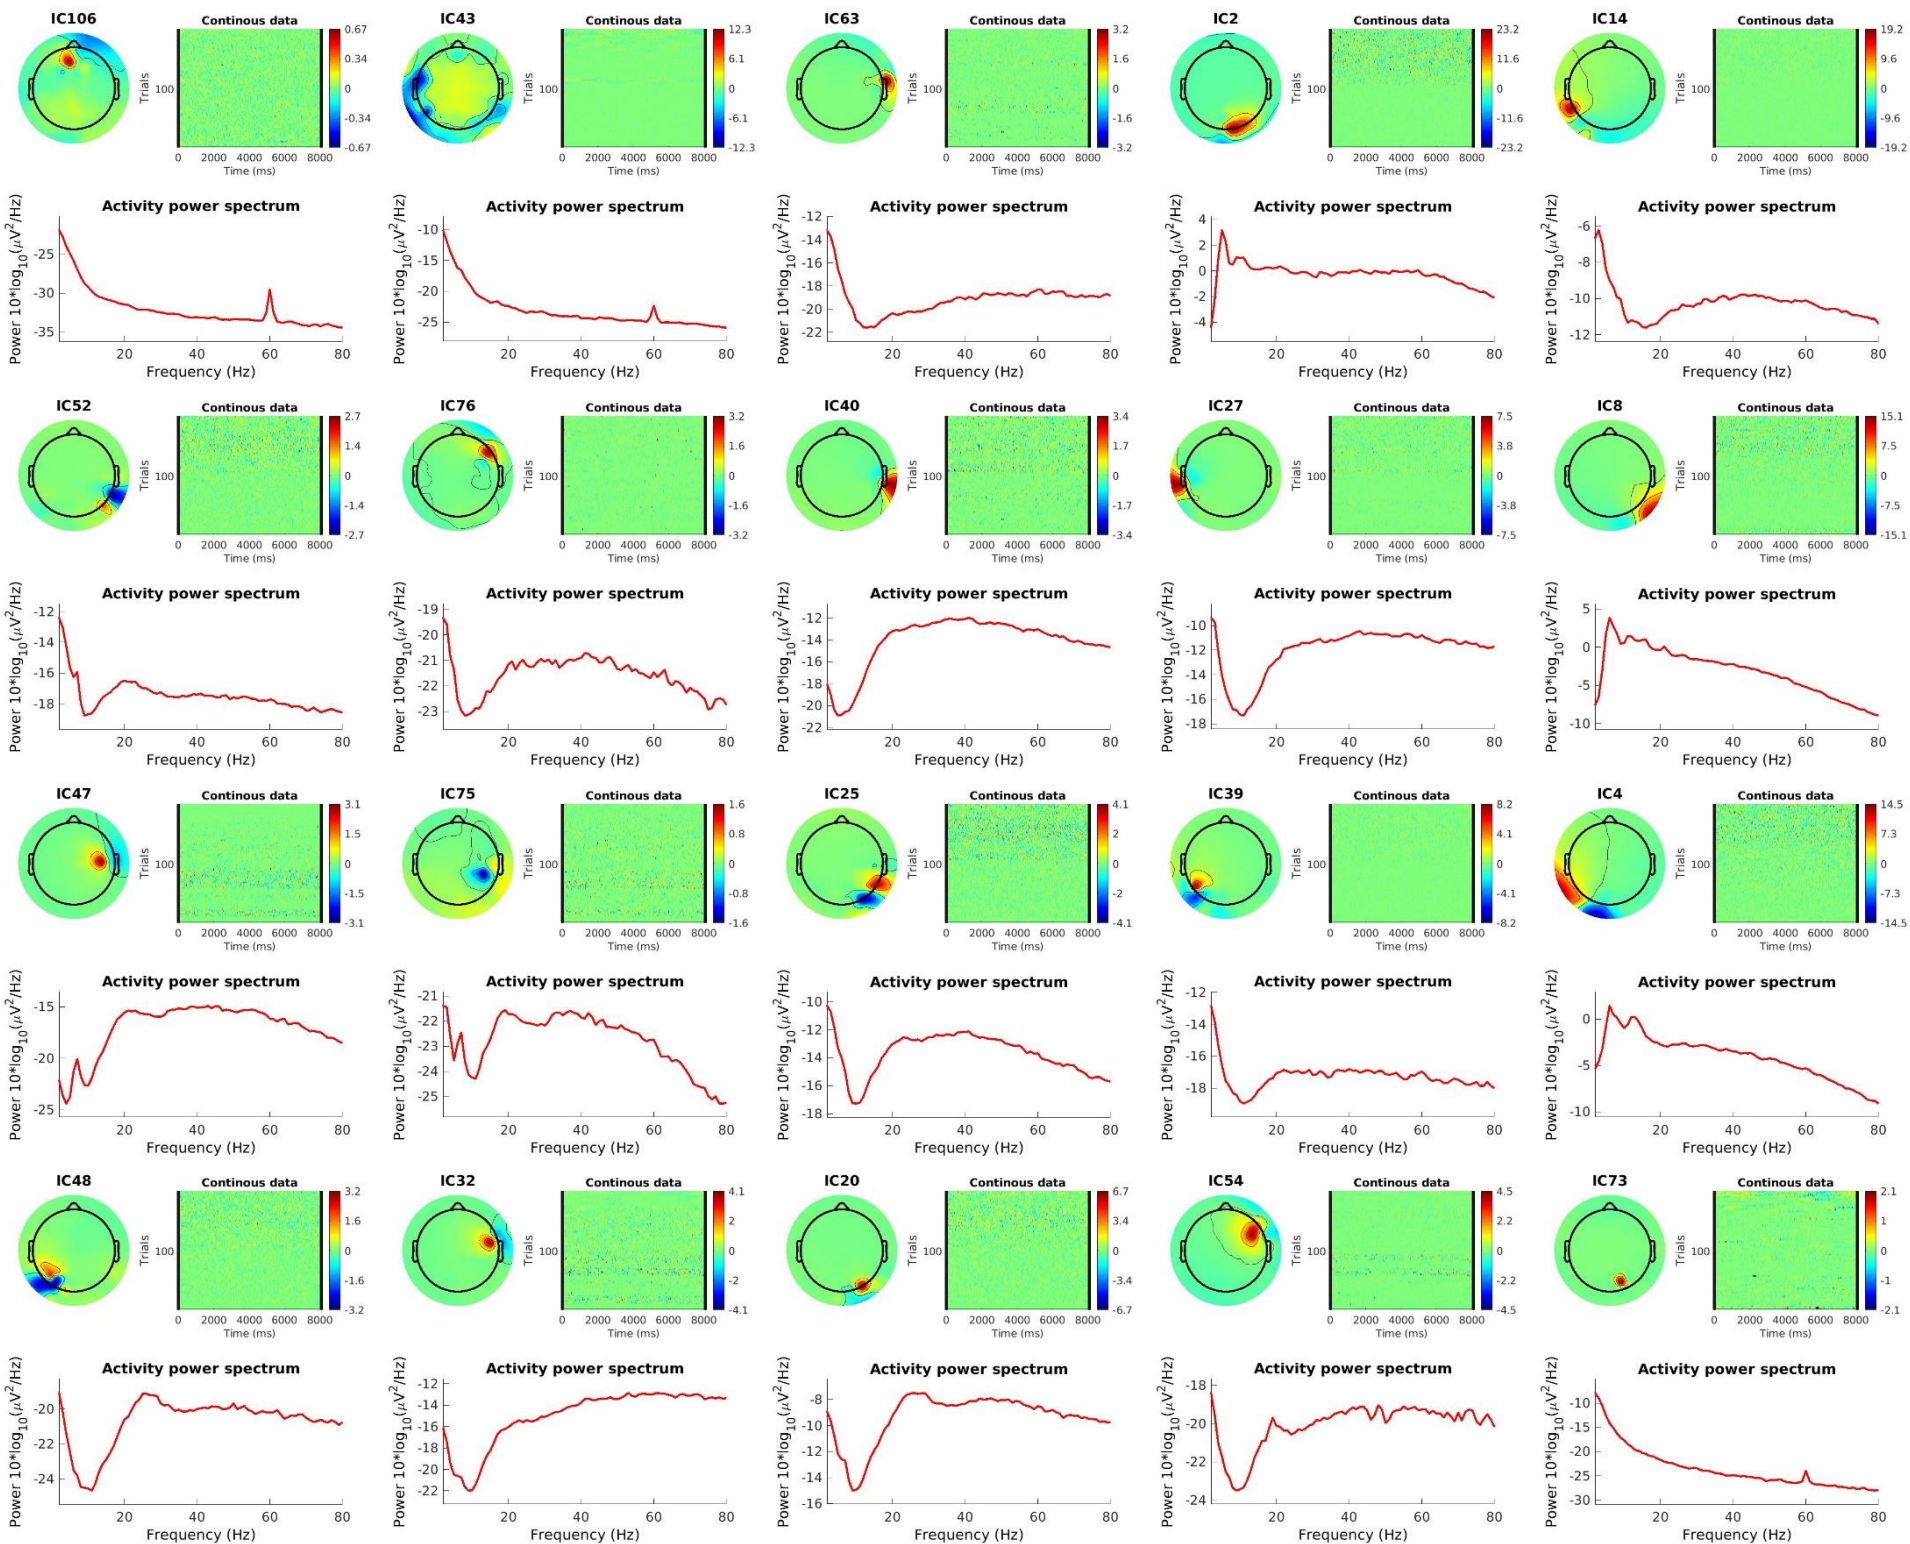

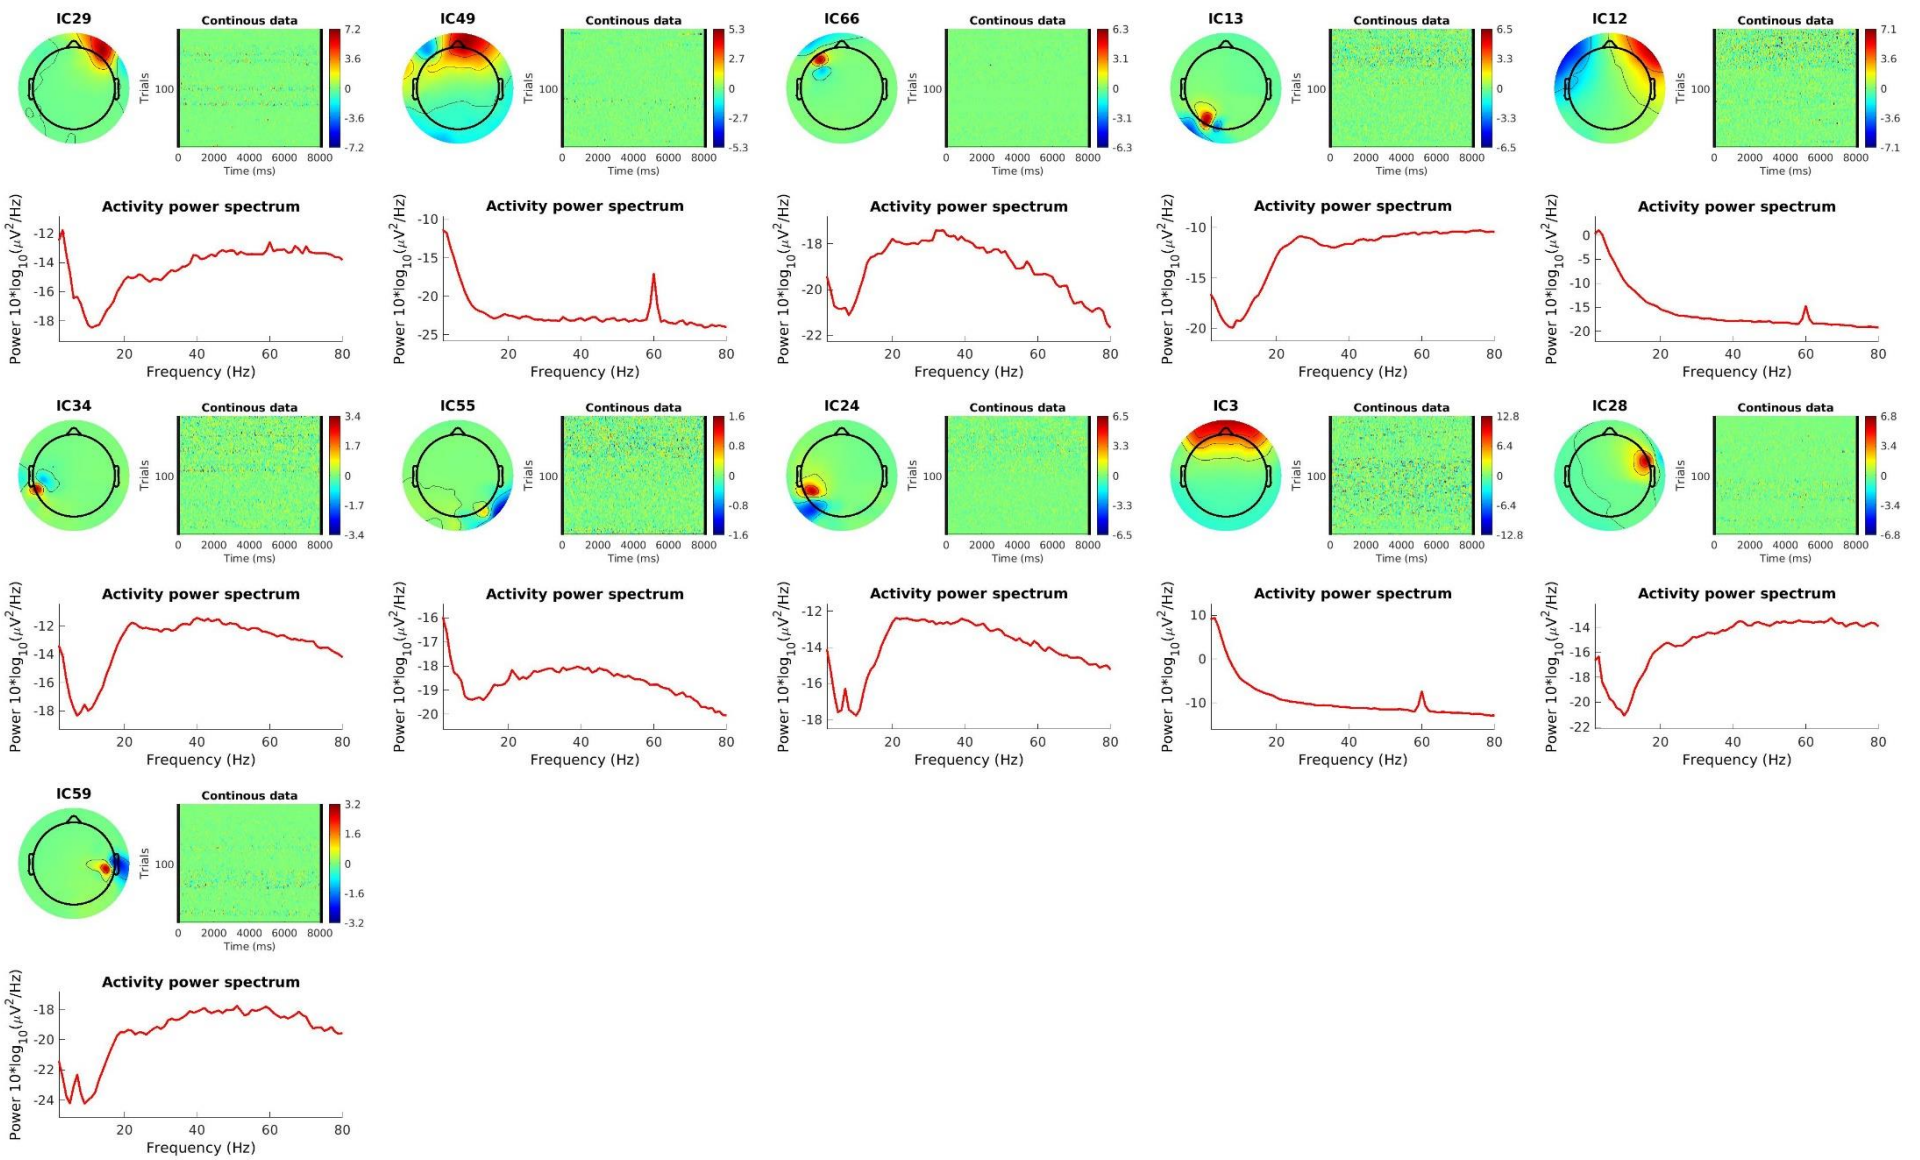



# Low Functioning Older Adult Without iCanClean

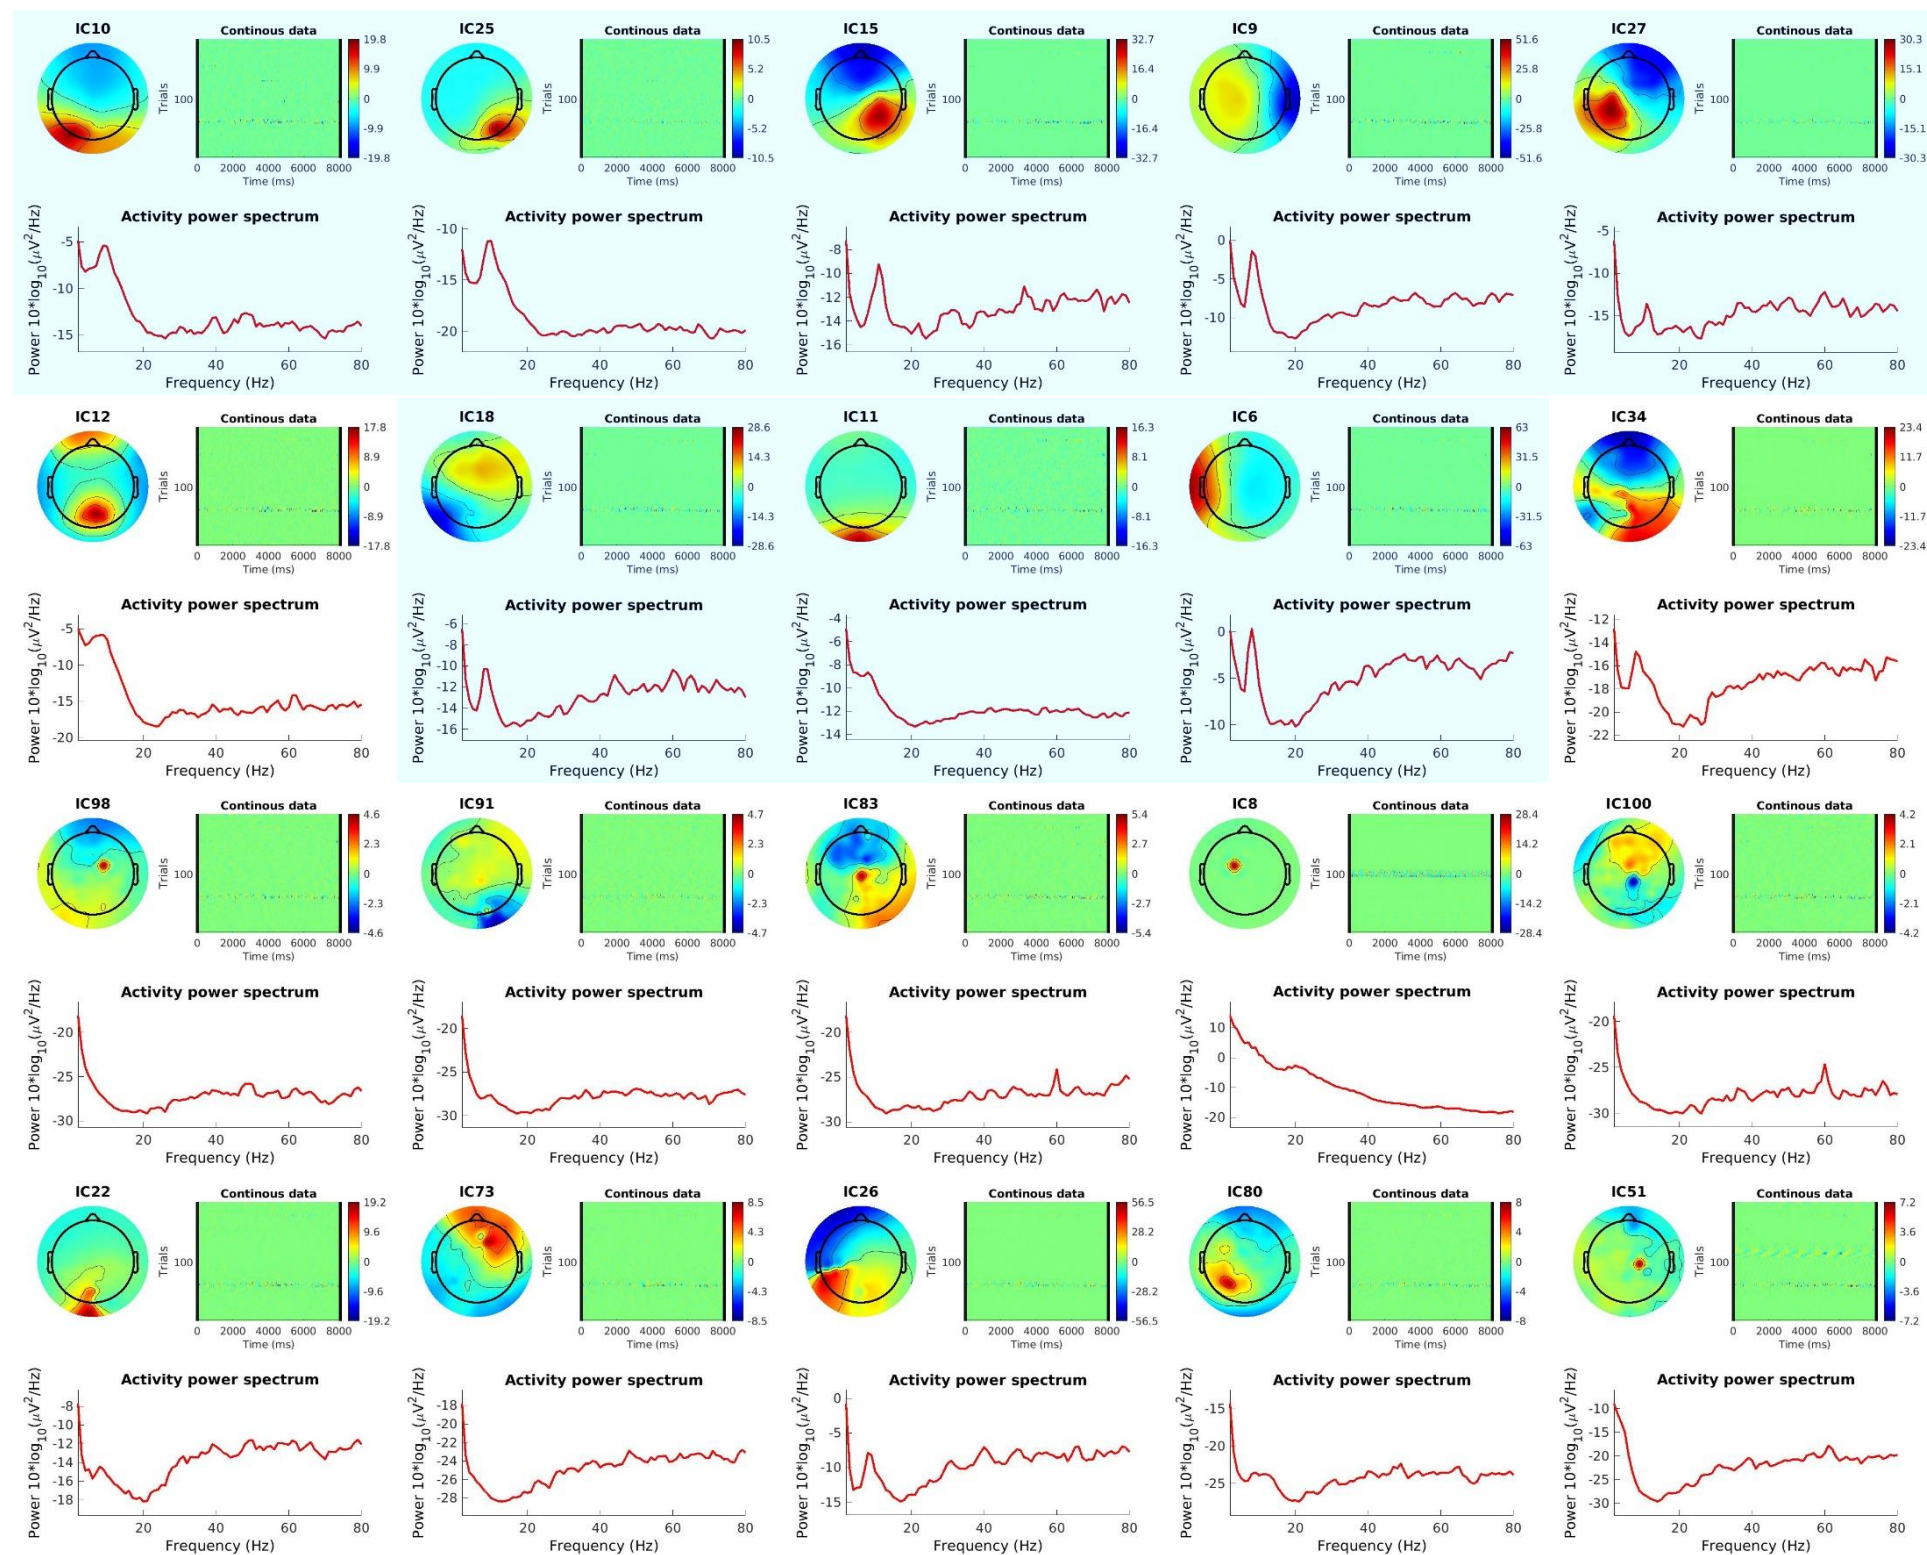

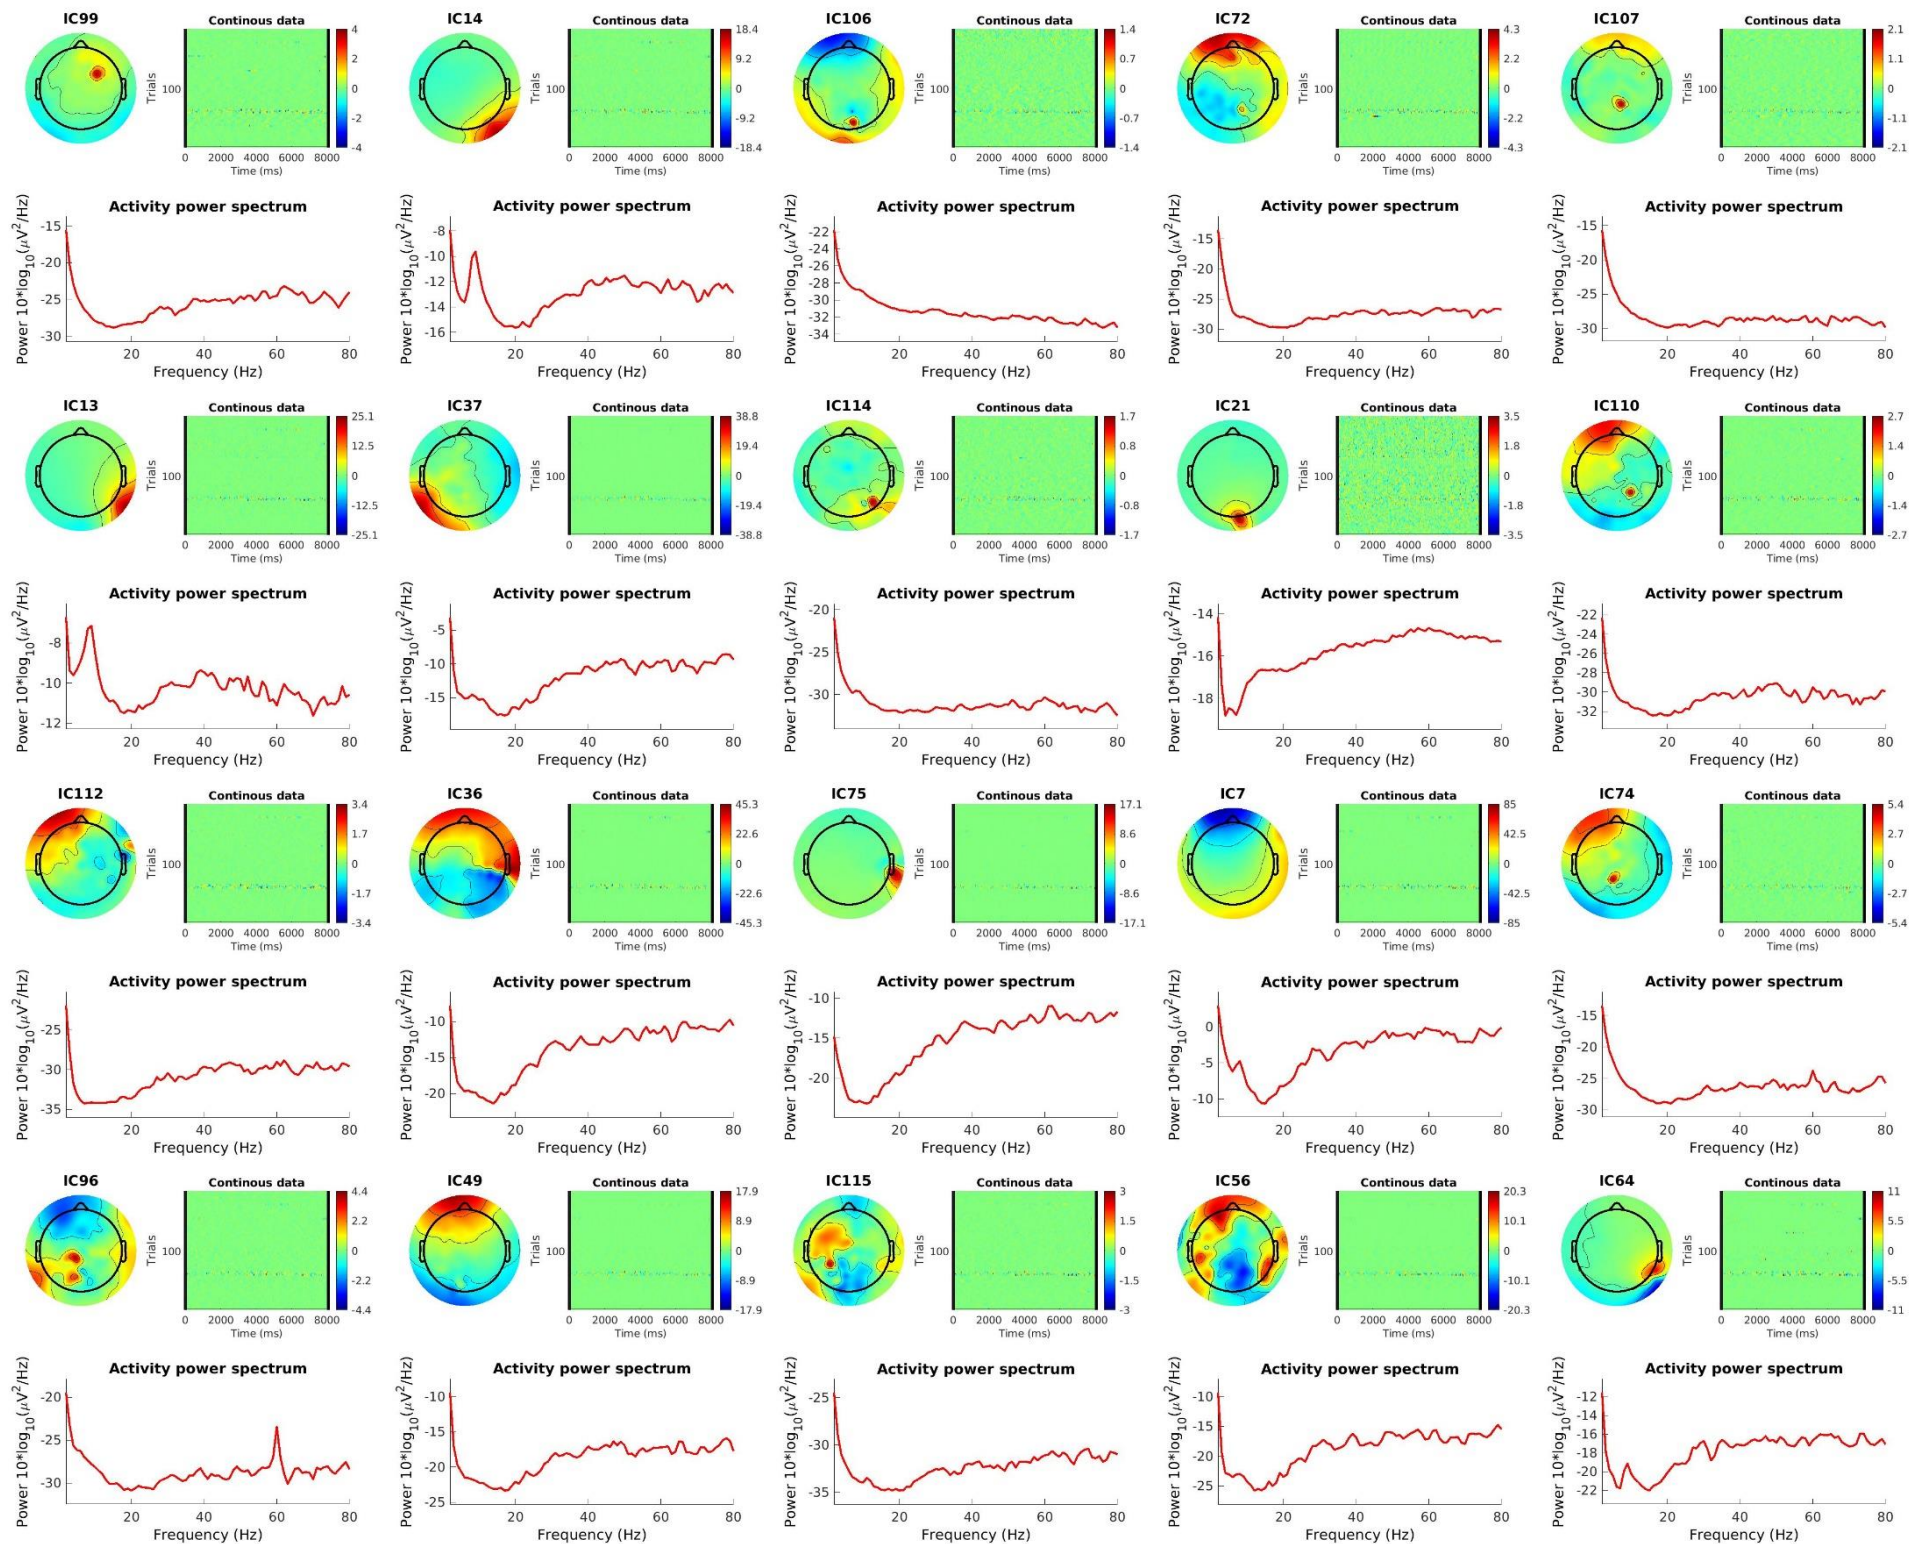



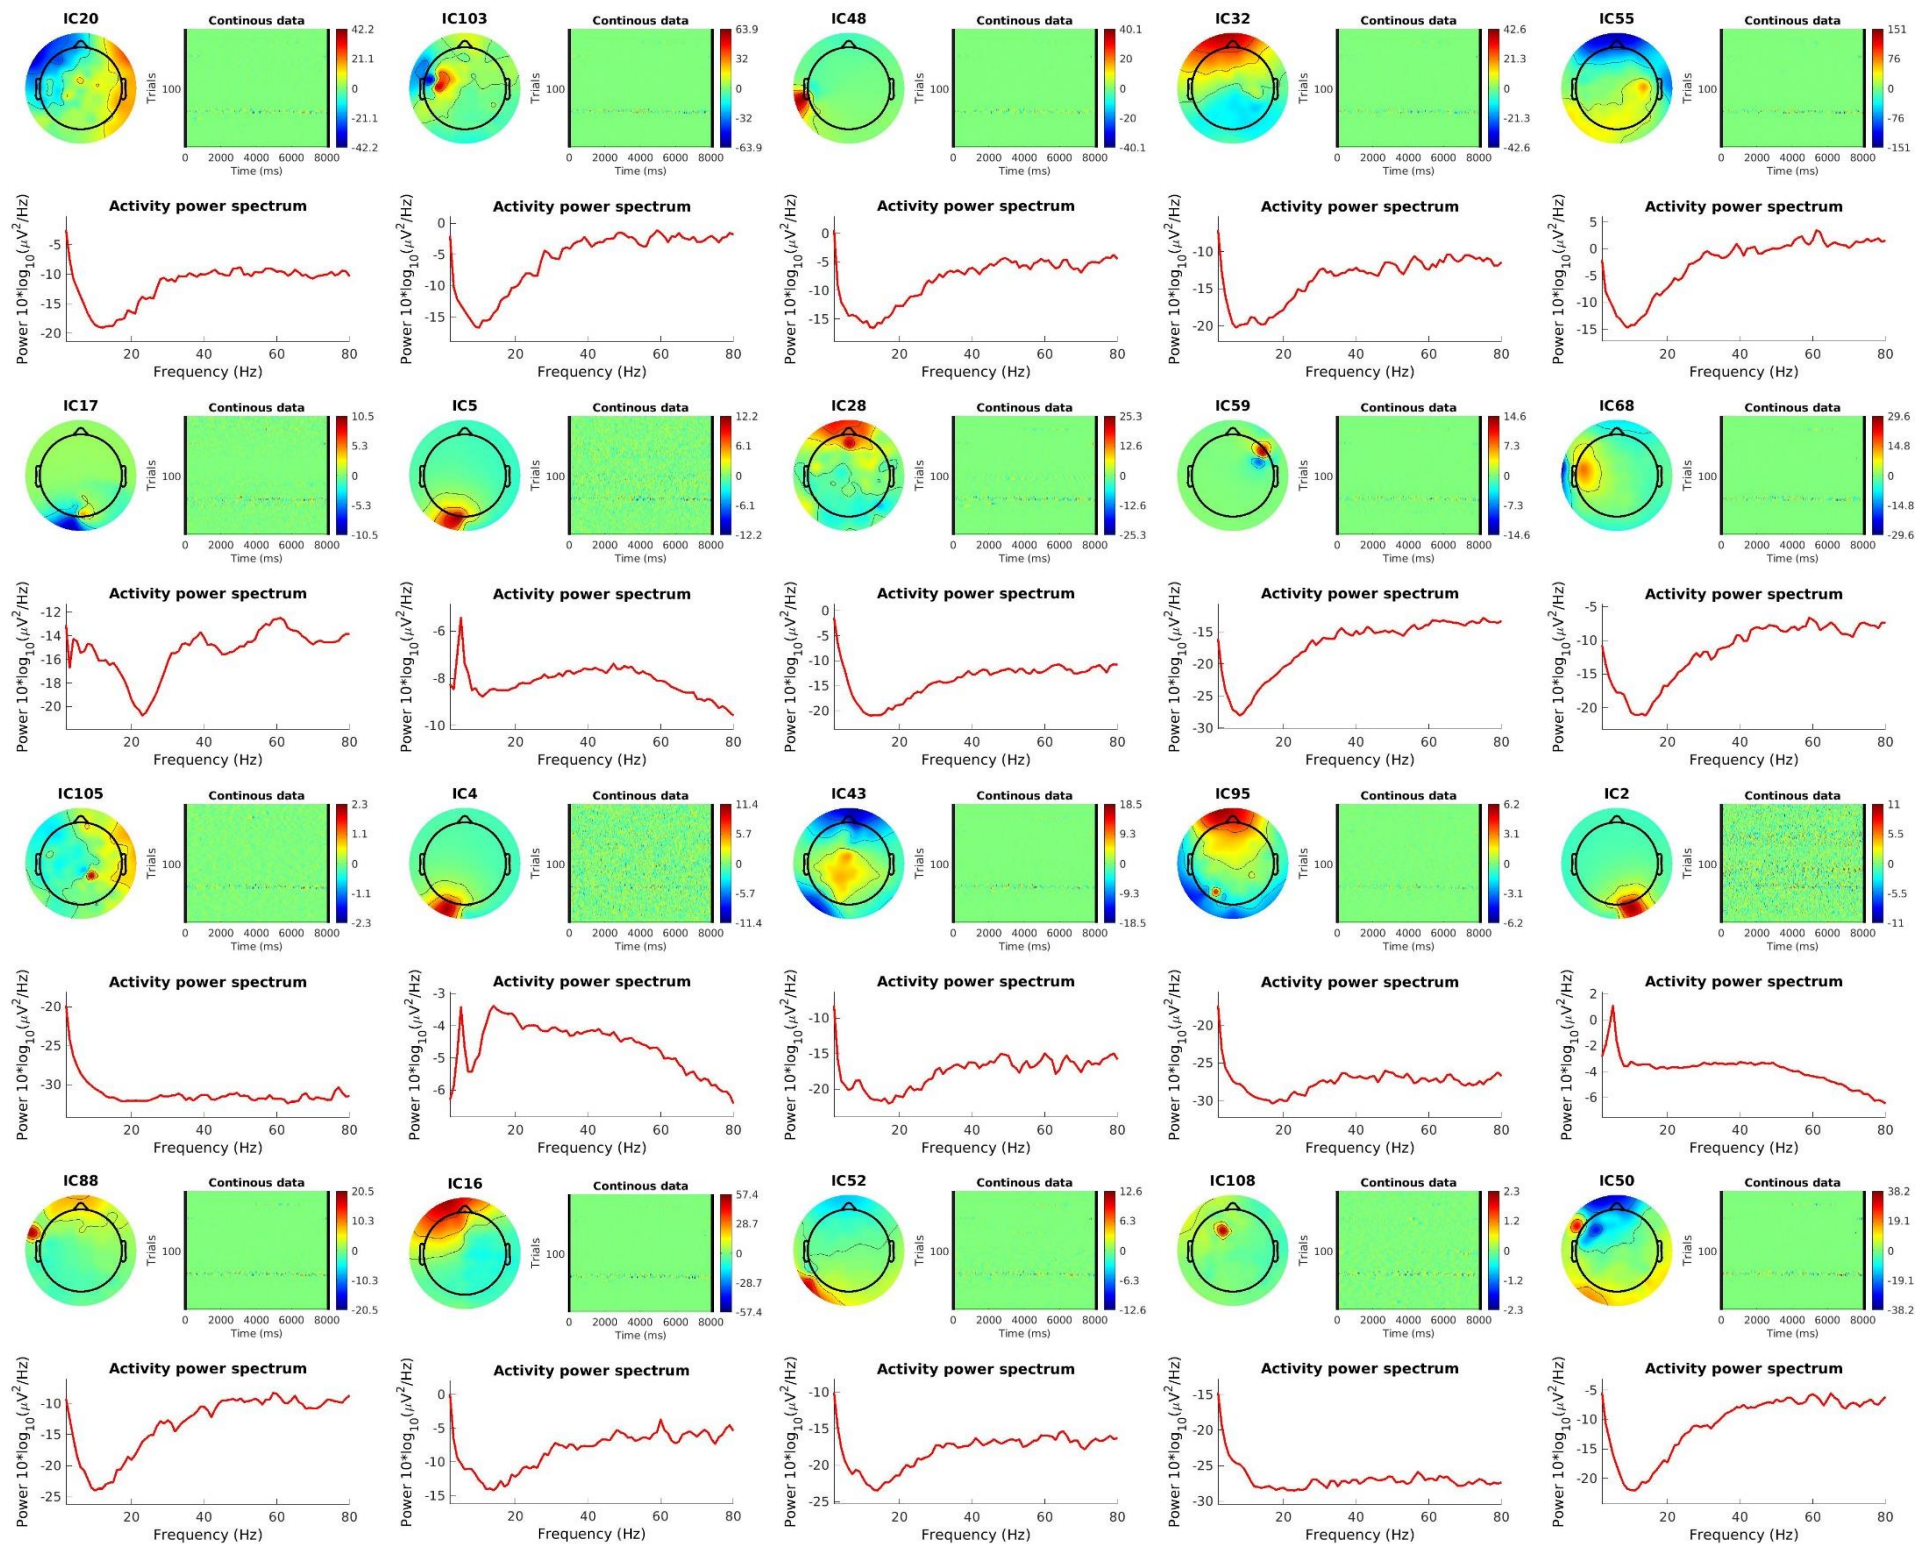

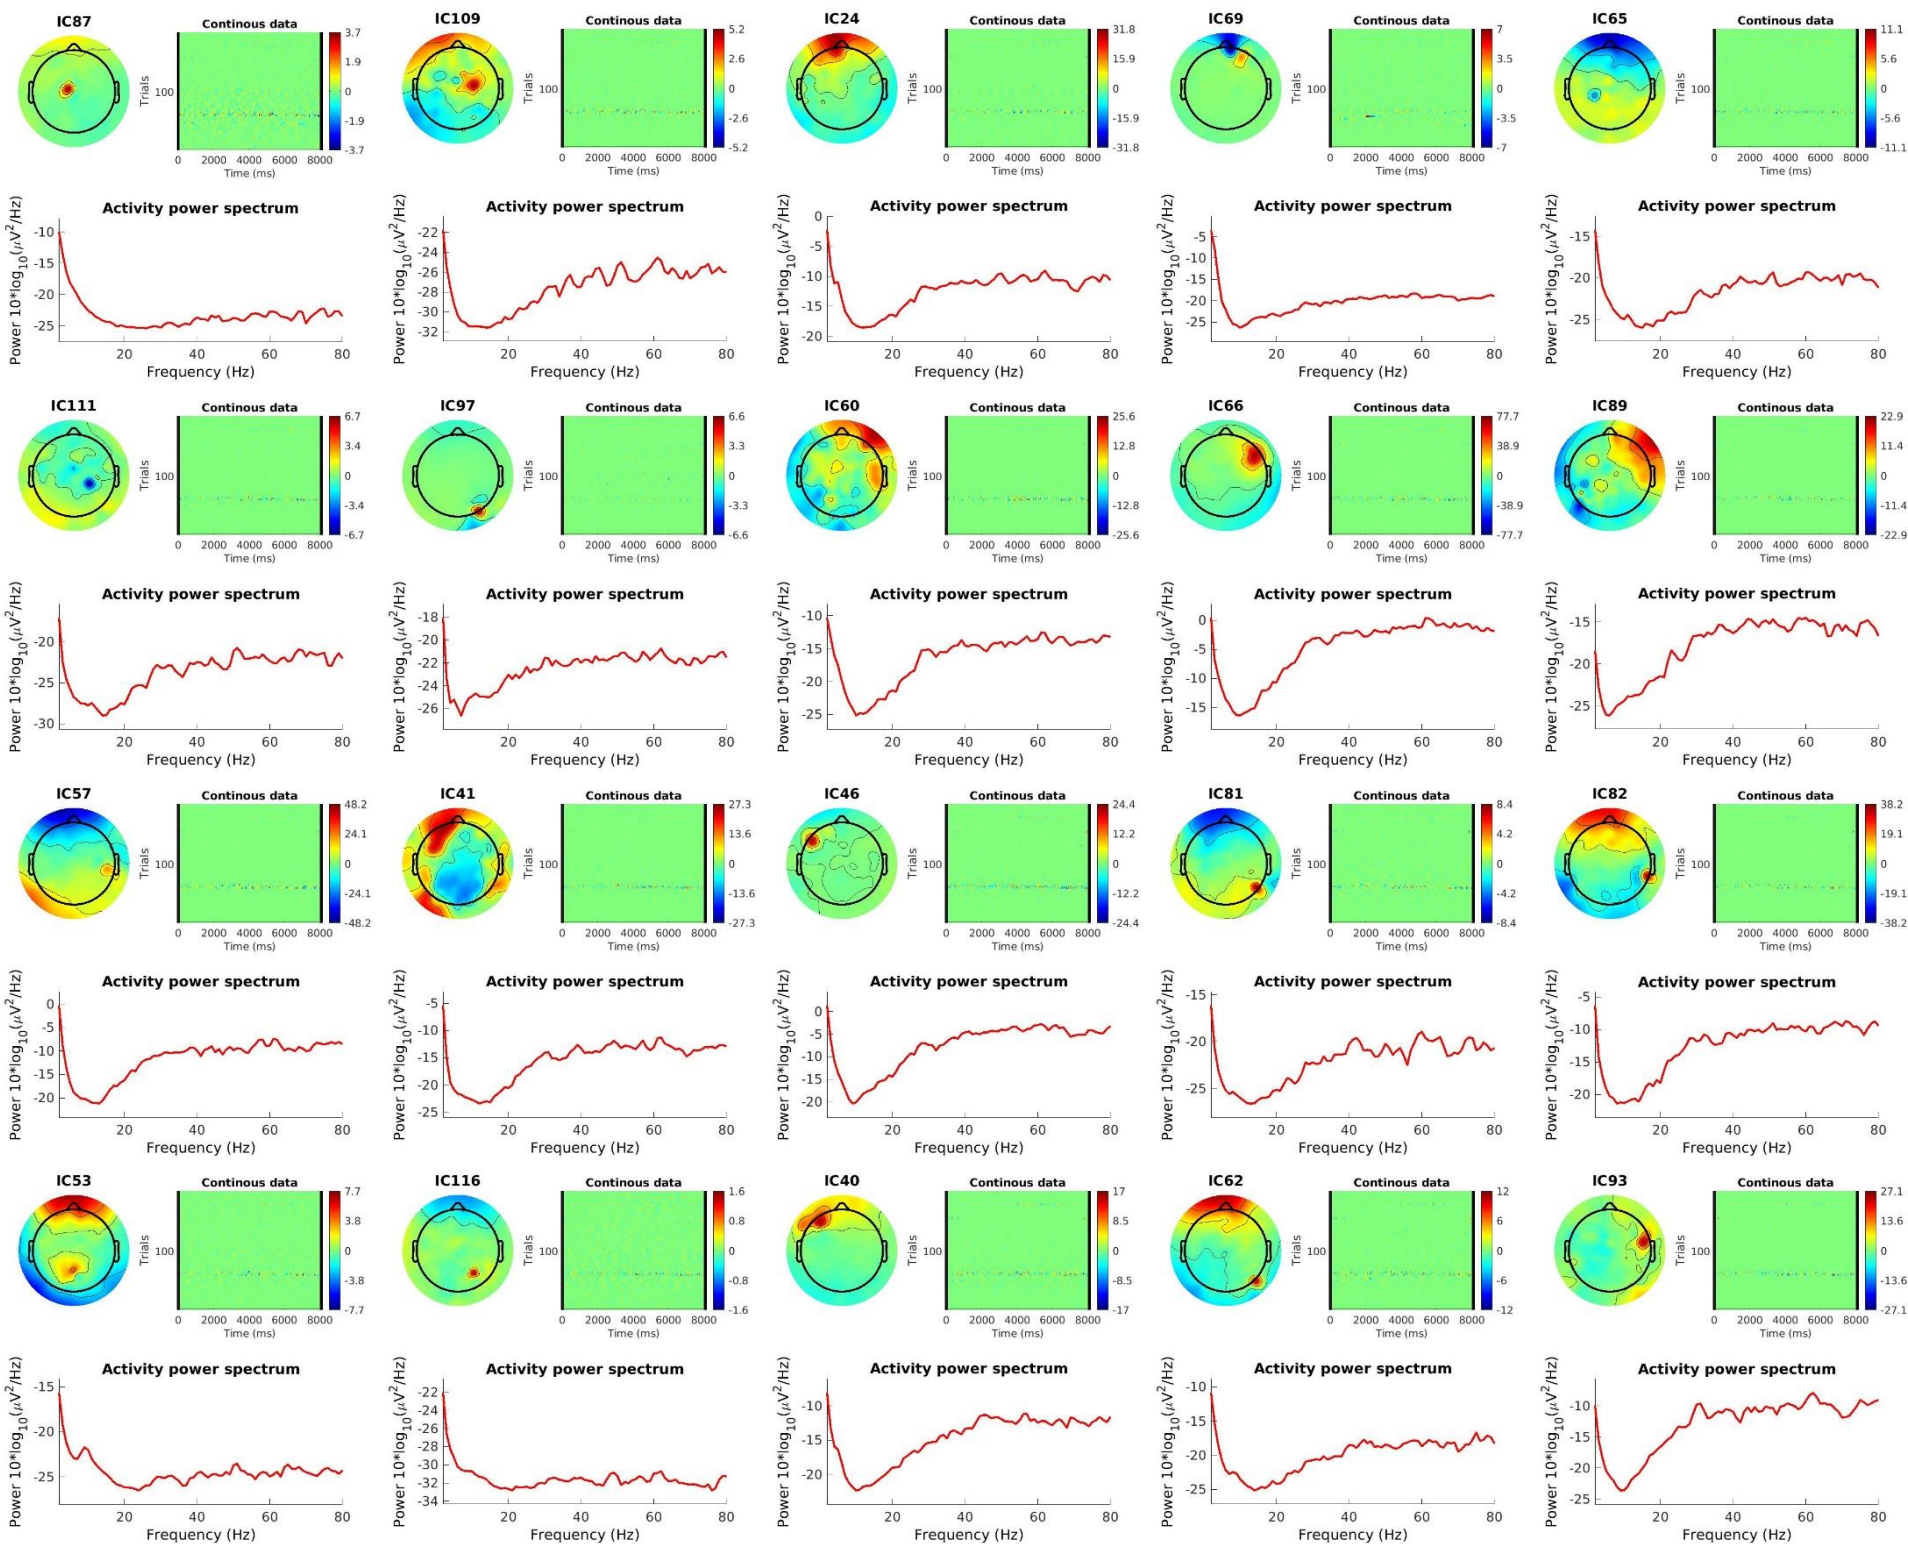



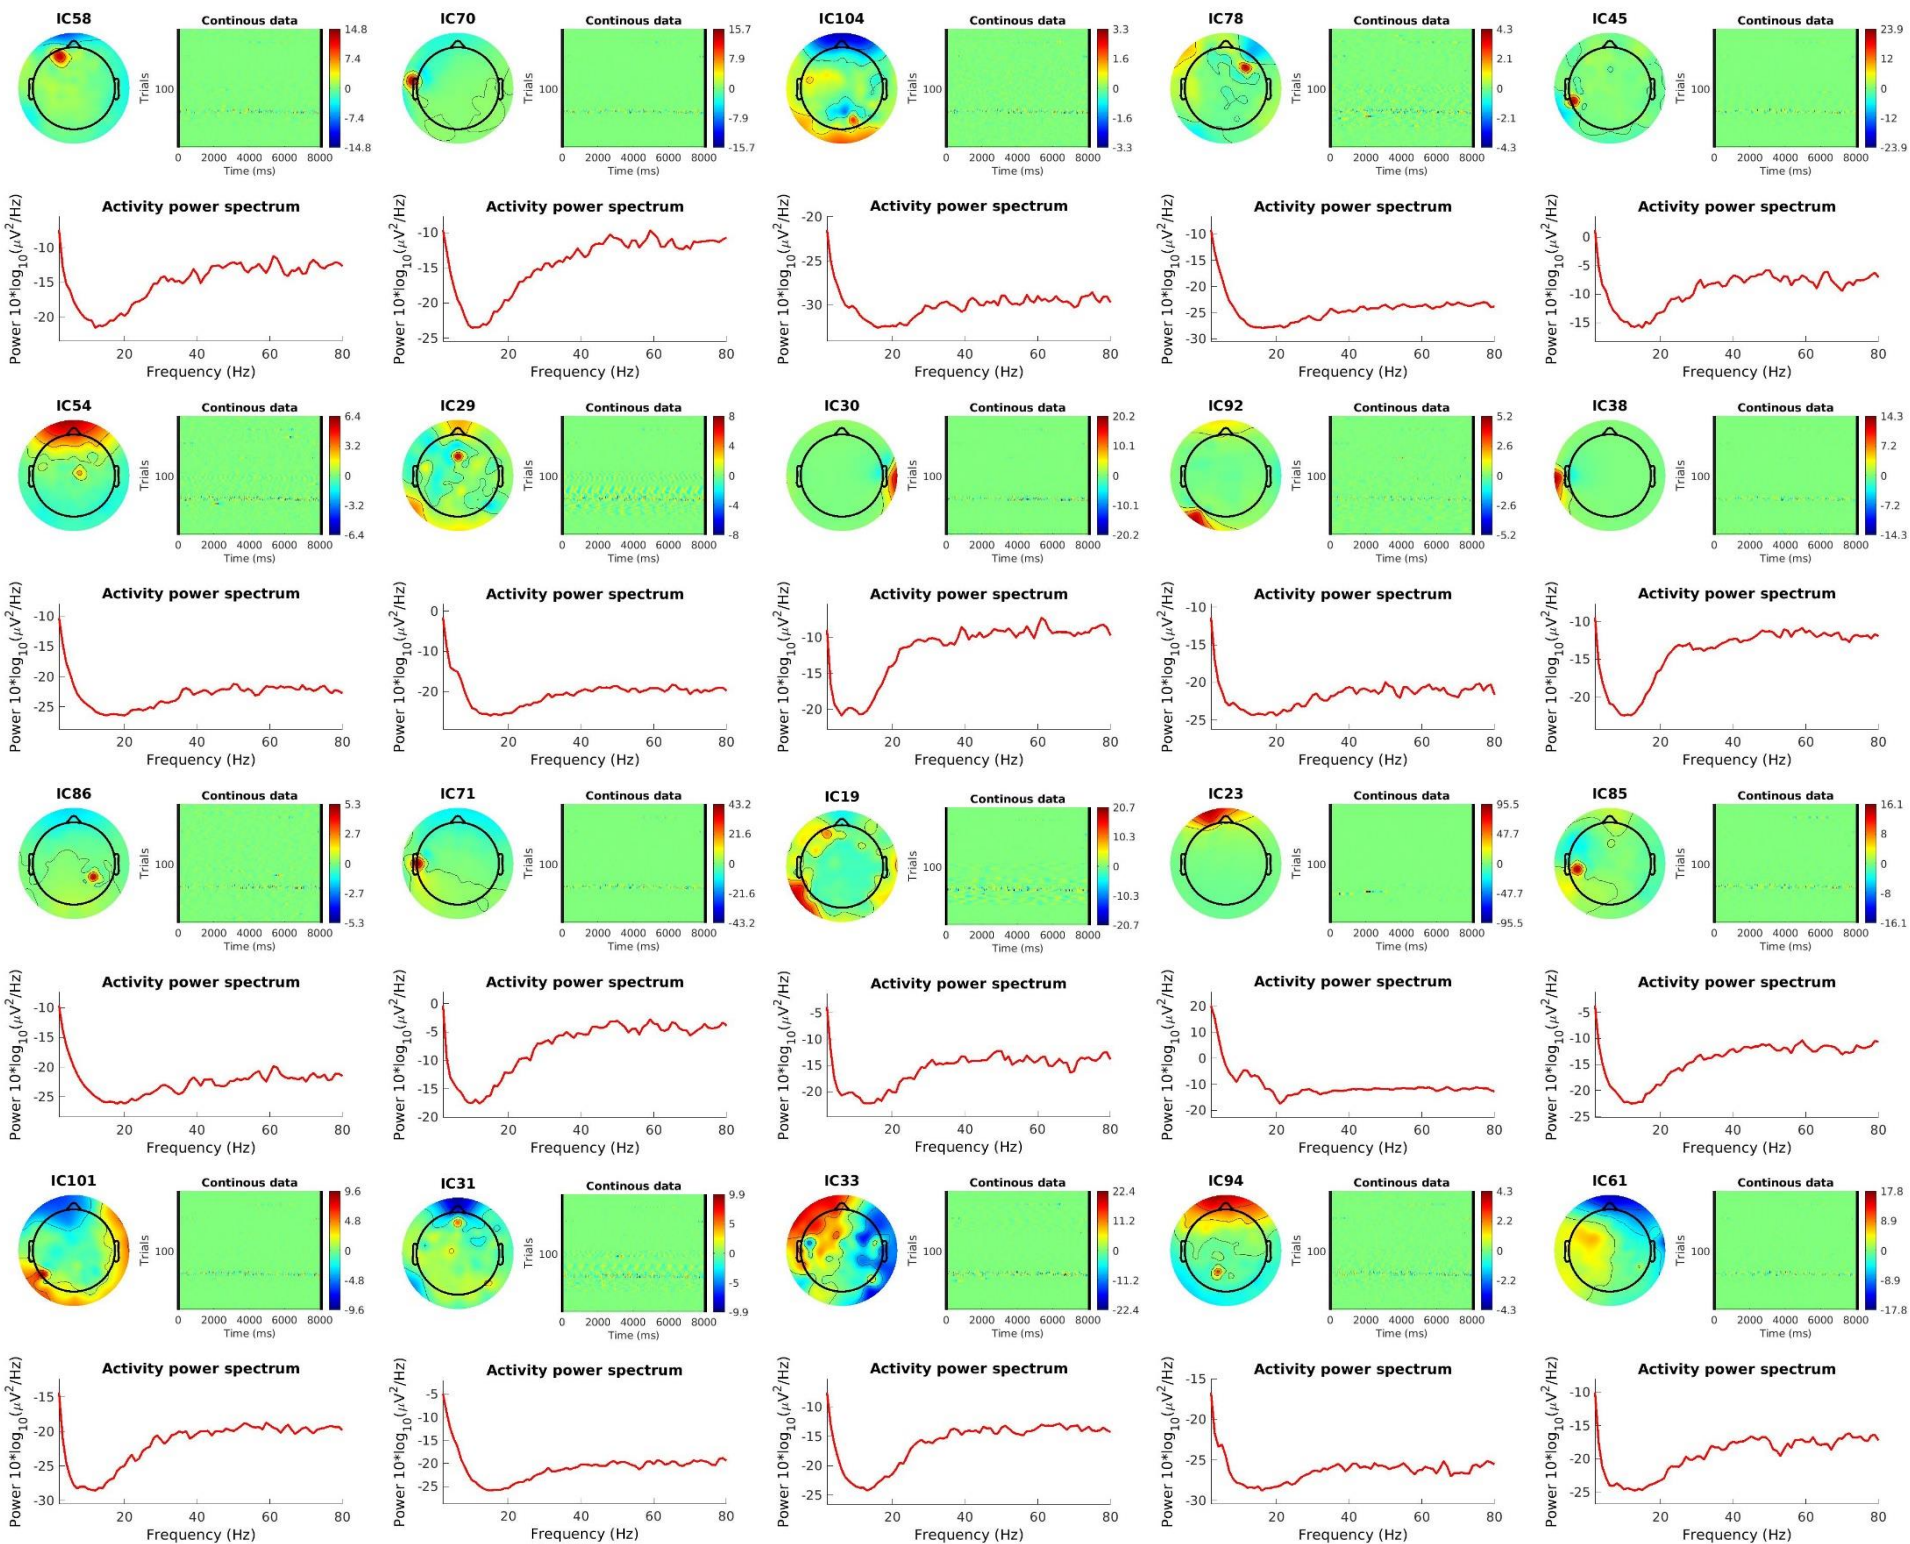

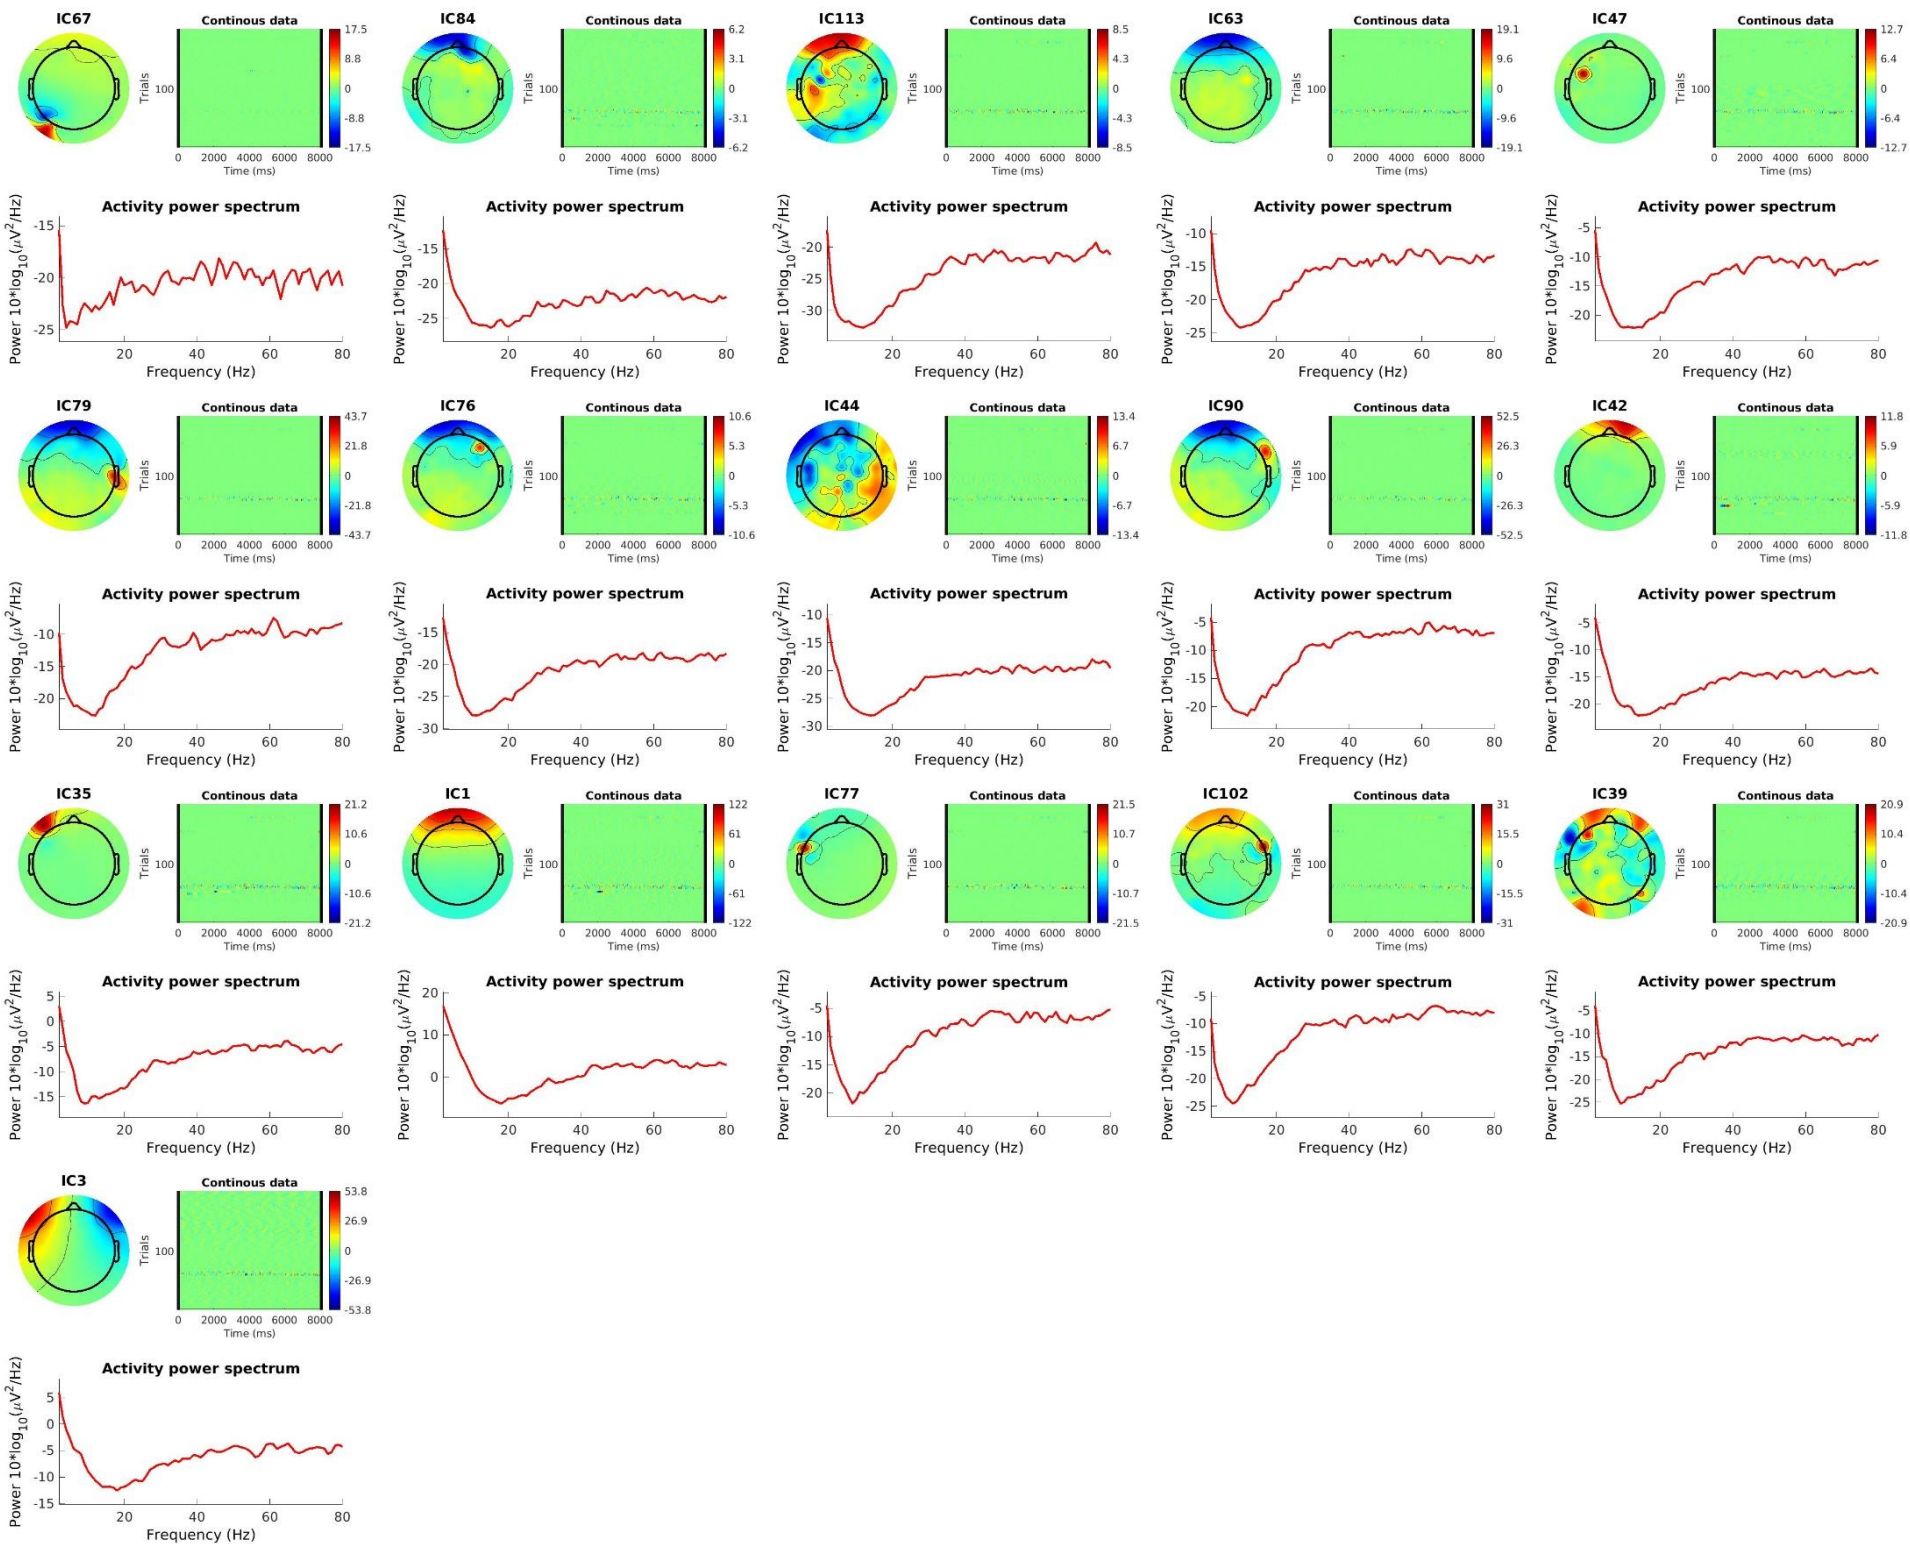



# Low Functioning Older Adult With iCanClean

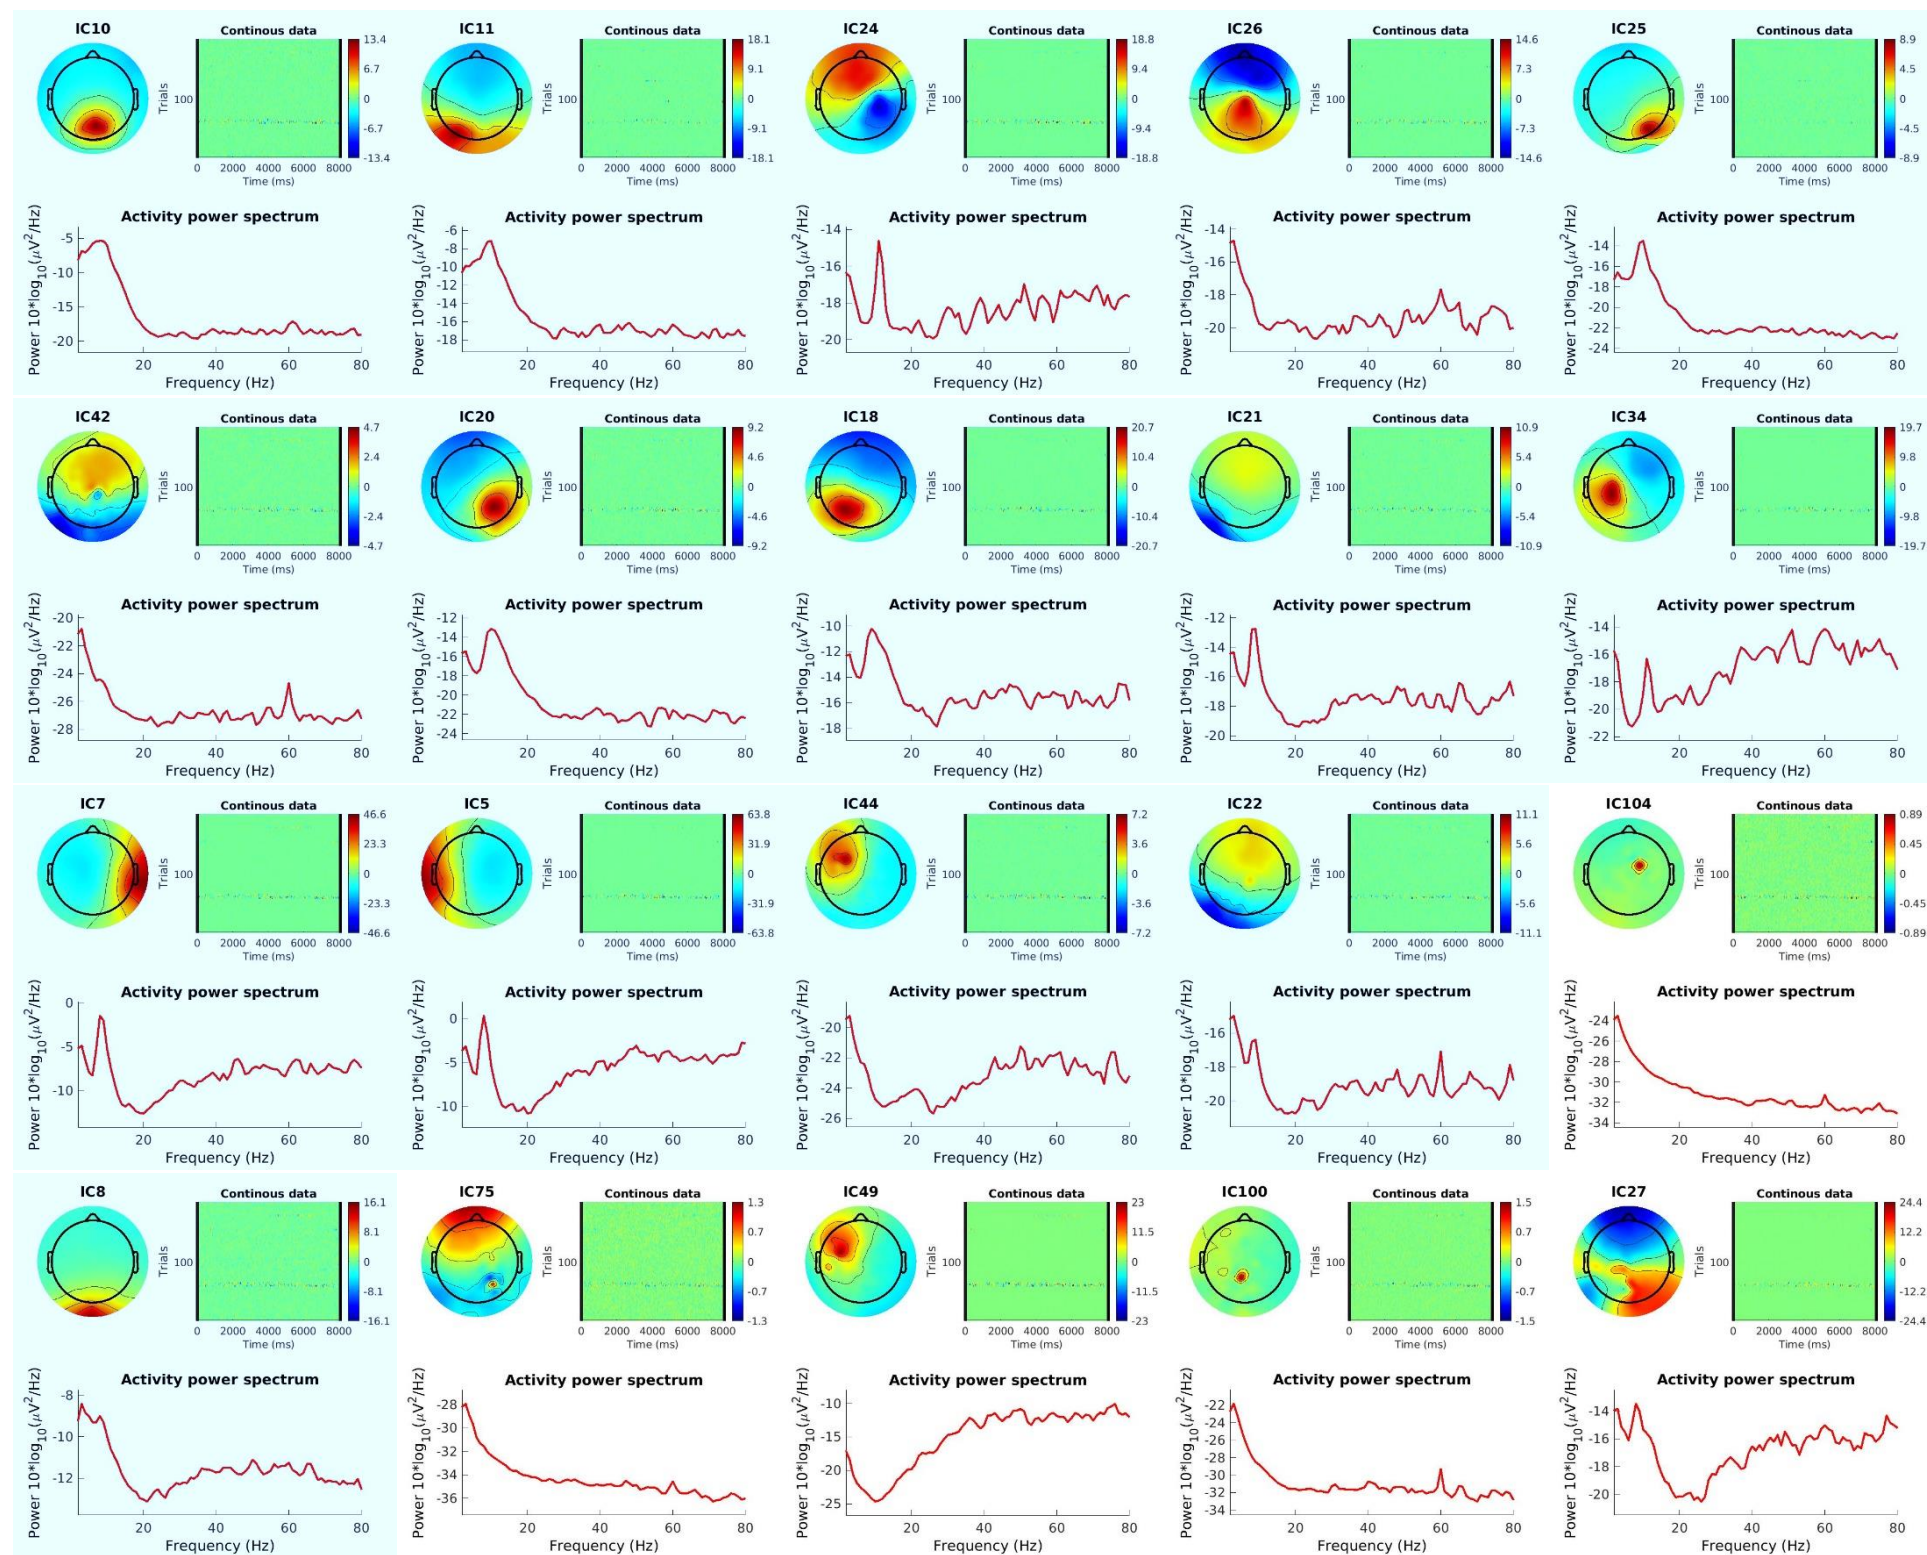

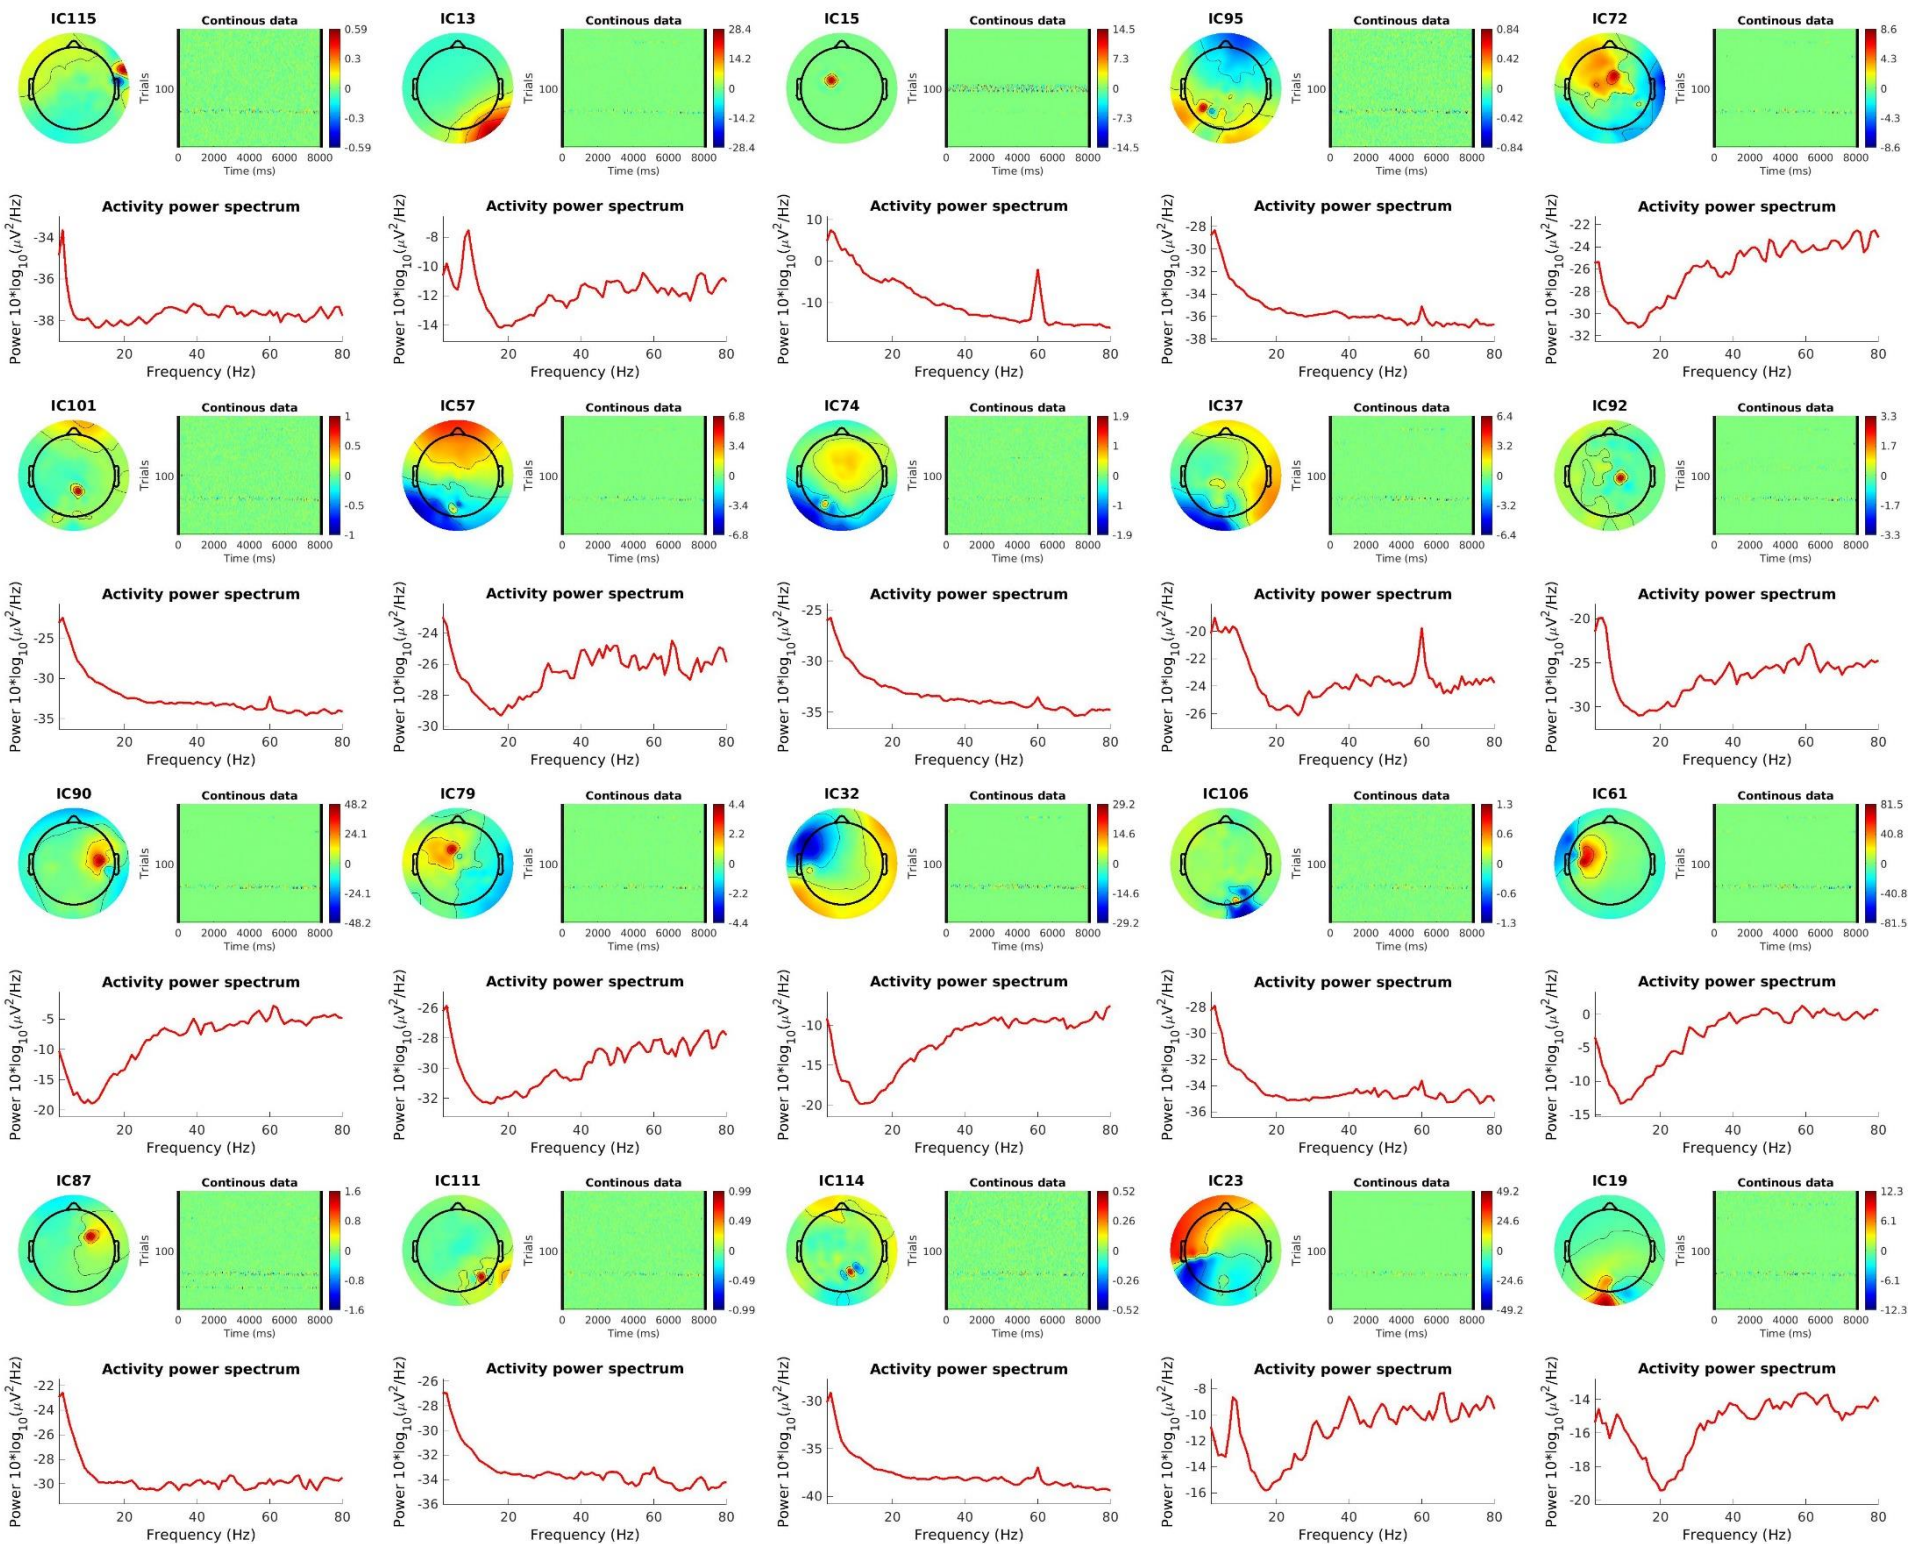



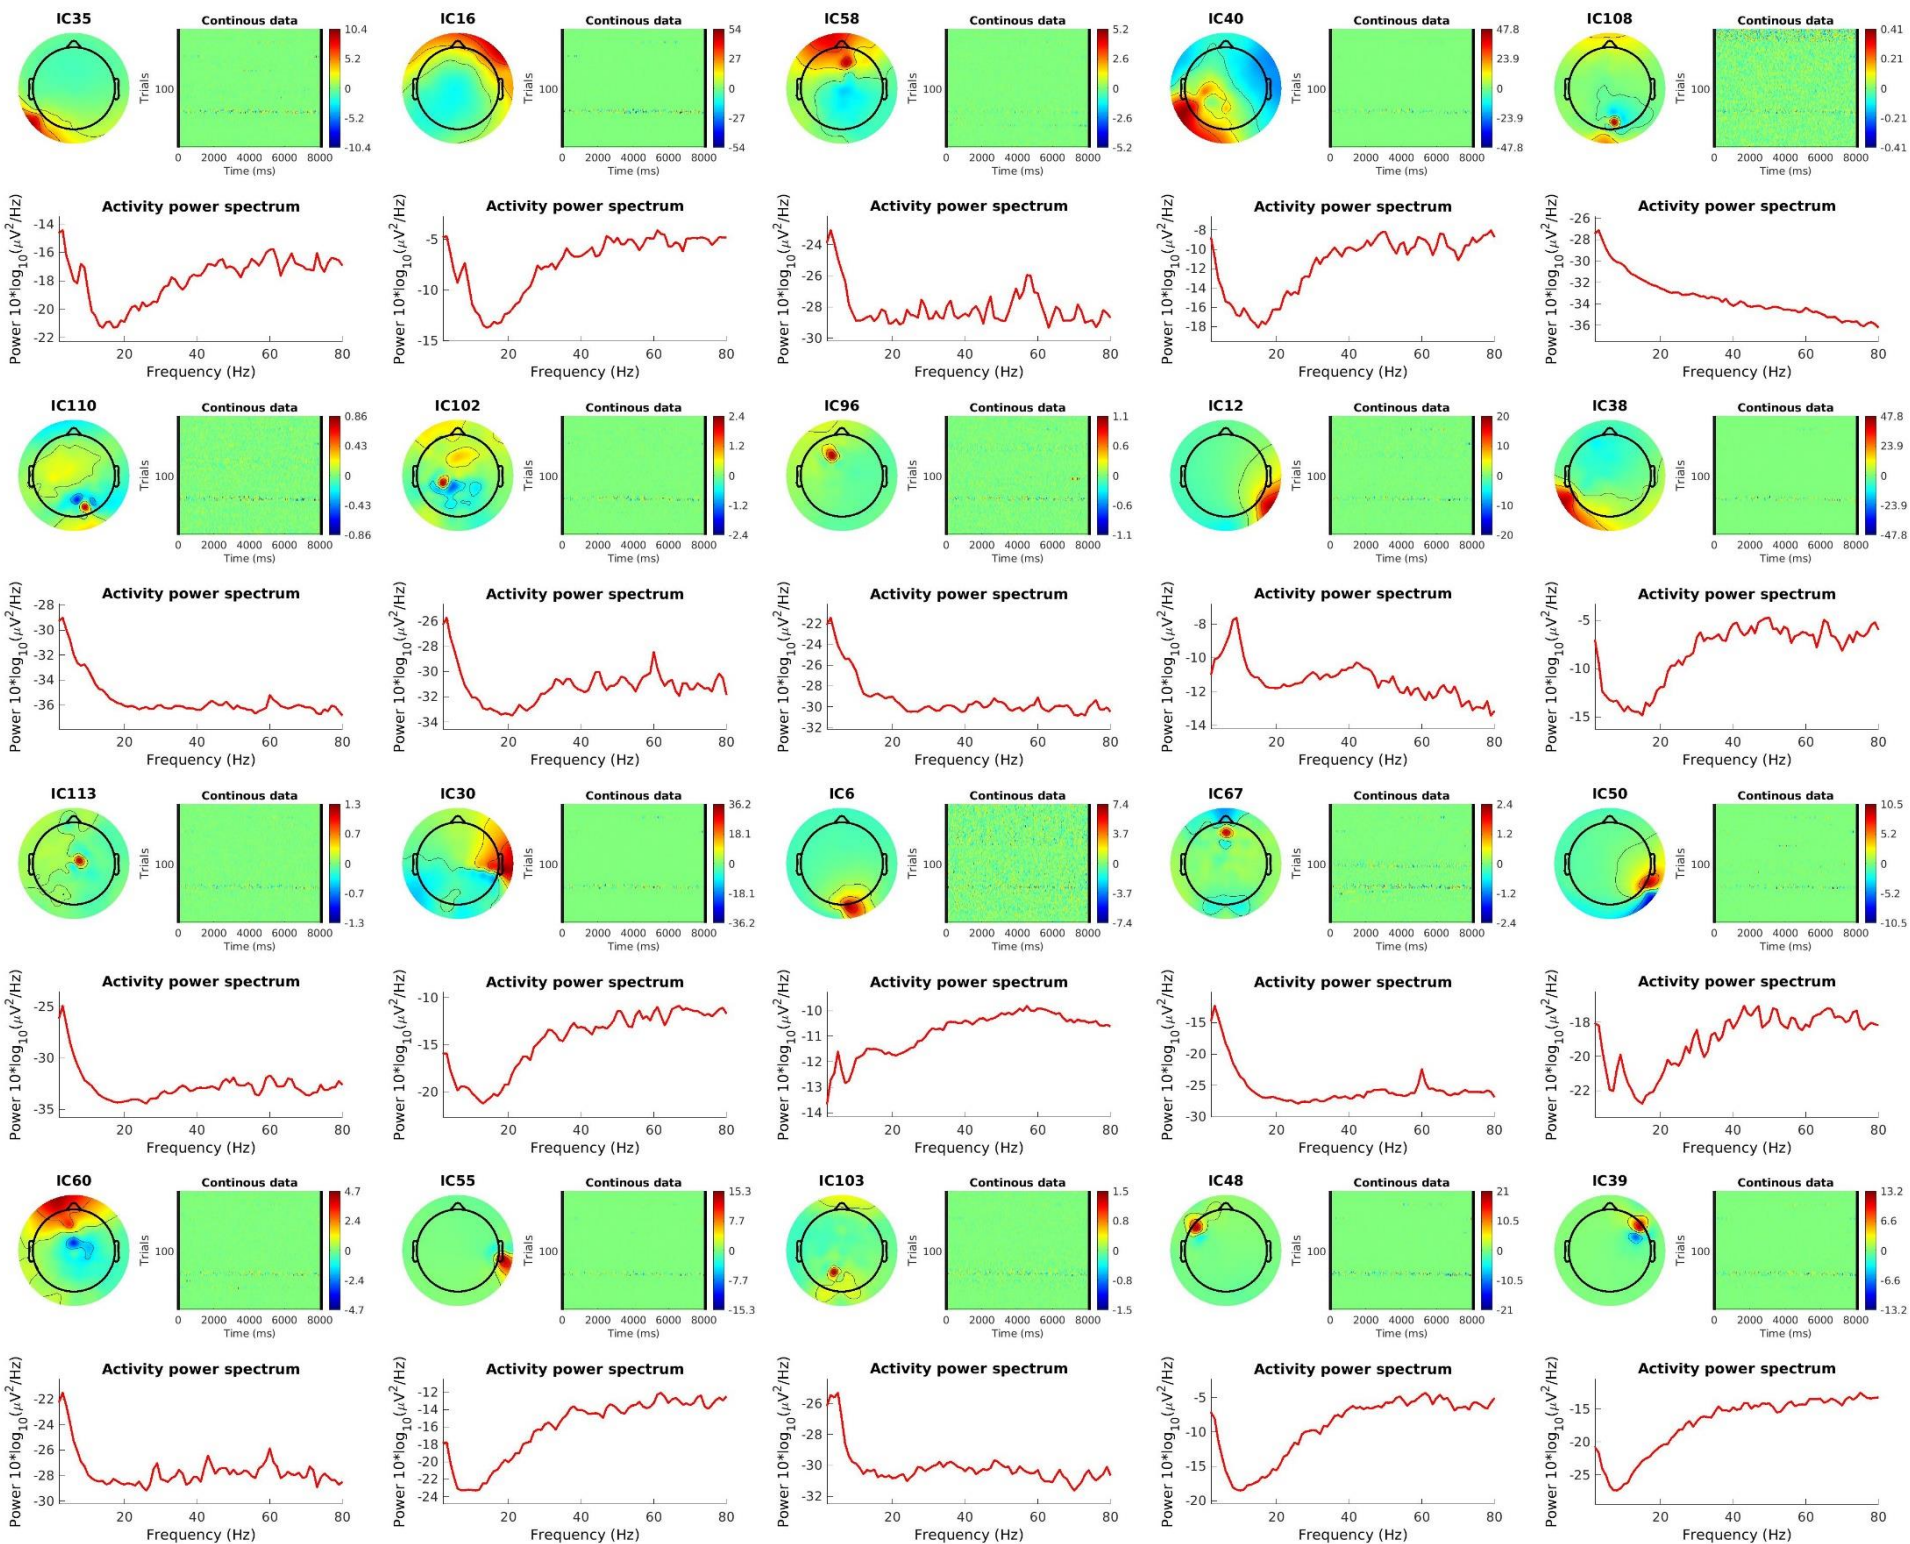

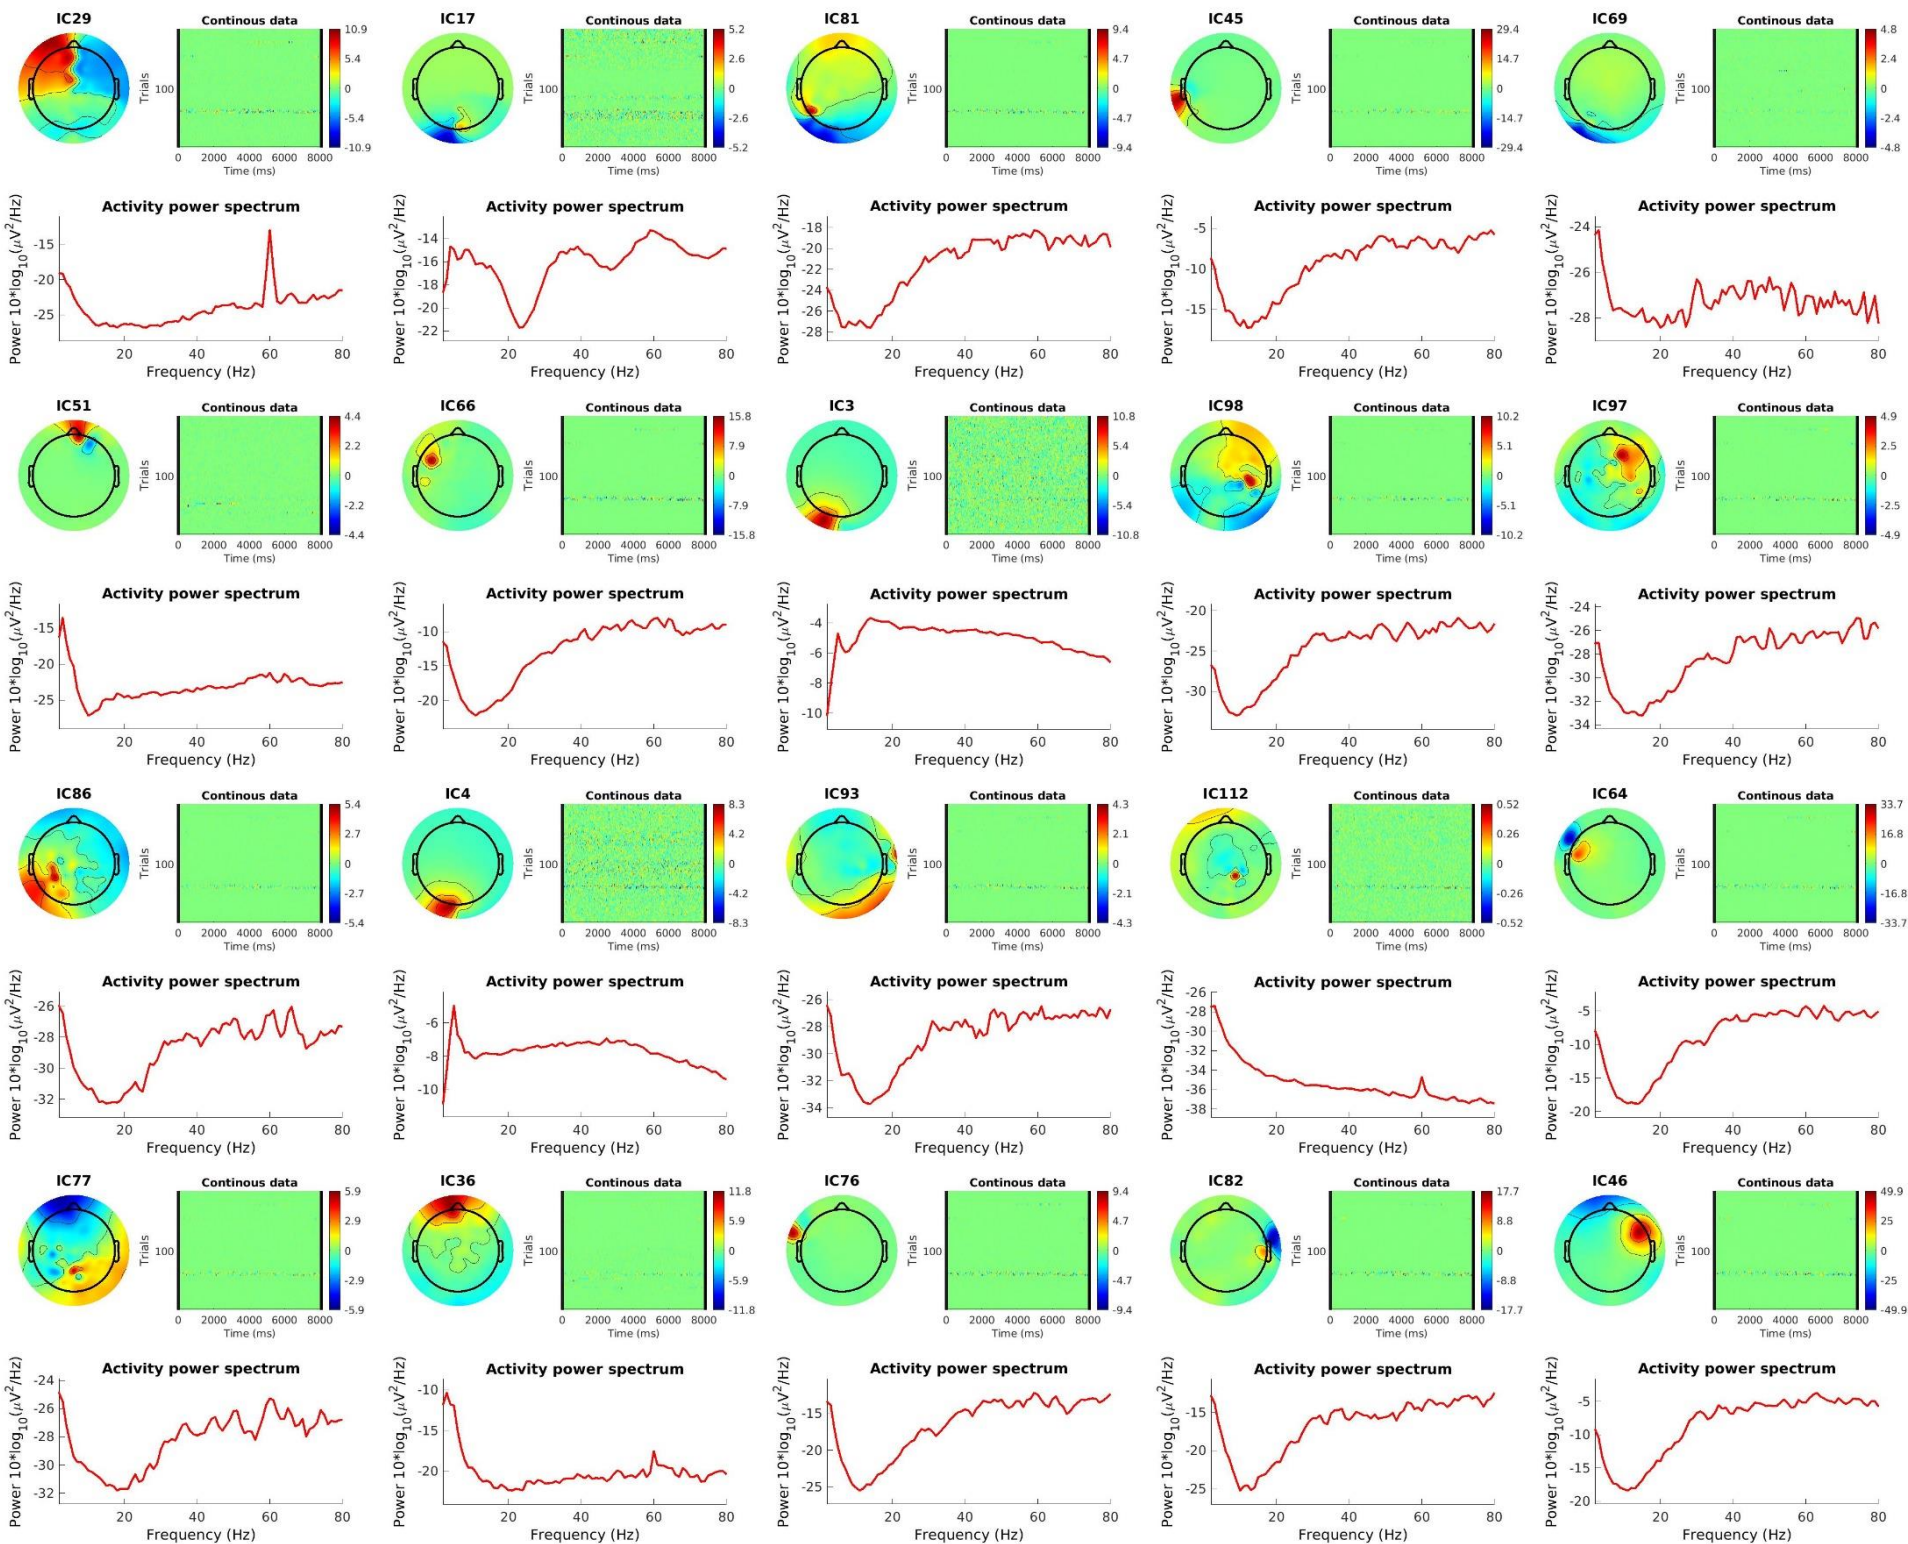



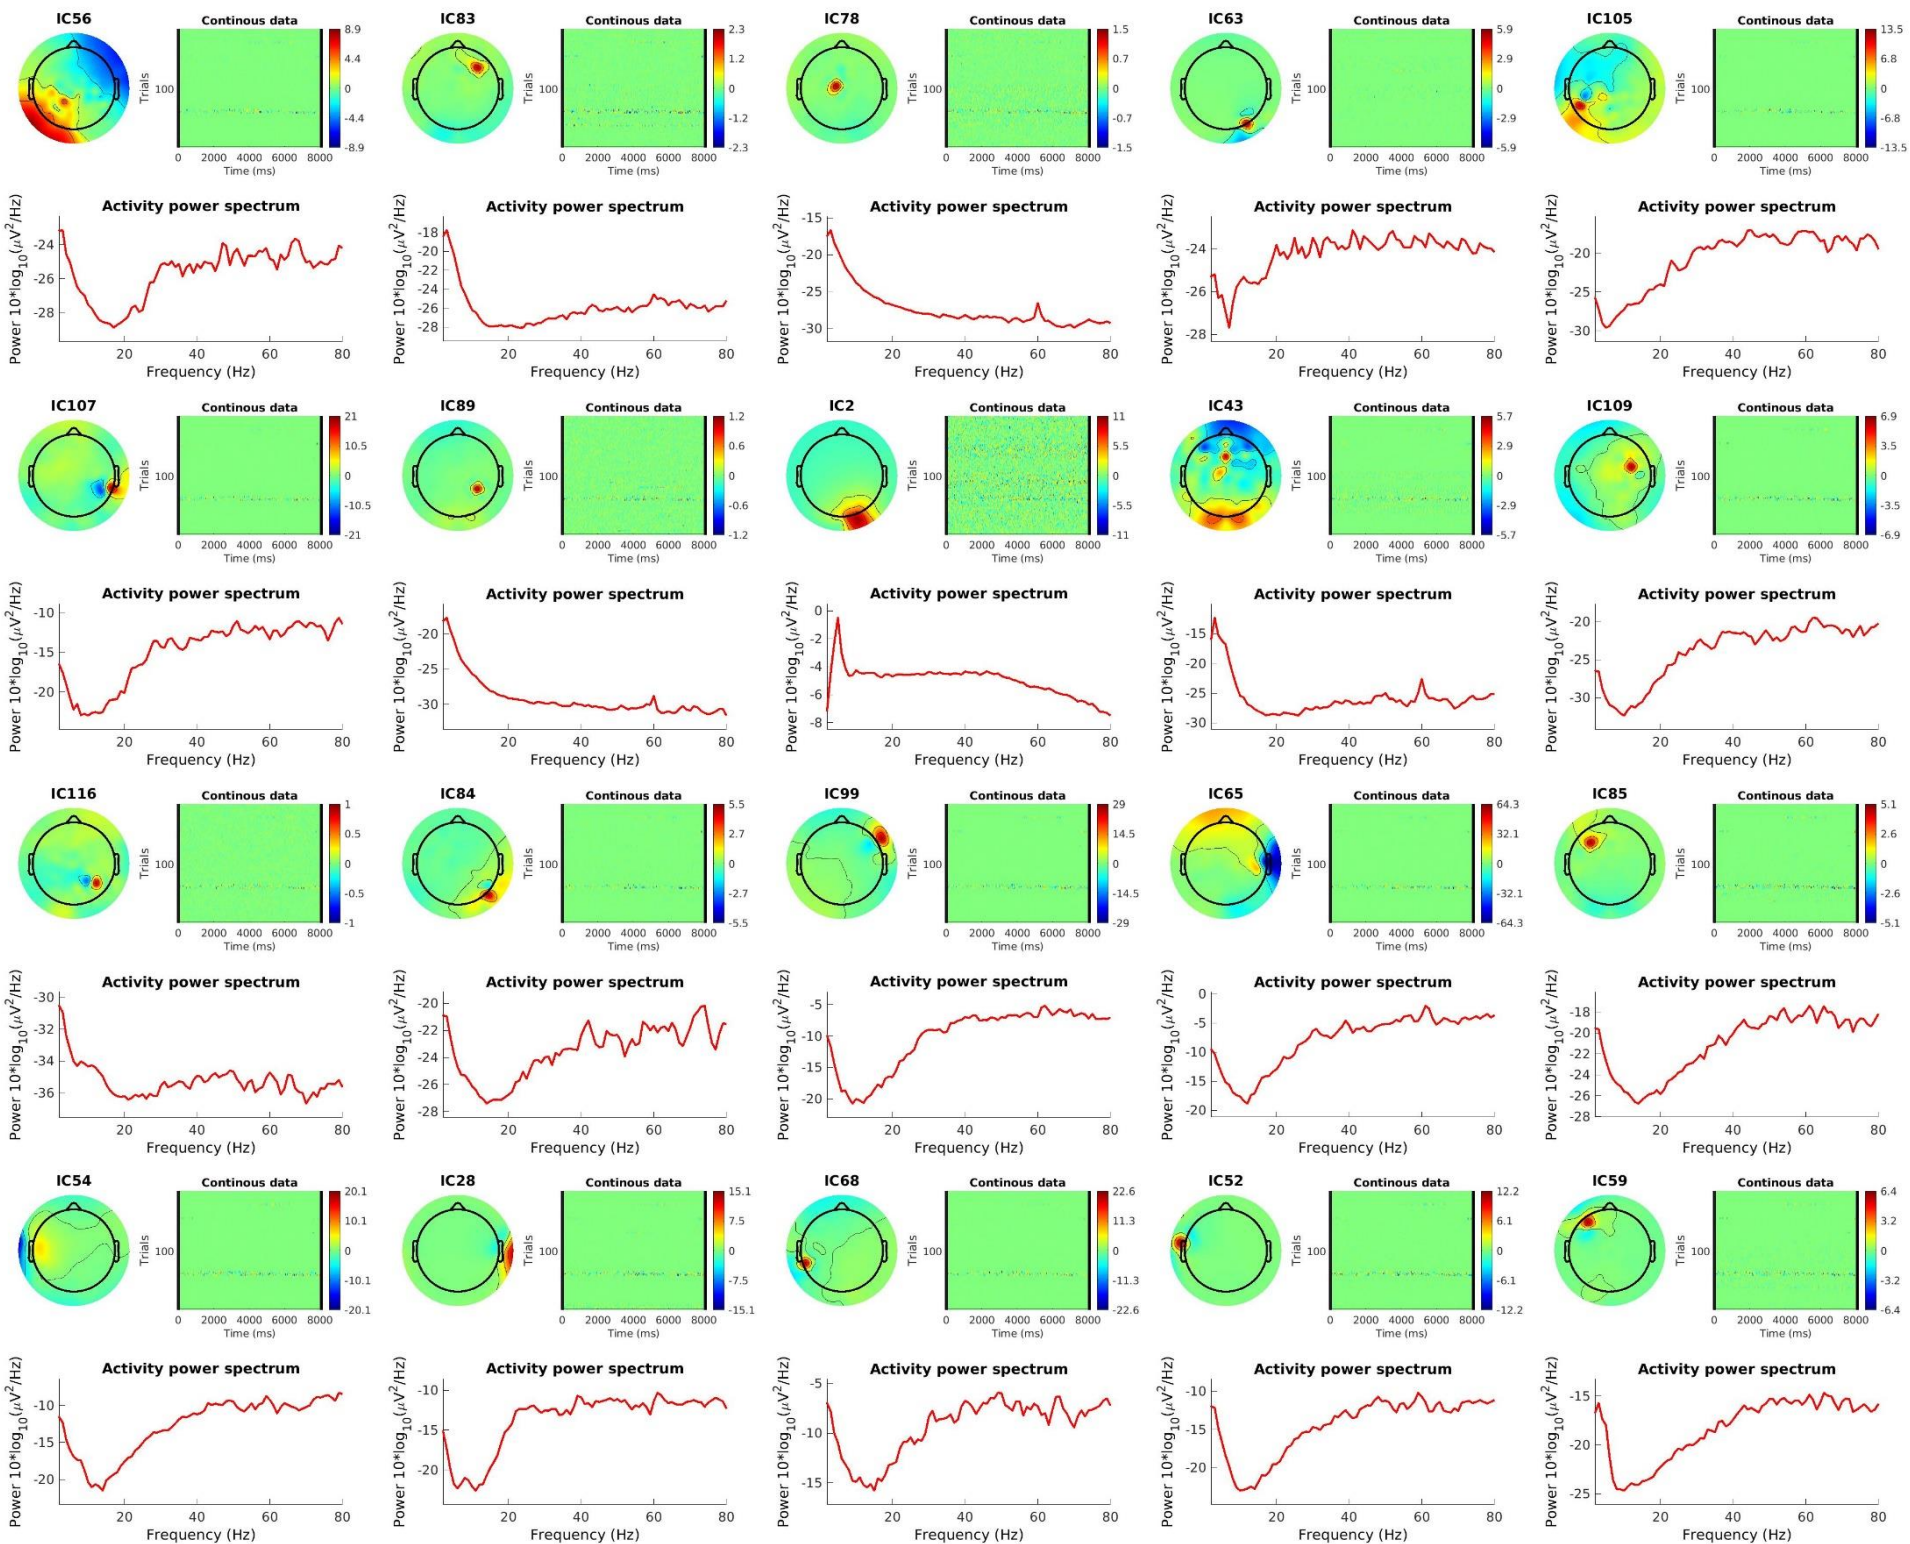

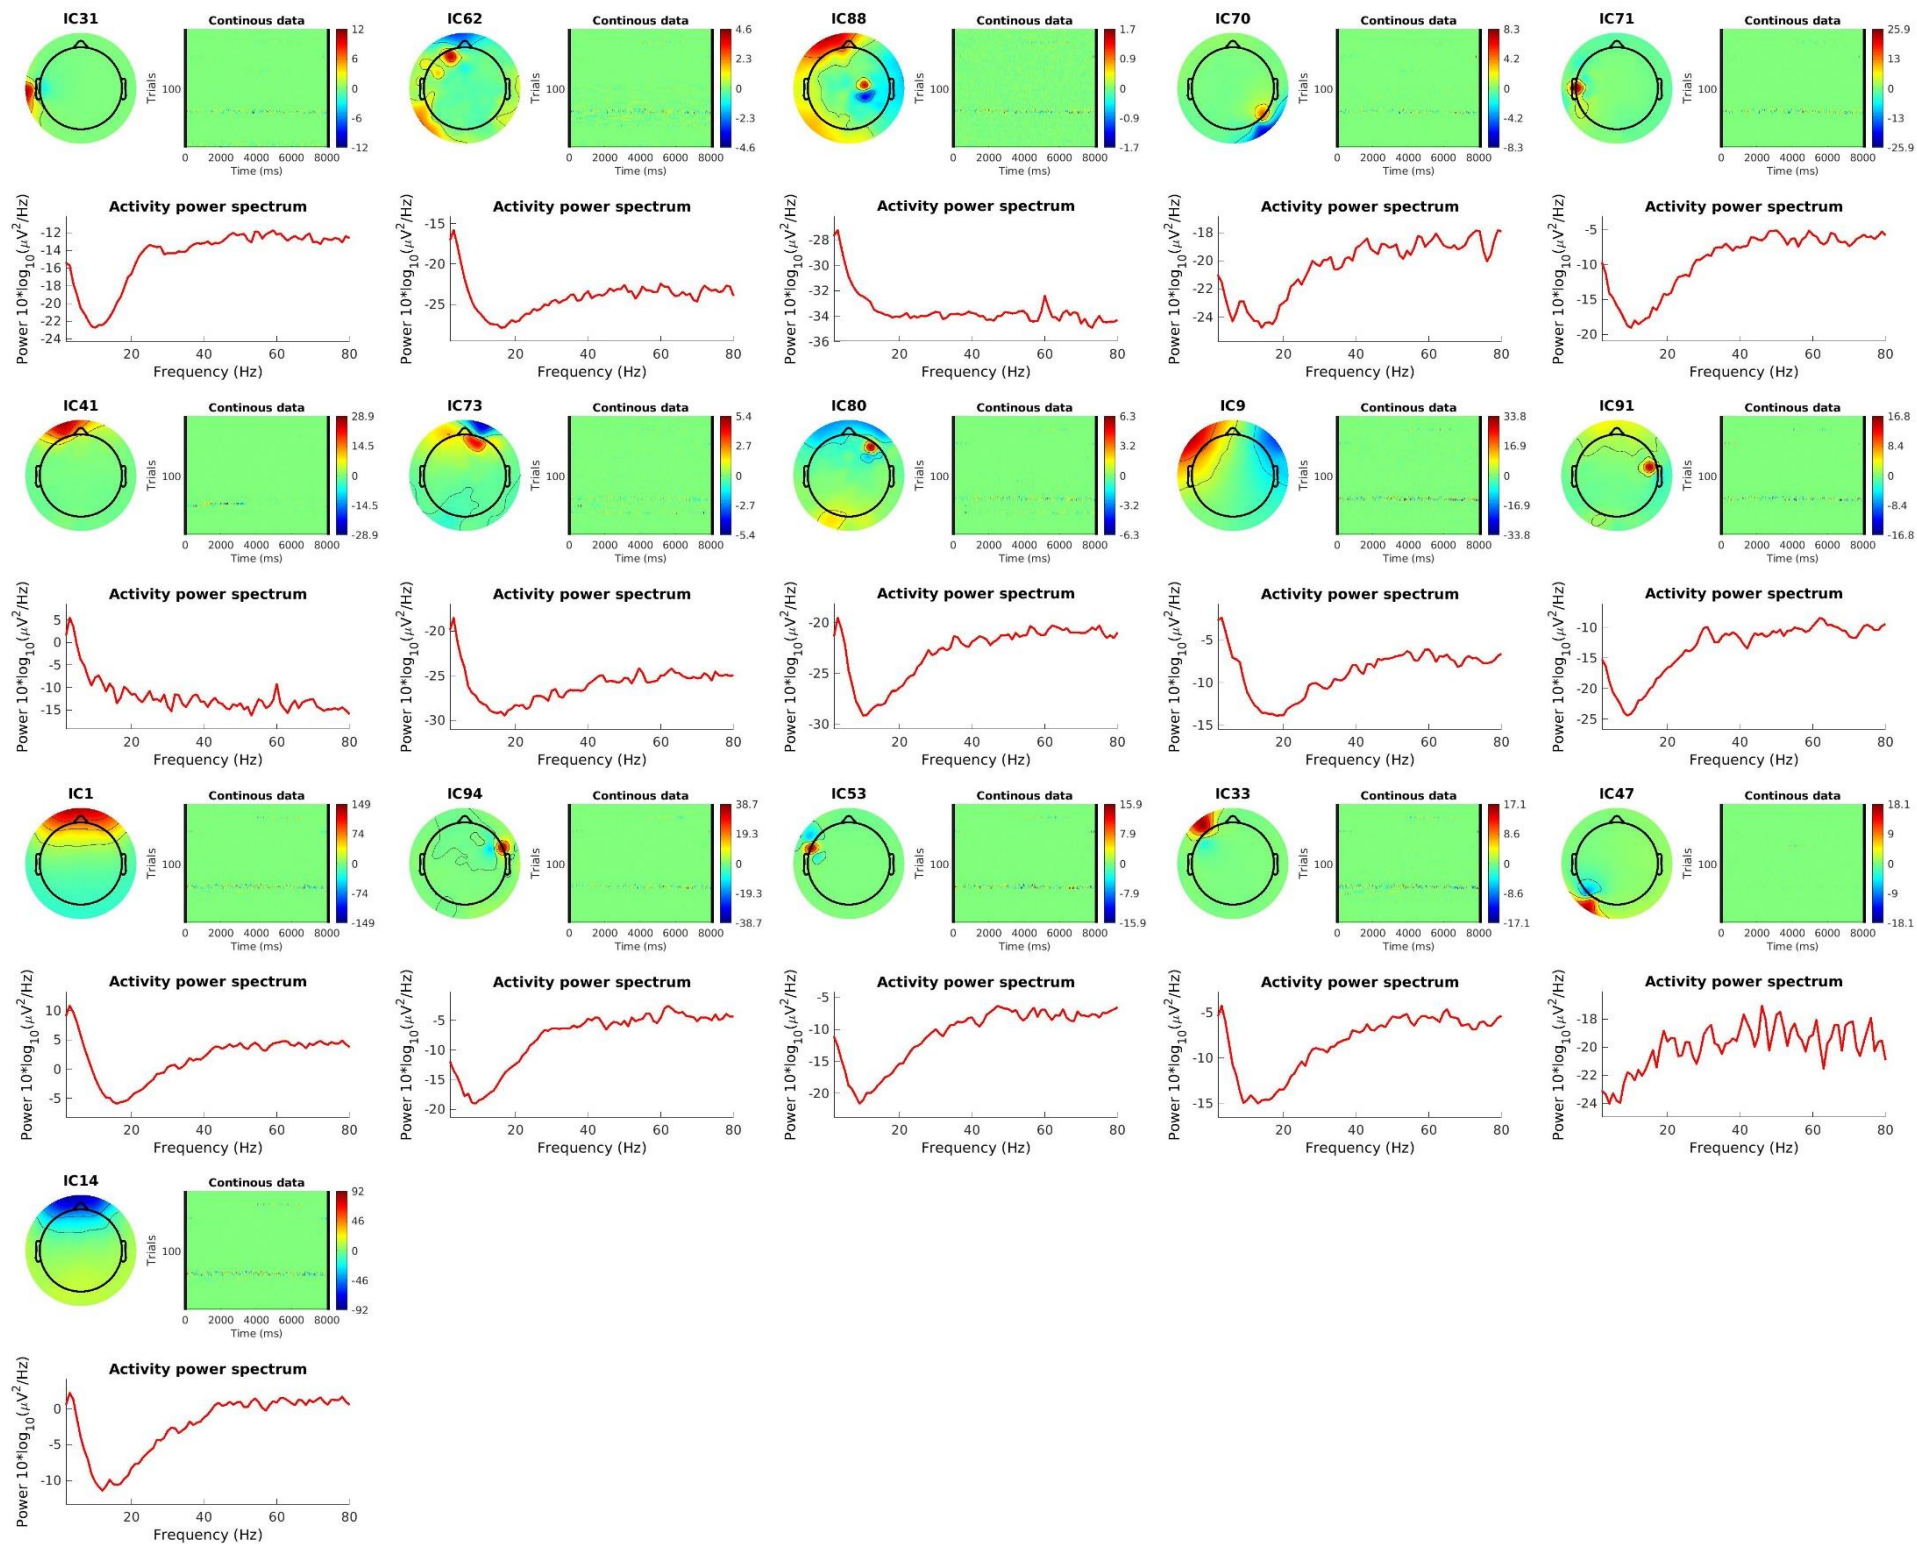

Supplement: s1 [file s1]
