# Supplementary material for: iCanClean Improves Independent Component Analysis of Mobile Brain Imaging with EEG
Source: Sensors (Basel). 2023 Jan 13;23(2):928. doi: 10.3390/s23020928 (PMC9863946; doi:10.3390/s23020928)
Supplement: Supplementary file 1 [file sensors-23-00928-s001.zip › Summary Data.xlsx]

## Sheet: Sheet1
Subject	WindowLength	NoiseChannels	rSqCutoff	NumGoodComponents
'YA1'	'1 Sec'	120	0.65	17
'YA1'	'1 Sec'	120	0.95	24
'YA1'	'1 Sec'	120	0.7	17
'YA1'	'1 Sec'	120	0.2	16
'YA1'	'1 Sec'	120	0.1	14
'YA1'	'1 Sec'	120	0.3	19
'YA1'	'1 Sec'	120	0.55	18
'YA1'	'1 Sec'	120	0.6	18
'YA1'	'1 Sec'	120	0.4	17
'YA1'	'1 Sec'	120	0.15	14
'YA1'	'1 Sec'	120	0.35	16
'YA1'	'1 Sec'	120	0.45	16
'YA1'	'1 Sec'	120	0.25	18
'YA1'	'1 Sec'	120	0.05	11
'YA1'	'1 Sec'	120	0.5	17
'YA1'	'1 Sec'	120	1	22
'YA1'	'1 Sec'	120	0.85	18
'YA1'	'1 Sec'	120	0.8	15
'YA1'	'1 Sec'	120	0.75	15
'YA1'	'1 Sec'	120	0.9	20
'YA2'	'1 Sec'	120	0.35	11
'YA2'	'1 Sec'	120	0.95	14
'YA2'	'1 Sec'	120	0.1	9
'YA2'	'1 Sec'	120	0.65	11
'YA2'	'1 Sec'	120	0.4	11
'YA2'	'1 Sec'	120	0.55	13
'YA2'	'1 Sec'	120	0.2	8
'YA2'	'1 Sec'	120	0.7	12
'YA2'	'1 Sec'	120	0.45	12
'YA2'	'1 Sec'	120	0.6	13
'YA2'	'1 Sec'	120	0.3	8
'YA2'	'1 Sec'	120	0.15	9
'YA2'	'1 Sec'	120	1	13
'YA2'	'1 Sec'	120	0.75	14
'YA2'	'1 Sec'	120	0.85	13
'YA2'	'1 Sec'	120	0.05	9
'YA2'	'1 Sec'	120	0.9	12
'YA2'	'1 Sec'	120	0.5	13
'YA2'	'1 Sec'	120	0.8	13
'YA2'	'1 Sec'	120	0.25	8
'YA3'	'1 Sec'	120	0.35	10
'YA3'	'1 Sec'	120	0.55	12
'YA3'	'1 Sec'	120	0.4	11
'YA3'	'1 Sec'	120	0.65	13
'YA3'	'1 Sec'	120	0.6	11
'YA3'	'1 Sec'	120	0.7	12
'YA3'	'1 Sec'	120	0.45	11
'YA3'	'1 Sec'	120	0.2	9
'YA3'	'1 Sec'	120	0.1	8
'YA3'	'1 Sec'	120	0.15	8
'YA3'	'1 Sec'	120	0.95	15
'YA3'	'1 Sec'	120	0.3	10
'YA3'	'1 Sec'	120	0.5	13
'YA3'	'1 Sec'	120	0.8	13
'YA3'	'1 Sec'	120	0.25	12
'YA3'	'1 Sec'	120	0.75	12
'YA3'	'1 Sec'	120	1	12
'YA3'	'1 Sec'	120	0.85	16
'YA3'	'1 Sec'	120	0.9	14
'YA3'	'1 Sec'	120	0.05	6
'YA4'	'1 Sec'	120	0.4	7
'YA4'	'1 Sec'	120	0.35	7
'YA4'	'1 Sec'	120	0.3	7
'YA4'	'1 Sec'	120	0.95	9
'YA4'	'1 Sec'	120	0.45	7
'YA4'	'1 Sec'	120	0.1	5
'YA4'	'1 Sec'	120	0.15	6
'YA4'	'1 Sec'	120	0.55	8
'YA4'	'1 Sec'	120	0.7	8
'YA4'	'1 Sec'	120	0.2	6
'YA4'	'1 Sec'	120	0.6	8
'YA4'	'1 Sec'	120	0.65	8
'YA4'	'1 Sec'	120	0.85	9
'YA4'	'1 Sec'	120	0.9	8
'YA4'	'1 Sec'	120	1	10
'YA4'	'1 Sec'	120	0.75	8
'YA4'	'1 Sec'	120	0.5	8
'YA4'	'1 Sec'	120	0.25	7
'YA4'	'1 Sec'	120	0.05	2
'YA4'	'1 Sec'	120	0.8	8
'YA5'	'1 Sec'	120	0.55	9
'YA5'	'1 Sec'	120	0.95	8
'YA5'	'1 Sec'	120	0.6	10
'YA5'	'1 Sec'	120	0.15	6
'YA5'	'1 Sec'	120	0.3	9
'YA5'	'1 Sec'	120	0.4	9
'YA5'	'1 Sec'	120	0.1	6
'YA5'	'1 Sec'	120	0.2	7
'YA5'	'1 Sec'	120	0.35	9
'YA5'	'1 Sec'	120	0.45	10
'YA5'	'1 Sec'	120	0.7	8
'YA5'	'1 Sec'	120	0.65	7
'YA5'	'1 Sec'	120	0.9	9
'YA5'	'1 Sec'	120	0.85	9
'YA5'	'1 Sec'	120	0.5	10
'YA5'	'1 Sec'	120	1	7
'YA5'	'1 Sec'	120	0.75	7
'YA5'	'1 Sec'	120	0.05	6
'YA5'	'1 Sec'	120	0.25	9
'YA5'	'1 Sec'	120	0.8	9
'YA6'	'1 Sec'	120	0.6	8
'YA6'	'1 Sec'	120	0.95	10
'YA6'	'1 Sec'	120	0.55	7
'YA6'	'1 Sec'	120	0.65	10
'YA6'	'1 Sec'	120	0.7	10
'YA6'	'1 Sec'	120	0.45	6
'YA6'	'1 Sec'	120	0.15	5
'YA6'	'1 Sec'	120	0.2	5
'YA6'	'1 Sec'	120	0.3	5
'YA6'	'1 Sec'	120	0.1	5
'YA6'	'1 Sec'	120	0.35	5
'YA6'	'1 Sec'	120	0.4	5
'YA6'	'1 Sec'	120	1	9
'YA6'	'1 Sec'	120	0.5	6
'YA6'	'1 Sec'	120	0.85	10
'YA6'	'1 Sec'	120	0.75	12
'YA6'	'1 Sec'	120	0.8	14
'YA6'	'1 Sec'	120	0.05	6
'YA6'	'1 Sec'	120	0.9	9
'YA6'	'1 Sec'	120	0.25	5
'YA7'	'1 Sec'	120	0.65	8
'YA7'	'1 Sec'	120	0.95	14
'YA7'	'1 Sec'	120	0.6	8
'YA7'	'1 Sec'	120	0.7	7
'YA7'	'1 Sec'	120	0.4	5
'YA7'	'1 Sec'	120	0.3	6
'YA7'	'1 Sec'	120	0.15	4
'YA7'	'1 Sec'	120	0.55	4
'YA7'	'1 Sec'	120	0.35	5
'YA7'	'1 Sec'	120	0.45	5
'YA7'	'1 Sec'	120	0.2	6
'YA7'	'1 Sec'	120	0.1	6
'YA7'	'1 Sec'	120	1	10
'YA7'	'1 Sec'	120	0.5	6
'YA7'	'1 Sec'	120	0.85	9
'YA7'	'1 Sec'	120	0.75	7
'YA7'	'1 Sec'	120	0.05	5
'YA7'	'1 Sec'	120	0.8	8
'YA7'	'1 Sec'	120	0.25	9
'YA7'	'1 Sec'	120	0.9	8
'YA8'	'1 Sec'	120	0.35	0
'YA8'	'1 Sec'	120	0.45	0
'YA8'	'1 Sec'	120	0.15	1
'YA8'	'1 Sec'	120	0.6	0
'YA8'	'1 Sec'	120	0.2	1
'YA8'	'1 Sec'	120	0.65	1
'YA8'	'1 Sec'	120	0.1	1
'YA8'	'1 Sec'	120	0.55	0
'YA8'	'1 Sec'	120	0.3	0
'YA8'	'1 Sec'	120	0.95	9
'YA8'	'1 Sec'	120	0.7	1
'YA8'	'1 Sec'	120	0.4	0
'YA8'	'1 Sec'	120	1	9
'YA8'	'1 Sec'	120	0.5	0
'YA8'	'1 Sec'	120	0.85	4
'YA8'	'1 Sec'	120	0.75	2
'YA8'	'1 Sec'	120	0.25	0
'YA8'	'1 Sec'	120	0.05	2
'YA8'	'1 Sec'	120	0.9	8
'YA8'	'1 Sec'	120	0.8	5
'YA9'	'1 Sec'	120	0.7	13
'YA9'	'1 Sec'	120	0.4	12
'YA9'	'1 Sec'	120	0.2	9
'YA9'	'1 Sec'	120	0.95	11
'YA9'	'1 Sec'	120	0.1	8
'YA9'	'1 Sec'	120	0.3	8
'YA9'	'1 Sec'	120	0.65	12
'YA9'	'1 Sec'	120	0.45	11
'YA9'	'1 Sec'	120	0.15	7
'YA9'	'1 Sec'	120	0.35	10
'YA9'	'1 Sec'	120	0.55	12
'YA9'	'1 Sec'	120	0.6	12
'YA9'	'1 Sec'	120	0.05	8
'YA9'	'1 Sec'	120	0.25	9
'YA9'	'1 Sec'	120	0.5	12
'YA9'	'1 Sec'	120	0.75	14
'YA9'	'1 Sec'	120	1	12
'YA9'	'1 Sec'	120	0.9	11
'YA9'	'1 Sec'	120	0.8	12
'YA9'	'1 Sec'	120	0.85	12
'YA10'	'1 Sec'	120	0.45	6
'YA10'	'1 Sec'	120	0.65	8
'YA10'	'1 Sec'	120	0.3	6
'YA10'	'1 Sec'	120	0.2	5
'YA10'	'1 Sec'	120	0.95	10
'YA10'	'1 Sec'	120	0.7	8
'YA10'	'1 Sec'	120	0.55	6
'YA10'	'1 Sec'	120	0.35	6
'YA10'	'1 Sec'	120	0.6	8
'YA10'	'1 Sec'	120	0.4	8
'YA10'	'1 Sec'	120	0.1	4
'YA10'	'1 Sec'	120	0.15	4
'YA10'	'1 Sec'	120	0.05	4
'YA10'	'1 Sec'	120	0.85	8
'YA10'	'1 Sec'	120	0.25	6
'YA10'	'1 Sec'	120	0.75	8
'YA10'	'1 Sec'	120	1	8
'YA10'	'1 Sec'	120	0.5	6
'YA10'	'1 Sec'	120	0.9	9
'YA10'	'1 Sec'	120	0.8	8
'YA11'	'1 Sec'	120	0.15	4
'YA11'	'1 Sec'	120	0.2	3
'YA11'	'1 Sec'	120	0.45	3
'YA11'	'1 Sec'	120	0.7	4
'YA11'	'1 Sec'	120	0.6	3
'YA11'	'1 Sec'	120	0.35	2
'YA11'	'1 Sec'	120	0.1	3
'YA11'	'1 Sec'	120	0.3	2
'YA11'	'1 Sec'	120	0.65	4
'YA11'	'1 Sec'	120	0.4	2
'YA11'	'1 Sec'	120	0.55	3
'YA11'	'1 Sec'	120	0.95	5
'YA11'	'1 Sec'	120	0.05	2
'YA11'	'1 Sec'	120	0.85	6
'YA11'	'1 Sec'	120	0.75	6
'YA11'	'1 Sec'	120	0.25	3
'YA11'	'1 Sec'	120	1	6
'YA11'	'1 Sec'	120	0.5	3
'YA11'	'1 Sec'	120	0.8	5
'YA11'	'1 Sec'	120	0.9	5
'YA12'	'1 Sec'	120	0.65	11
'YA12'	'1 Sec'	120	0.55	12
'YA12'	'1 Sec'	120	0.95	11
'YA12'	'1 Sec'	120	0.45	11
'YA12'	'1 Sec'	120	0.7	10
'YA12'	'1 Sec'	120	0.6	12
'YA12'	'1 Sec'	120	0.15	10
'YA12'	'1 Sec'	120	0.2	10
'YA12'	'1 Sec'	120	0.1	7
'YA12'	'1 Sec'	120	0.35	10
'YA12'	'1 Sec'	120	0.4	10
'YA12'	'1 Sec'	120	0.3	10
'YA12'	'1 Sec'	120	0.85	12
'YA12'	'1 Sec'	120	0.75	11
'YA12'	'1 Sec'	120	0.8	13
'YA12'	'1 Sec'	120	1	10
'YA12'	'1 Sec'	120	0.9	12
'YA12'	'1 Sec'	120	0.05	3
'YA12'	'1 Sec'	120	0.25	10
'YA12'	'1 Sec'	120	0.5	12
'YA13'	'1 Sec'	120	0.95	9
'YA13'	'1 Sec'	120	0.6	5
'YA13'	'1 Sec'	120	0.35	4
'YA13'	'1 Sec'	120	0.4	4
'YA13'	'1 Sec'	120	0.55	4
'YA13'	'1 Sec'	120	0.7	4
'YA13'	'1 Sec'	120	0.3	4
'YA13'	'1 Sec'	120	0.65	5
'YA13'	'1 Sec'	120	0.45	4
'YA13'	'1 Sec'	120	0.2	4
'YA13'	'1 Sec'	120	0.15	5
'YA13'	'1 Sec'	120	0.1	5
'YA13'	'1 Sec'	120	0.25	4
'YA13'	'1 Sec'	120	0.5	4
'YA13'	'1 Sec'	120	0.75	5
'YA13'	'1 Sec'	120	0.8	4
'YA13'	'1 Sec'	120	0.85	6
'YA13'	'1 Sec'	120	0.9	7
'YA13'	'1 Sec'	120	1	7
'YA13'	'1 Sec'	120	0.05	2
'YA14'	'1 Sec'	120	0.3	14
'YA14'	'1 Sec'	120	0.6	18
'YA14'	'1 Sec'	120	0.15	13
'YA14'	'1 Sec'	120	0.7	19
'YA14'	'1 Sec'	120	0.4	16
'YA14'	'1 Sec'	120	0.95	25
'YA14'	'1 Sec'	120	0.35	14
'YA14'	'1 Sec'	120	0.2	12
'YA14'	'1 Sec'	120	0.55	18
'YA14'	'1 Sec'	120	0.45	19
'YA14'	'1 Sec'	120	0.1	10
'YA14'	'1 Sec'	120	0.65	18
'YA14'	'1 Sec'	120	0.9	25
'YA14'	'1 Sec'	120	1	21
'YA14'	'1 Sec'	120	0.05	10
'YA14'	'1 Sec'	120	0.25	12
'YA14'	'1 Sec'	120	0.5	16
'YA14'	'1 Sec'	120	0.75	18
'YA14'	'1 Sec'	120	0.8	19
'YA14'	'1 Sec'	120	0.85	23
'YA15'	'1 Sec'	120	0.45	14
'YA15'	'1 Sec'	120	0.6	15
'YA15'	'1 Sec'	120	0.65	16
'YA15'	'1 Sec'	120	0.2	12
'YA15'	'1 Sec'	120	0.35	14
'YA15'	'1 Sec'	120	0.1	12
'YA15'	'1 Sec'	120	0.95	15
'YA15'	'1 Sec'	120	0.55	14
'YA15'	'1 Sec'	120	0.7	16
'YA15'	'1 Sec'	120	0.3	13
'YA15'	'1 Sec'	120	0.4	14
'YA15'	'1 Sec'	120	0.15	12
'YA15'	'1 Sec'	120	0.5	14
'YA15'	'1 Sec'	120	0.75	16
'YA15'	'1 Sec'	120	0.8	14
'YA15'	'1 Sec'	120	0.85	16
'YA15'	'1 Sec'	120	0.9	15
'YA15'	'1 Sec'	120	1	14
'YA15'	'1 Sec'	120	0.05	11
'YA15'	'1 Sec'	120	0.25	12
'HFOA1'	'1 Sec'	120	0.3	7
'HFOA1'	'1 Sec'	120	0.4	7
'HFOA1'	'1 Sec'	120	0.55	6
'HFOA1'	'1 Sec'	120	0.65	7
'HFOA1'	'1 Sec'	120	0.15	8
'HFOA1'	'1 Sec'	120	0.95	10
'HFOA1'	'1 Sec'	120	0.35	7
'HFOA1'	'1 Sec'	120	0.45	6
'HFOA1'	'1 Sec'	120	0.6	5
'HFOA1'	'1 Sec'	120	0.7	7
'HFOA1'	'1 Sec'	120	0.2	7
'HFOA1'	'1 Sec'	120	0.1	6
'HFOA1'	'1 Sec'	120	0.05	4
'HFOA1'	'1 Sec'	120	0.25	6
'HFOA1'	'1 Sec'	120	0.5	7
'HFOA1'	'1 Sec'	120	0.75	8
'HFOA1'	'1 Sec'	120	0.8	8
'HFOA1'	'1 Sec'	120	0.85	8
'HFOA1'	'1 Sec'	120	0.9	11
'HFOA1'	'1 Sec'	120	1	5
'HFOA2'	'1 Sec'	120	0.6	4
'HFOA2'	'1 Sec'	120	0.65	6
'HFOA2'	'1 Sec'	120	0.95	6
'HFOA2'	'1 Sec'	120	0.2	2
'HFOA2'	'1 Sec'	120	0.35	5
'HFOA2'	'1 Sec'	120	0.1	4
'HFOA2'	'1 Sec'	120	0.55	4
'HFOA2'	'1 Sec'	120	0.45	5
'HFOA2'	'1 Sec'	120	0.4	6
'HFOA2'	'1 Sec'	120	0.3	3
'HFOA2'	'1 Sec'	120	0.7	5
'HFOA2'	'1 Sec'	120	0.15	3
'HFOA2'	'1 Sec'	120	0.9	4
'HFOA2'	'1 Sec'	120	1	3
'HFOA2'	'1 Sec'	120	0.05	4
'HFOA2'	'1 Sec'	120	0.25	5
'HFOA2'	'1 Sec'	120	0.5	4
'HFOA2'	'1 Sec'	120	0.75	5
'HFOA2'	'1 Sec'	120	0.8	4
'HFOA2'	'1 Sec'	120	0.85	3
'HFOA3'	'1 Sec'	120	0.35	10
'HFOA3'	'1 Sec'	120	0.4	9
'HFOA3'	'1 Sec'	120	0.95	12
'HFOA3'	'1 Sec'	120	0.55	9
'HFOA3'	'1 Sec'	120	0.7	7
'HFOA3'	'1 Sec'	120	0.1	5
'HFOA3'	'1 Sec'	120	0.65	8
'HFOA3'	'1 Sec'	120	0.2	8
'HFOA3'	'1 Sec'	120	0.45	11
'HFOA3'	'1 Sec'	120	0.6	9
'HFOA3'	'1 Sec'	120	0.15	7
'HFOA3'	'1 Sec'	120	0.3	10
'HFOA3'	'1 Sec'	120	0.25	8
'HFOA3'	'1 Sec'	120	0.5	9
'HFOA3'	'1 Sec'	120	0.75	8
'HFOA3'	'1 Sec'	120	0.8	6
'HFOA3'	'1 Sec'	120	0.85	6
'HFOA3'	'1 Sec'	120	0.9	9
'HFOA3'	'1 Sec'	120	1	4
'HFOA3'	'1 Sec'	120	0.05	4
'HFOA4'	'1 Sec'	120	0.7	2
'HFOA4'	'1 Sec'	120	0.6	2
'HFOA4'	'1 Sec'	120	0.4	0
'HFOA4'	'1 Sec'	120	0.3	0
'HFOA4'	'1 Sec'	120	0.15	0
'HFOA4'	'1 Sec'	120	0.55	1
'HFOA4'	'1 Sec'	120	0.95	6
'HFOA4'	'1 Sec'	120	0.65	2
'HFOA4'	'1 Sec'	120	0.1	0
'HFOA4'	'1 Sec'	120	0.45	0
'HFOA4'	'1 Sec'	120	0.35	1
'HFOA4'	'1 Sec'	120	0.2	0
'HFOA4'	'1 Sec'	120	0.05	0
'HFOA4'	'1 Sec'	120	0.5	1
'HFOA4'	'1 Sec'	120	0.75	2
'HFOA4'	'1 Sec'	120	0.85	2
'HFOA4'	'1 Sec'	120	0.9	5
'HFOA4'	'1 Sec'	120	1	3
'HFOA4'	'1 Sec'	120	0.8	2
'HFOA4'	'1 Sec'	120	0.25	0
'HFOA5'	'1 Sec'	120	0.45	6
'HFOA5'	'1 Sec'	120	0.15	3
'HFOA5'	'1 Sec'	120	0.3	3
'HFOA5'	'1 Sec'	120	0.2	3
'HFOA5'	'1 Sec'	120	0.55	6
'HFOA5'	'1 Sec'	120	0.4	7
'HFOA5'	'1 Sec'	120	0.6	7
'HFOA5'	'1 Sec'	120	0.1	3
'HFOA5'	'1 Sec'	120	0.35	4
'HFOA5'	'1 Sec'	120	0.95	8
'HFOA5'	'1 Sec'	120	0.65	8
'HFOA5'	'1 Sec'	120	0.7	9
'HFOA5'	'1 Sec'	120	0.85	9
'HFOA5'	'1 Sec'	120	0.9	9
'HFOA5'	'1 Sec'	120	1	6
'HFOA5'	'1 Sec'	120	0.05	3
'HFOA5'	'1 Sec'	120	0.25	3
'HFOA5'	'1 Sec'	120	0.5	7
'HFOA5'	'1 Sec'	120	0.75	8
'HFOA5'	'1 Sec'	120	0.8	9
'HFOA6'	'1 Sec'	120	0.55	8
'HFOA6'	'1 Sec'	120	0.6	8
'HFOA6'	'1 Sec'	120	0.2	7
'HFOA6'	'1 Sec'	120	0.1	5
'HFOA6'	'1 Sec'	120	0.35	5
'HFOA6'	'1 Sec'	120	0.7	7
'HFOA6'	'1 Sec'	120	0.4	5
'HFOA6'	'1 Sec'	120	0.3	6
'HFOA6'	'1 Sec'	120	0.95	8
'HFOA6'	'1 Sec'	120	0.45	5
'HFOA6'	'1 Sec'	120	0.65	8
'HFOA6'	'1 Sec'	120	0.15	5
'HFOA6'	'1 Sec'	120	0.05	2
'HFOA6'	'1 Sec'	120	0.25	6
'HFOA6'	'1 Sec'	120	0.5	7
'HFOA6'	'1 Sec'	120	0.75	8
'HFOA6'	'1 Sec'	120	0.8	8
'HFOA6'	'1 Sec'	120	0.85	9
'HFOA6'	'1 Sec'	120	0.9	9
'HFOA6'	'1 Sec'	120	1	10
'HFOA7'	'1 Sec'	120	0.6	3
'HFOA7'	'1 Sec'	120	0.55	3
'HFOA7'	'1 Sec'	120	0.7	4
'HFOA7'	'1 Sec'	120	0.95	8
'HFOA7'	'1 Sec'	120	0.4	3
'HFOA7'	'1 Sec'	120	0.45	3
'HFOA7'	'1 Sec'	120	0.65	3
'HFOA7'	'1 Sec'	120	0.1	3
'HFOA7'	'1 Sec'	120	0.3	3
'HFOA7'	'1 Sec'	120	0.15	2
'HFOA7'	'1 Sec'	120	0.35	1
'HFOA7'	'1 Sec'	120	0.2	1
'HFOA7'	'1 Sec'	120	1	6
'HFOA7'	'1 Sec'	120	0.05	1
'HFOA7'	'1 Sec'	120	0.25	2
'HFOA7'	'1 Sec'	120	0.5	4
'HFOA7'	'1 Sec'	120	0.75	4
'HFOA7'	'1 Sec'	120	0.8	4
'HFOA7'	'1 Sec'	120	0.85	4
'HFOA7'	'1 Sec'	120	0.9	6
'HFOA8'	'1 Sec'	120	0.35	2
'HFOA8'	'1 Sec'	120	0.15	2
'HFOA8'	'1 Sec'	120	0.45	2
'HFOA8'	'1 Sec'	120	0.65	4
'HFOA8'	'1 Sec'	120	0.55	3
'HFOA8'	'1 Sec'	120	0.2	2
'HFOA8'	'1 Sec'	120	0.7	4
'HFOA8'	'1 Sec'	120	0.4	2
'HFOA8'	'1 Sec'	120	0.6	3
'HFOA8'	'1 Sec'	120	0.3	2
'HFOA8'	'1 Sec'	120	0.95	4
'HFOA8'	'1 Sec'	120	0.1	2
'HFOA8'	'1 Sec'	120	0.8	4
'HFOA8'	'1 Sec'	120	0.85	5
'HFOA8'	'1 Sec'	120	0.9	6
'HFOA8'	'1 Sec'	120	1	9
'HFOA8'	'1 Sec'	120	0.05	2
'HFOA8'	'1 Sec'	120	0.25	1
'HFOA8'	'1 Sec'	120	0.5	2
'HFOA8'	'1 Sec'	120	0.75	4
'HFOA9'	'1 Sec'	120	0.55	2
'HFOA9'	'1 Sec'	120	0.4	3
'HFOA9'	'1 Sec'	120	0.2	1
'HFOA9'	'1 Sec'	120	0.7	3
'HFOA9'	'1 Sec'	120	0.6	3
'HFOA9'	'1 Sec'	120	0.45	2
'HFOA9'	'1 Sec'	120	0.3	2
'HFOA9'	'1 Sec'	120	0.1	1
'HFOA9'	'1 Sec'	120	0.95	9
'HFOA9'	'1 Sec'	120	0.65	4
'HFOA9'	'1 Sec'	120	0.35	1
'HFOA9'	'1 Sec'	120	0.15	1
'HFOA9'	'1 Sec'	120	0.05	1
'HFOA9'	'1 Sec'	120	0.25	1
'HFOA9'	'1 Sec'	120	0.5	2
'HFOA9'	'1 Sec'	120	0.75	3
'HFOA9'	'1 Sec'	120	0.8	3
'HFOA9'	'1 Sec'	120	0.85	4
'HFOA9'	'1 Sec'	120	0.9	4
'HFOA9'	'1 Sec'	120	1	2
'HFOA10'	'1 Sec'	120	0.45	11
'HFOA10'	'1 Sec'	120	0.3	12
'HFOA10'	'1 Sec'	120	0.95	18
'HFOA10'	'1 Sec'	120	0.1	13
'HFOA10'	'1 Sec'	120	0.55	12
'HFOA10'	'1 Sec'	120	0.65	15
'HFOA10'	'1 Sec'	120	0.35	11
'HFOA10'	'1 Sec'	120	0.15	11
'HFOA10'	'1 Sec'	120	0.6	13
'HFOA10'	'1 Sec'	120	0.7	15
'HFOA10'	'1 Sec'	120	0.4	12
'HFOA10'	'1 Sec'	120	0.2	10
'HFOA10'	'1 Sec'	120	1	16
'HFOA10'	'1 Sec'	120	0.05	7
'HFOA10'	'1 Sec'	120	0.25	11
'HFOA10'	'1 Sec'	120	0.5	12
'HFOA10'	'1 Sec'	120	0.75	16
'HFOA10'	'1 Sec'	120	0.8	16
'HFOA10'	'1 Sec'	120	0.85	18
'HFOA10'	'1 Sec'	120	0.9	17
'HFOA11'	'1 Sec'	120	0.55	11
'HFOA11'	'1 Sec'	120	0.7	8
'HFOA11'	'1 Sec'	120	0.15	8
'HFOA11'	'1 Sec'	120	0.35	6
'HFOA11'	'1 Sec'	120	0.65	11
'HFOA11'	'1 Sec'	120	0.4	9
'HFOA11'	'1 Sec'	120	0.2	8
'HFOA11'	'1 Sec'	120	0.1	6
'HFOA11'	'1 Sec'	120	0.95	14
'HFOA11'	'1 Sec'	120	0.45	9
'HFOA11'	'1 Sec'	120	0.3	8
'HFOA11'	'1 Sec'	120	0.6	13
'HFOA11'	'1 Sec'	120	0.5	10
'HFOA11'	'1 Sec'	120	0.75	9
'HFOA11'	'1 Sec'	120	0.8	13
'HFOA11'	'1 Sec'	120	0.85	9
'HFOA11'	'1 Sec'	120	0.9	9
'HFOA11'	'1 Sec'	120	1	8
'HFOA11'	'1 Sec'	120	0.05	6
'HFOA11'	'1 Sec'	120	0.25	8
'HFOA12'	'1 Sec'	120	0.4	5
'HFOA12'	'1 Sec'	120	0.6	7
'HFOA12'	'1 Sec'	120	0.95	10
'HFOA12'	'1 Sec'	120	0.1	4
'HFOA12'	'1 Sec'	120	0.45	5
'HFOA12'	'1 Sec'	120	0.65	6
'HFOA12'	'1 Sec'	120	0.3	5
'HFOA12'	'1 Sec'	120	0.15	4
'HFOA12'	'1 Sec'	120	0.55	7
'HFOA12'	'1 Sec'	120	0.7	6
'HFOA12'	'1 Sec'	120	0.35	5
'HFOA12'	'1 Sec'	120	0.2	4
'HFOA12'	'1 Sec'	120	0.05	4
'HFOA12'	'1 Sec'	120	0.25	4
'HFOA12'	'1 Sec'	120	0.5	5
'HFOA12'	'1 Sec'	120	0.75	7
'HFOA12'	'1 Sec'	120	0.8	6
'HFOA12'	'1 Sec'	120	0.85	8
'HFOA12'	'1 Sec'	120	0.9	8
'HFOA12'	'1 Sec'	120	1	6
'HFOA13'	'1 Sec'	120	0.65	2
'HFOA13'	'1 Sec'	120	0.45	2
'HFOA13'	'1 Sec'	120	0.2	0
'HFOA13'	'1 Sec'	120	0.1	0
'HFOA13'	'1 Sec'	120	0.7	3
'HFOA13'	'1 Sec'	120	0.55	2
'HFOA13'	'1 Sec'	120	0.3	1
'HFOA13'	'1 Sec'	120	0.4	1
'HFOA13'	'1 Sec'	120	0.15	0
'HFOA13'	'1 Sec'	120	0.95	5
'HFOA13'	'1 Sec'	120	0.6	2
'HFOA13'	'1 Sec'	120	0.35	2
'HFOA13'	'1 Sec'	120	1	2
'HFOA13'	'1 Sec'	120	0.05	0
'HFOA13'	'1 Sec'	120	0.25	1
'HFOA13'	'1 Sec'	120	0.5	2
'HFOA13'	'1 Sec'	120	0.75	4
'HFOA13'	'1 Sec'	120	0.8	4
'HFOA13'	'1 Sec'	120	0.85	5
'HFOA13'	'1 Sec'	120	0.9	4
'HFOA14'	'1 Sec'	120	0.95	12
'HFOA14'	'1 Sec'	120	0.6	10
'HFOA14'	'1 Sec'	120	0.3	7
'HFOA14'	'1 Sec'	120	0.45	7
'HFOA14'	'1 Sec'	120	0.65	10
'HFOA14'	'1 Sec'	120	0.35	7
'HFOA14'	'1 Sec'	120	0.7	11
'HFOA14'	'1 Sec'	120	0.4	8
'HFOA14'	'1 Sec'	120	0.55	9
'HFOA14'	'1 Sec'	120	0.15	7
'HFOA14'	'1 Sec'	120	0.2	7
'HFOA14'	'1 Sec'	120	0.1	7
'HFOA14'	'1 Sec'	120	0.5	7
'HFOA14'	'1 Sec'	120	0.75	13
'HFOA14'	'1 Sec'	120	0.8	11
'HFOA14'	'1 Sec'	120	0.85	10
'HFOA14'	'1 Sec'	120	0.9	12
'HFOA14'	'1 Sec'	120	1	10
'HFOA14'	'1 Sec'	120	0.25	7
'HFOA14'	'1 Sec'	120	0.05	6
'HFOA15'	'1 Sec'	120	0.6	2
'HFOA15'	'1 Sec'	120	0.65	3
'HFOA15'	'1 Sec'	120	0.1	4
'HFOA15'	'1 Sec'	120	0.2	1
'HFOA15'	'1 Sec'	120	0.45	1
'HFOA15'	'1 Sec'	120	0.35	1
'HFOA15'	'1 Sec'	120	0.95	5
'HFOA15'	'1 Sec'	120	0.7	2
'HFOA15'	'1 Sec'	120	0.3	1
'HFOA15'	'1 Sec'	120	0.15	3
'HFOA15'	'1 Sec'	120	0.55	2
'HFOA15'	'1 Sec'	120	0.4	1
'HFOA15'	'1 Sec'	120	0.05	5
'HFOA15'	'1 Sec'	120	0.25	1
'HFOA15'	'1 Sec'	120	0.75	2
'HFOA15'	'1 Sec'	120	0.8	5
'HFOA15'	'1 Sec'	120	0.85	6
'HFOA15'	'1 Sec'	120	0.9	6
'HFOA15'	'1 Sec'	120	1	14
'HFOA15'	'1 Sec'	120	0.5	1
'LFOA1'	'1 Sec'	120	0.65	4
'LFOA1'	'1 Sec'	120	0.55	3
'LFOA1'	'1 Sec'	120	0.45	3
'LFOA1'	'1 Sec'	120	0.7	4
'LFOA1'	'1 Sec'	120	0.6	4
'LFOA1'	'1 Sec'	120	0.95	3
'LFOA1'	'1 Sec'	120	0.2	2
'LFOA1'	'1 Sec'	120	0.4	3
'LFOA1'	'1 Sec'	120	0.3	3
'LFOA1'	'1 Sec'	120	0.35	3
'LFOA1'	'1 Sec'	120	0.15	2
'LFOA1'	'1 Sec'	120	0.1	2
'LFOA1'	'1 Sec'	120	0.9	3
'LFOA1'	'1 Sec'	120	1	4
'LFOA1'	'1 Sec'	120	0.05	3
'LFOA1'	'1 Sec'	120	0.25	3
'LFOA1'	'1 Sec'	120	0.5	3
'LFOA1'	'1 Sec'	120	0.8	3
'LFOA1'	'1 Sec'	120	0.85	3
'LFOA1'	'1 Sec'	120	0.75	4
'LFOA2'	'1 Sec'	120	0.65	5
'LFOA2'	'1 Sec'	120	0.7	4
'LFOA2'	'1 Sec'	120	0.6	5
'LFOA2'	'1 Sec'	120	0.45	6
'LFOA2'	'1 Sec'	120	0.2	4
'LFOA2'	'1 Sec'	120	0.4	4
'LFOA2'	'1 Sec'	120	0.15	5
'LFOA2'	'1 Sec'	120	0.3	5
'LFOA2'	'1 Sec'	120	0.1	5
'LFOA2'	'1 Sec'	120	0.55	5
'LFOA2'	'1 Sec'	120	0.95	8
'LFOA2'	'1 Sec'	120	0.35	4
'LFOA2'	'1 Sec'	120	0.05	0
'LFOA2'	'1 Sec'	120	0.25	4
'LFOA2'	'1 Sec'	120	1	3
'LFOA2'	'1 Sec'	120	0.5	7
'LFOA2'	'1 Sec'	120	0.75	12
'LFOA2'	'1 Sec'	120	0.8	12
'LFOA2'	'1 Sec'	120	0.85	17
'LFOA2'	'1 Sec'	120	0.9	22
'LFOA3'	'1 Sec'	120	0.6	0
'LFOA3'	'1 Sec'	120	0.65	0
'LFOA3'	'1 Sec'	120	0.1	0
'LFOA3'	'1 Sec'	120	0.95	2
'LFOA3'	'1 Sec'	120	0.7	0
'LFOA3'	'1 Sec'	120	0.45	0
'LFOA3'	'1 Sec'	120	0.4	0
'LFOA3'	'1 Sec'	120	0.2	0
'LFOA3'	'1 Sec'	120	0.15	0
'LFOA3'	'1 Sec'	120	0.35	0
'LFOA3'	'1 Sec'	120	0.3	0
'LFOA3'	'1 Sec'	120	0.55	0
'LFOA3'	'1 Sec'	120	0.25	0
'LFOA3'	'1 Sec'	120	0.5	0
'LFOA3'	'1 Sec'	120	1	4
'LFOA3'	'1 Sec'	120	0.75	0
'LFOA3'	'1 Sec'	120	0.8	0
'LFOA3'	'1 Sec'	120	0.85	0
'LFOA3'	'1 Sec'	120	0.9	2
'LFOA3'	'1 Sec'	120	0.05	0
'LFOA4'	'1 Sec'	120	0.3	10
'LFOA4'	'1 Sec'	120	0.15	6
'LFOA4'	'1 Sec'	120	0.35	10
'LFOA4'	'1 Sec'	120	0.95	14
'LFOA4'	'1 Sec'	120	0.55	11
'LFOA4'	'1 Sec'	120	0.65	13
'LFOA4'	'1 Sec'	120	0.7	13
'LFOA4'	'1 Sec'	120	0.4	10
'LFOA4'	'1 Sec'	120	0.2	8
'LFOA4'	'1 Sec'	120	0.45	11
'LFOA4'	'1 Sec'	120	0.1	6
'LFOA4'	'1 Sec'	120	0.6	12
'LFOA4'	'1 Sec'	120	0.75	15
'LFOA4'	'1 Sec'	120	0.8	15
'LFOA4'	'1 Sec'	120	0.85	13
'LFOA4'	'1 Sec'	120	0.9	17
'LFOA4'	'1 Sec'	120	0.05	6
'LFOA4'	'1 Sec'	120	1	11
'LFOA4'	'1 Sec'	120	0.25	9
'LFOA4'	'1 Sec'	120	0.5	12
'LFOA5'	'1 Sec'	120	0.6	2
'LFOA5'	'1 Sec'	120	0.15	2
'LFOA5'	'1 Sec'	120	0.65	2
'LFOA5'	'1 Sec'	120	0.1	1
'LFOA5'	'1 Sec'	120	0.95	3
'LFOA5'	'1 Sec'	120	0.7	3
'LFOA5'	'1 Sec'	120	0.45	2
'LFOA5'	'1 Sec'	120	0.2	2
'LFOA5'	'1 Sec'	120	0.35	2
'LFOA5'	'1 Sec'	120	0.3	2
'LFOA5'	'1 Sec'	120	0.4	2
'LFOA5'	'1 Sec'	120	0.55	2
'LFOA5'	'1 Sec'	120	0.85	1
'LFOA5'	'1 Sec'	120	0.9	1
'LFOA5'	'1 Sec'	120	1	3
'LFOA5'	'1 Sec'	120	0.05	1
'LFOA5'	'1 Sec'	120	0.25	2
'LFOA5'	'1 Sec'	120	0.5	2
'LFOA5'	'1 Sec'	120	0.75	3
'LFOA5'	'1 Sec'	120	0.8	3
'LFOA6'	'1 Sec'	120	0.95	7
'LFOA6'	'1 Sec'	120	0.7	4
'LFOA6'	'1 Sec'	120	0.65	3
'LFOA6'	'1 Sec'	120	0.55	4
'LFOA6'	'1 Sec'	120	0.6	4
'LFOA6'	'1 Sec'	120	0.35	5
'LFOA6'	'1 Sec'	120	0.4	5
'LFOA6'	'1 Sec'	120	0.3	5
'LFOA6'	'1 Sec'	120	0.45	4
'LFOA6'	'1 Sec'	120	0.1	4
'LFOA6'	'1 Sec'	120	0.15	4
'LFOA6'	'1 Sec'	120	0.2	4
'LFOA6'	'1 Sec'	120	0.9	7
'LFOA6'	'1 Sec'	120	0.05	2
'LFOA6'	'1 Sec'	120	0.25	4
'LFOA6'	'1 Sec'	120	1	5
'LFOA6'	'1 Sec'	120	0.5	4
'LFOA6'	'1 Sec'	120	0.75	6
'LFOA6'	'1 Sec'	120	0.8	7
'LFOA6'	'1 Sec'	120	0.85	8
'LFOA7'	'1 Sec'	120	0.65	7
'LFOA7'	'1 Sec'	120	0.4	6
'LFOA7'	'1 Sec'	120	0.55	5
'LFOA7'	'1 Sec'	120	0.1	4
'LFOA7'	'1 Sec'	120	0.15	4
'LFOA7'	'1 Sec'	120	0.3	5
'LFOA7'	'1 Sec'	120	0.7	8
'LFOA7'	'1 Sec'	120	0.95	17
'LFOA7'	'1 Sec'	120	0.45	5
'LFOA7'	'1 Sec'	120	0.6	8
'LFOA7'	'1 Sec'	120	0.2	5
'LFOA7'	'1 Sec'	120	0.35	5
'LFOA7'	'1 Sec'	120	0.05	4
'LFOA7'	'1 Sec'	120	0.25	4
'LFOA7'	'1 Sec'	120	0.5	5
'LFOA7'	'1 Sec'	120	0.75	10
'LFOA7'	'1 Sec'	120	1	9
'LFOA7'	'1 Sec'	120	0.8	11
'LFOA7'	'1 Sec'	120	0.85	14
'LFOA7'	'1 Sec'	120	0.9	16
'LFOA8'	'1 Sec'	120	0.45	2
'LFOA8'	'1 Sec'	120	0.6	2
'LFOA8'	'1 Sec'	120	0.15	1
'LFOA8'	'1 Sec'	120	0.35	1
'LFOA8'	'1 Sec'	120	0.3	1
'LFOA8'	'1 Sec'	120	0.7	4
'LFOA8'	'1 Sec'	120	0.65	3
'LFOA8'	'1 Sec'	120	0.2	1
'LFOA8'	'1 Sec'	120	0.4	1
'LFOA8'	'1 Sec'	120	0.95	5
'LFOA8'	'1 Sec'	120	0.1	1
'LFOA8'	'1 Sec'	120	0.55	2
'LFOA8'	'1 Sec'	120	0.5	2
'LFOA8'	'1 Sec'	120	0.75	4
'LFOA8'	'1 Sec'	120	0.8	4
'LFOA8'	'1 Sec'	120	0.85	4
'LFOA8'	'1 Sec'	120	0.9	4
'LFOA8'	'1 Sec'	120	0.05	1
'LFOA8'	'1 Sec'	120	0.25	1
'LFOA8'	'1 Sec'	120	1	4
'LFOA9'	'1 Sec'	120	0.3	10
'LFOA9'	'1 Sec'	120	0.35	11
'LFOA9'	'1 Sec'	120	0.2	9
'LFOA9'	'1 Sec'	120	0.15	8
'LFOA9'	'1 Sec'	120	0.1	9
'LFOA9'	'1 Sec'	120	0.65	12
'LFOA9'	'1 Sec'	120	0.4	11
'LFOA9'	'1 Sec'	120	0.55	12
'LFOA9'	'1 Sec'	120	0.7	13
'LFOA9'	'1 Sec'	120	0.45	11
'LFOA9'	'1 Sec'	120	0.95	20
'LFOA9'	'1 Sec'	120	0.6	12
'LFOA9'	'1 Sec'	120	0.8	15
'LFOA9'	'1 Sec'	120	0.85	16
'LFOA9'	'1 Sec'	120	0.9	16
'LFOA9'	'1 Sec'	120	1	20
'LFOA9'	'1 Sec'	120	0.05	8
'LFOA9'	'1 Sec'	120	0.25	9
'LFOA9'	'1 Sec'	120	0.5	12
'LFOA9'	'1 Sec'	120	0.75	12
'LFOA10'	'1 Sec'	120	0.95	27
'LFOA10'	'1 Sec'	120	0.15	9
'LFOA10'	'1 Sec'	120	0.55	18
'LFOA10'	'1 Sec'	120	0.65	21
'LFOA10'	'1 Sec'	120	0.1	10
'LFOA10'	'1 Sec'	120	0.4	14
'LFOA10'	'1 Sec'	120	0.35	14
'LFOA10'	'1 Sec'	120	0.45	14
'LFOA10'	'1 Sec'	120	0.7	21
'LFOA10'	'1 Sec'	120	0.6	20
'LFOA10'	'1 Sec'	120	0.3	14
'LFOA10'	'1 Sec'	120	0.2	12
'LFOA10'	'1 Sec'	120	0.9	25
'LFOA10'	'1 Sec'	120	1	17
'LFOA10'	'1 Sec'	120	0.05	10
'LFOA10'	'1 Sec'	120	0.25	13
'LFOA10'	'1 Sec'	120	0.75	20
'LFOA10'	'1 Sec'	120	0.8	24
'LFOA10'	'1 Sec'	120	0.85	25
'LFOA10'	'1 Sec'	120	0.5	17
'LFOA11'	'1 Sec'	120	0.35	4
'LFOA11'	'1 Sec'	120	0.15	2
'LFOA11'	'1 Sec'	120	0.6	4
'LFOA11'	'1 Sec'	120	0.2	2
'LFOA11'	'1 Sec'	120	0.45	3
'LFOA11'	'1 Sec'	120	0.3	3
'LFOA11'	'1 Sec'	120	0.4	4
'LFOA11'	'1 Sec'	120	0.95	9
'LFOA11'	'1 Sec'	120	0.7	4
'LFOA11'	'1 Sec'	120	0.65	4
'LFOA11'	'1 Sec'	120	0.55	3
'LFOA11'	'1 Sec'	120	0.1	2
'LFOA11'	'1 Sec'	120	1	2
'LFOA11'	'1 Sec'	120	0.8	4
'LFOA11'	'1 Sec'	120	0.05	1
'LFOA11'	'1 Sec'	120	0.85	4
'LFOA11'	'1 Sec'	120	0.25	3
'LFOA11'	'1 Sec'	120	0.5	3
'LFOA11'	'1 Sec'	120	0.9	7
'LFOA11'	'1 Sec'	120	0.75	6
'LFOA12'	'1 Sec'	120	0.6	0
'LFOA12'	'1 Sec'	120	0.45	0
'LFOA12'	'1 Sec'	120	0.35	0
'LFOA12'	'1 Sec'	120	0.2	0
'LFOA12'	'1 Sec'	120	0.95	1
'LFOA12'	'1 Sec'	120	0.7	0
'LFOA12'	'1 Sec'	120	0.55	0
'LFOA12'	'1 Sec'	120	0.65	0
'LFOA12'	'1 Sec'	120	0.4	0
'LFOA12'	'1 Sec'	120	0.1	1
'LFOA12'	'1 Sec'	120	0.3	0
'LFOA12'	'1 Sec'	120	0.15	0
'LFOA12'	'1 Sec'	120	0.85	0
'LFOA12'	'1 Sec'	120	1	2
'LFOA12'	'1 Sec'	120	0.25	0
'LFOA12'	'1 Sec'	120	0.9	0
'LFOA12'	'1 Sec'	120	0.5	0
'LFOA12'	'1 Sec'	120	0.75	0
'LFOA12'	'1 Sec'	120	0.8	0
'LFOA12'	'1 Sec'	120	0.05	0
'LFOA13'	'1 Sec'	120	0.95	11
'LFOA13'	'1 Sec'	120	0.55	11
'LFOA13'	'1 Sec'	120	0.3	7
'LFOA13'	'1 Sec'	120	0.2	6
'LFOA13'	'1 Sec'	120	0.1	6
'LFOA13'	'1 Sec'	120	0.4	8
'LFOA13'	'1 Sec'	120	0.65	10
'LFOA13'	'1 Sec'	120	0.6	9
'LFOA13'	'1 Sec'	120	0.35	8
'LFOA13'	'1 Sec'	120	0.15	8
'LFOA13'	'1 Sec'	120	0.45	9
'LFOA13'	'1 Sec'	120	0.7	10
'LFOA13'	'1 Sec'	120	0.75	9
'LFOA13'	'1 Sec'	120	0.9	9
'LFOA13'	'1 Sec'	120	0.05	5
'LFOA13'	'1 Sec'	120	0.8	9
'LFOA13'	'1 Sec'	120	0.25	6
'LFOA13'	'1 Sec'	120	0.85	10
'LFOA13'	'1 Sec'	120	1	7
'LFOA13'	'1 Sec'	120	0.5	10
'LFOA14'	'1 Sec'	120	0.55	3
'LFOA14'	'1 Sec'	120	0.95	7
'LFOA14'	'1 Sec'	120	0.45	3
'LFOA14'	'1 Sec'	120	0.65	3
'LFOA14'	'1 Sec'	120	0.2	6
'LFOA14'	'1 Sec'	120	0.35	4
'LFOA14'	'1 Sec'	120	0.15	4
'LFOA14'	'1 Sec'	120	0.1	4
'LFOA14'	'1 Sec'	120	0.4	3
'LFOA14'	'1 Sec'	120	0.3	4
'LFOA14'	'1 Sec'	120	0.6	3
'LFOA14'	'1 Sec'	120	0.7	4
'LFOA14'	'1 Sec'	120	0.05	4
'LFOA14'	'1 Sec'	120	1	7
'LFOA14'	'1 Sec'	120	0.85	5
'LFOA14'	'1 Sec'	120	0.25	4
'LFOA14'	'1 Sec'	120	0.5	3
'LFOA14'	'1 Sec'	120	0.75	4
'LFOA14'	'1 Sec'	120	0.9	5
'LFOA14'	'1 Sec'	120	0.8	4
'LFOA15'	'1 Sec'	120	0.15	0
'LFOA15'	'1 Sec'	120	0.95	4
'LFOA15'	'1 Sec'	120	0.55	0
'LFOA15'	'1 Sec'	120	0.65	0
'LFOA15'	'1 Sec'	120	0.3	0
'LFOA15'	'1 Sec'	120	0.45	0
'LFOA15'	'1 Sec'	120	0.2	0
'LFOA15'	'1 Sec'	120	0.4	0
'LFOA15'	'1 Sec'	120	0.7	1
'LFOA15'	'1 Sec'	120	0.35	0
'LFOA15'	'1 Sec'	120	0.1	0
'LFOA15'	'1 Sec'	120	0.6	1
'LFOA15'	'1 Sec'	120	0.9	3
'LFOA15'	'1 Sec'	120	0.5	0
'LFOA15'	'1 Sec'	120	0.75	0
'LFOA15'	'1 Sec'	120	0.8	1
'LFOA15'	'1 Sec'	120	0.85	2
'LFOA15'	'1 Sec'	120	0.05	0
'LFOA15'	'1 Sec'	120	1	5
'LFOA15'	'1 Sec'	120	0.25	0
'YA1'	'2 Sec'	120	1	21
'YA1'	'2 Sec'	120	0.5	17
'YA1'	'2 Sec'	120	0.25	17
'YA1'	'2 Sec'	120	0.05	15
'YA1'	'2 Sec'	120	0.95	25
'YA1'	'2 Sec'	120	0.9	26
'YA1'	'2 Sec'	120	0.85	25
'YA1'	'2 Sec'	120	0.8	23
'YA1'	'2 Sec'	120	0.75	20
'YA1'	'2 Sec'	120	0.65	18
'YA1'	'2 Sec'	120	0.2	15
'YA1'	'2 Sec'	120	0.55	18
'YA1'	'2 Sec'	120	0.7	21
'YA1'	'2 Sec'	120	0.3	15
'YA1'	'2 Sec'	120	0.1	16
'YA1'	'2 Sec'	120	0.6	17
'YA1'	'2 Sec'	120	0.4	15
'YA1'	'2 Sec'	120	0.45	16
'YA1'	'2 Sec'	120	0.15	17
'YA1'	'2 Sec'	120	0.35	16
'YA2'	'2 Sec'	120	1	13
'YA2'	'2 Sec'	120	0.25	15
'YA2'	'2 Sec'	120	0.05	10
'YA2'	'2 Sec'	120	0.9	13
'YA2'	'2 Sec'	120	0.85	13
'YA2'	'2 Sec'	120	0.8	14
'YA2'	'2 Sec'	120	0.75	14
'YA2'	'2 Sec'	120	0.5	15
'YA2'	'2 Sec'	120	0.6	13
'YA2'	'2 Sec'	120	0.3	15
'YA2'	'2 Sec'	120	0.7	14
'YA2'	'2 Sec'	120	0.95	13
'YA2'	'2 Sec'	120	0.65	13
'YA2'	'2 Sec'	120	0.2	12
'YA2'	'2 Sec'	120	0.4	15
'YA2'	'2 Sec'	120	0.1	12
'YA2'	'2 Sec'	120	0.55	13
'YA2'	'2 Sec'	120	0.35	14
'YA2'	'2 Sec'	120	0.45	14
'YA2'	'2 Sec'	120	0.15	12
'YA3'	'2 Sec'	120	1	13
'YA3'	'2 Sec'	120	0.95	21
'YA3'	'2 Sec'	120	0.85	23
'YA3'	'2 Sec'	120	0.8	20
'YA3'	'2 Sec'	120	0.75	19
'YA3'	'2 Sec'	120	0.5	20
'YA3'	'2 Sec'	120	0.25	11
'YA3'	'2 Sec'	120	0.05	11
'YA3'	'2 Sec'	120	0.9	21
'YA3'	'2 Sec'	120	0.6	19
'YA3'	'2 Sec'	120	0.4	14
'YA3'	'2 Sec'	120	0.2	11
'YA3'	'2 Sec'	120	0.1	13
'YA3'	'2 Sec'	120	0.65	18
'YA3'	'2 Sec'	120	0.55	16
'YA3'	'2 Sec'	120	0.3	13
'YA3'	'2 Sec'	120	0.7	20
'YA3'	'2 Sec'	120	0.45	14
'YA3'	'2 Sec'	120	0.15	14
'YA3'	'2 Sec'	120	0.35	13
'YA4'	'2 Sec'	120	1	10
'YA4'	'2 Sec'	120	0.9	11
'YA4'	'2 Sec'	120	0.85	10
'YA4'	'2 Sec'	120	0.8	9
'YA4'	'2 Sec'	120	0.75	9
'YA4'	'2 Sec'	120	0.5	10
'YA4'	'2 Sec'	120	0.25	10
'YA4'	'2 Sec'	120	0.05	9
'YA4'	'2 Sec'	120	0.7	9
'YA4'	'2 Sec'	120	0.4	10
'YA4'	'2 Sec'	120	0.55	10
'YA4'	'2 Sec'	120	0.1	8
'YA4'	'2 Sec'	120	0.95	11
'YA4'	'2 Sec'	120	0.6	9
'YA4'	'2 Sec'	120	0.2	10
'YA4'	'2 Sec'	120	0.65	9
'YA4'	'2 Sec'	120	0.3	10
'YA4'	'2 Sec'	120	0.35	10
'YA4'	'2 Sec'	120	0.45	11
'YA4'	'2 Sec'	120	0.15	10
'YA5'	'2 Sec'	120	1	6
'YA5'	'2 Sec'	120	0.95	11
'YA5'	'2 Sec'	120	0.9	13
'YA5'	'2 Sec'	120	0.85	15
'YA5'	'2 Sec'	120	0.8	12
'YA5'	'2 Sec'	120	0.75	13
'YA5'	'2 Sec'	120	0.5	14
'YA5'	'2 Sec'	120	0.25	12
'YA5'	'2 Sec'	120	0.05	9
'YA5'	'2 Sec'	120	0.65	11
'YA5'	'2 Sec'	120	0.4	13
'YA5'	'2 Sec'	120	0.3	11
'YA5'	'2 Sec'	120	0.1	9
'YA5'	'2 Sec'	120	0.7	10
'YA5'	'2 Sec'	120	0.2	12
'YA5'	'2 Sec'	120	0.55	14
'YA5'	'2 Sec'	120	0.6	12
'YA5'	'2 Sec'	120	0.15	12
'YA5'	'2 Sec'	120	0.35	13
'YA5'	'2 Sec'	120	0.45	13
'YA6'	'2 Sec'	120	0.85	17
'YA6'	'2 Sec'	120	1	9
'YA6'	'2 Sec'	120	0.8	16
'YA6'	'2 Sec'	120	0.75	17
'YA6'	'2 Sec'	120	0.5	10
'YA6'	'2 Sec'	120	0.25	12
'YA6'	'2 Sec'	120	0.05	8
'YA6'	'2 Sec'	120	0.9	15
'YA6'	'2 Sec'	120	0.55	11
'YA6'	'2 Sec'	120	0.3	11
'YA6'	'2 Sec'	120	0.7	16
'YA6'	'2 Sec'	120	0.95	14
'YA6'	'2 Sec'	120	0.4	9
'YA6'	'2 Sec'	120	0.65	14
'YA6'	'2 Sec'	120	0.6	12
'YA6'	'2 Sec'	120	0.1	10
'YA6'	'2 Sec'	120	0.2	12
'YA6'	'2 Sec'	120	0.35	10
'YA6'	'2 Sec'	120	0.15	12
'YA6'	'2 Sec'	120	0.45	10
'YA7'	'2 Sec'	120	1	10
'YA7'	'2 Sec'	120	0.85	17
'YA7'	'2 Sec'	120	0.8	12
'YA7'	'2 Sec'	120	0.75	12
'YA7'	'2 Sec'	120	0.5	10
'YA7'	'2 Sec'	120	0.05	6
'YA7'	'2 Sec'	120	0.25	7
'YA7'	'2 Sec'	120	0.9	18
'YA7'	'2 Sec'	120	0.95	16
'YA7'	'2 Sec'	120	0.4	8
'YA7'	'2 Sec'	120	0.55	10
'YA7'	'2 Sec'	120	0.6	9
'YA7'	'2 Sec'	120	0.65	9
'YA7'	'2 Sec'	120	0.7	10
'YA7'	'2 Sec'	120	0.1	8
'YA7'	'2 Sec'	120	0.2	8
'YA7'	'2 Sec'	120	0.3	8
'YA7'	'2 Sec'	120	0.45	10
'YA7'	'2 Sec'	120	0.35	8
'YA7'	'2 Sec'	120	0.15	8
'YA8'	'2 Sec'	120	0.95	12
'YA8'	'2 Sec'	120	0.4	2
'YA8'	'2 Sec'	120	0.55	4
'YA8'	'2 Sec'	120	0.6	4
'YA8'	'2 Sec'	120	0.65	5
'YA8'	'2 Sec'	120	0.1	1
'YA8'	'2 Sec'	120	0.7	5
'YA8'	'2 Sec'	120	0.2	3
'YA8'	'2 Sec'	120	0.3	2
'YA8'	'2 Sec'	120	1	9
'YA8'	'2 Sec'	120	0.25	2
'YA8'	'2 Sec'	120	0.05	1
'YA8'	'2 Sec'	120	0.9	8
'YA8'	'2 Sec'	120	0.85	6
'YA8'	'2 Sec'	120	0.8	5
'YA8'	'2 Sec'	120	0.5	4
'YA8'	'2 Sec'	120	0.75	5
'YA8'	'2 Sec'	120	0.45	3
'YA8'	'2 Sec'	120	0.15	1
'YA8'	'2 Sec'	120	0.35	2
'YA9'	'2 Sec'	120	0.25	13
'YA9'	'2 Sec'	120	0.05	8
'YA9'	'2 Sec'	120	0.75	16
'YA9'	'2 Sec'	120	1	12
'YA9'	'2 Sec'	120	0.9	16
'YA9'	'2 Sec'	120	0.85	17
'YA9'	'2 Sec'	120	0.8	15
'YA9'	'2 Sec'	120	0.5	14
'YA9'	'2 Sec'	120	0.95	14
'YA9'	'2 Sec'	120	0.4	13
'YA9'	'2 Sec'	120	0.55	15
'YA9'	'2 Sec'	120	0.6	16
'YA9'	'2 Sec'	120	0.65	17
'YA9'	'2 Sec'	120	0.1	11
'YA9'	'2 Sec'	120	0.7	16
'YA9'	'2 Sec'	120	0.2	12
'YA9'	'2 Sec'	120	0.3	13
'YA9'	'2 Sec'	120	0.35	13
'YA9'	'2 Sec'	120	0.15	10
'YA9'	'2 Sec'	120	0.45	14
'YA10'	'2 Sec'	120	1	8
'YA10'	'2 Sec'	120	0.9	11
'YA10'	'2 Sec'	120	0.85	9
'YA10'	'2 Sec'	120	0.8	10
'YA10'	'2 Sec'	120	0.75	11
'YA10'	'2 Sec'	120	0.5	12
'YA10'	'2 Sec'	120	0.25	9
'YA10'	'2 Sec'	120	0.05	7
'YA10'	'2 Sec'	120	0.55	11
'YA10'	'2 Sec'	120	0.6	10
'YA10'	'2 Sec'	120	0.65	10
'YA10'	'2 Sec'	120	0.7	10
'YA10'	'2 Sec'	120	0.1	7
'YA10'	'2 Sec'	120	0.2	10
'YA10'	'2 Sec'	120	0.95	12
'YA10'	'2 Sec'	120	0.3	8
'YA10'	'2 Sec'	120	0.4	11
'YA10'	'2 Sec'	120	0.45	12
'YA10'	'2 Sec'	120	0.15	10
'YA10'	'2 Sec'	120	0.35	9
'YA11'	'2 Sec'	120	0.55	5
'YA11'	'2 Sec'	120	0.6	7
'YA11'	'2 Sec'	120	0.65	7
'YA11'	'2 Sec'	120	0.1	4
'YA11'	'2 Sec'	120	0.7	6
'YA11'	'2 Sec'	120	0.2	4
'YA11'	'2 Sec'	120	0.3	3
'YA11'	'2 Sec'	120	0.95	5
'YA11'	'2 Sec'	120	0.4	5
'YA11'	'2 Sec'	120	0.45	4
'YA11'	'2 Sec'	120	0.5	5
'YA11'	'2 Sec'	120	1	6
'YA11'	'2 Sec'	120	0.75	6
'YA11'	'2 Sec'	120	0.9	6
'YA11'	'2 Sec'	120	0.8	6
'YA11'	'2 Sec'	120	0.05	1
'YA11'	'2 Sec'	120	0.85	6
'YA11'	'2 Sec'	120	0.25	2
'YA11'	'2 Sec'	120	0.15	2
'YA11'	'2 Sec'	120	0.35	3
'YA12'	'2 Sec'	120	0.55	15
'YA12'	'2 Sec'	120	0.6	13
'YA12'	'2 Sec'	120	0.65	13
'YA12'	'2 Sec'	120	0.7	15
'YA12'	'2 Sec'	120	0.1	11
'YA12'	'2 Sec'	120	0.2	12
'YA12'	'2 Sec'	120	0.95	14
'YA12'	'2 Sec'	120	0.3	12
'YA12'	'2 Sec'	120	0.4	14
'YA12'	'2 Sec'	120	0.8	15
'YA12'	'2 Sec'	120	0.9	17
'YA12'	'2 Sec'	120	0.85	17
'YA12'	'2 Sec'	120	0.5	14
'YA12'	'2 Sec'	120	1	11
'YA12'	'2 Sec'	120	0.75	15
'YA12'	'2 Sec'	120	0.05	12
'YA12'	'2 Sec'	120	0.25	12
'YA12'	'2 Sec'	120	0.35	14
'YA12'	'2 Sec'	120	0.45	14
'YA12'	'2 Sec'	120	0.15	12
'YA13'	'2 Sec'	120	1	7
'YA13'	'2 Sec'	120	0.9	9
'YA13'	'2 Sec'	120	0.75	10
'YA13'	'2 Sec'	120	0.5	10
'YA13'	'2 Sec'	120	0.25	8
'YA13'	'2 Sec'	120	0.05	4
'YA13'	'2 Sec'	120	0.85	9
'YA13'	'2 Sec'	120	0.8	11
'YA13'	'2 Sec'	120	0.6	10
'YA13'	'2 Sec'	120	0.65	10
'YA13'	'2 Sec'	120	0.7	10
'YA13'	'2 Sec'	120	0.2	9
'YA13'	'2 Sec'	120	0.3	11
'YA13'	'2 Sec'	120	0.95	8
'YA13'	'2 Sec'	120	0.4	10
'YA13'	'2 Sec'	120	0.55	10
'YA13'	'2 Sec'	120	0.1	8
'YA13'	'2 Sec'	120	0.15	10
'YA13'	'2 Sec'	120	0.45	9
'YA13'	'2 Sec'	120	0.35	11
'YA14'	'2 Sec'	120	0.65	23
'YA14'	'2 Sec'	120	0.1	14
'YA14'	'2 Sec'	120	0.7	25
'YA14'	'2 Sec'	120	0.2	16
'YA14'	'2 Sec'	120	0.3	20
'YA14'	'2 Sec'	120	0.4	18
'YA14'	'2 Sec'	120	0.55	23
'YA14'	'2 Sec'	120	0.95	22
'YA14'	'2 Sec'	120	0.6	22
'YA14'	'2 Sec'	120	1	21
'YA14'	'2 Sec'	120	0.5	23
'YA14'	'2 Sec'	120	0.9	26
'YA14'	'2 Sec'	120	0.05	12
'YA14'	'2 Sec'	120	0.85	22
'YA14'	'2 Sec'	120	0.75	27
'YA14'	'2 Sec'	120	0.25	14
'YA14'	'2 Sec'	120	0.8	29
'YA14'	'2 Sec'	120	0.45	20
'YA14'	'2 Sec'	120	0.15	16
'YA14'	'2 Sec'	120	0.35	21
'YA15'	'2 Sec'	120	0.65	19
'YA15'	'2 Sec'	120	0.7	19
'YA15'	'2 Sec'	120	0.3	16
'YA15'	'2 Sec'	120	0.4	19
'YA15'	'2 Sec'	120	0.55	17
'YA15'	'2 Sec'	120	0.95	15
'YA15'	'2 Sec'	120	0.6	18
'YA15'	'2 Sec'	120	0.2	20
'YA15'	'2 Sec'	120	0.1	17
'YA15'	'2 Sec'	120	0.85	16
'YA15'	'2 Sec'	120	0.5	17
'YA15'	'2 Sec'	120	0.05	16
'YA15'	'2 Sec'	120	1	15
'YA15'	'2 Sec'	120	0.75	17
'YA15'	'2 Sec'	120	0.9	14
'YA15'	'2 Sec'	120	0.8	17
'YA15'	'2 Sec'	120	0.25	16
'YA15'	'2 Sec'	120	0.35	16
'YA15'	'2 Sec'	120	0.45	17
'YA15'	'2 Sec'	120	0.15	16
'HFOA1'	'2 Sec'	120	1	5
'HFOA1'	'2 Sec'	120	0.9	9
'HFOA1'	'2 Sec'	120	0.85	10
'HFOA1'	'2 Sec'	120	0.8	10
'HFOA1'	'2 Sec'	120	0.75	10
'HFOA1'	'2 Sec'	120	0.5	10
'HFOA1'	'2 Sec'	120	0.25	8
'HFOA1'	'2 Sec'	120	0.05	7
'HFOA1'	'2 Sec'	120	0.65	11
'HFOA1'	'2 Sec'	120	0.7	12
'HFOA1'	'2 Sec'	120	0.3	9
'HFOA1'	'2 Sec'	120	0.4	9
'HFOA1'	'2 Sec'	120	0.55	10
'HFOA1'	'2 Sec'	120	0.6	10
'HFOA1'	'2 Sec'	120	0.95	6
'HFOA1'	'2 Sec'	120	0.1	6
'HFOA1'	'2 Sec'	120	0.2	8
'HFOA1'	'2 Sec'	120	0.15	7
'HFOA1'	'2 Sec'	120	0.45	11
'HFOA1'	'2 Sec'	120	0.35	10
'HFOA2'	'2 Sec'	120	1	3
'HFOA2'	'2 Sec'	120	0.95	7
'HFOA2'	'2 Sec'	120	0.9	7
'HFOA2'	'2 Sec'	120	0.85	12
'HFOA2'	'2 Sec'	120	0.8	9
'HFOA2'	'2 Sec'	120	0.75	11
'HFOA2'	'2 Sec'	120	0.5	7
'HFOA2'	'2 Sec'	120	0.25	5
'HFOA2'	'2 Sec'	120	0.05	4
'HFOA2'	'2 Sec'	120	0.7	9
'HFOA2'	'2 Sec'	120	0.65	6
'HFOA2'	'2 Sec'	120	0.6	6
'HFOA2'	'2 Sec'	120	0.3	7
'HFOA2'	'2 Sec'	120	0.1	6
'HFOA2'	'2 Sec'	120	0.55	7
'HFOA2'	'2 Sec'	120	0.2	5
'HFOA2'	'2 Sec'	120	0.4	6
'HFOA2'	'2 Sec'	120	0.15	5
'HFOA2'	'2 Sec'	120	0.35	6
'HFOA2'	'2 Sec'	120	0.45	7
'HFOA3'	'2 Sec'	120	1	4
'HFOA3'	'2 Sec'	120	0.9	13
'HFOA3'	'2 Sec'	120	0.85	14
'HFOA3'	'2 Sec'	120	0.8	18
'HFOA3'	'2 Sec'	120	0.75	16
'HFOA3'	'2 Sec'	120	0.5	14
'HFOA3'	'2 Sec'	120	0.25	15
'HFOA3'	'2 Sec'	120	0.05	11
'HFOA3'	'2 Sec'	120	0.4	13
'HFOA3'	'2 Sec'	120	0.7	14
'HFOA3'	'2 Sec'	120	0.1	9
'HFOA3'	'2 Sec'	120	0.55	15
'HFOA3'	'2 Sec'	120	0.2	11
'HFOA3'	'2 Sec'	120	0.6	12
'HFOA3'	'2 Sec'	120	0.3	14
'HFOA3'	'2 Sec'	120	0.95	12
'HFOA3'	'2 Sec'	120	0.65	15
'HFOA3'	'2 Sec'	120	0.35	13
'HFOA3'	'2 Sec'	120	0.45	14
'HFOA3'	'2 Sec'	120	0.15	10
'HFOA4'	'2 Sec'	120	1	3
'HFOA4'	'2 Sec'	120	0.9	8
'HFOA4'	'2 Sec'	120	0.85	7
'HFOA4'	'2 Sec'	120	0.8	8
'HFOA4'	'2 Sec'	120	0.75	8
'HFOA4'	'2 Sec'	120	0.5	5
'HFOA4'	'2 Sec'	120	0.25	4
'HFOA4'	'2 Sec'	120	0.05	2
'HFOA4'	'2 Sec'	120	0.2	3
'HFOA4'	'2 Sec'	120	0.55	6
'HFOA4'	'2 Sec'	120	0.7	8
'HFOA4'	'2 Sec'	120	0.95	7
'HFOA4'	'2 Sec'	120	0.1	1
'HFOA4'	'2 Sec'	120	0.3	4
'HFOA4'	'2 Sec'	120	0.6	7
'HFOA4'	'2 Sec'	120	0.4	3
'HFOA4'	'2 Sec'	120	0.65	7
'HFOA4'	'2 Sec'	120	0.45	5
'HFOA4'	'2 Sec'	120	0.15	3
'HFOA4'	'2 Sec'	120	0.35	4
'HFOA5'	'2 Sec'	120	1	6
'HFOA5'	'2 Sec'	120	0.9	12
'HFOA5'	'2 Sec'	120	0.85	12
'HFOA5'	'2 Sec'	120	0.8	10
'HFOA5'	'2 Sec'	120	0.75	9
'HFOA5'	'2 Sec'	120	0.25	9
'HFOA5'	'2 Sec'	120	0.05	7
'HFOA5'	'2 Sec'	120	0.5	9
'HFOA5'	'2 Sec'	120	0.95	9
'HFOA5'	'2 Sec'	120	0.6	9
'HFOA5'	'2 Sec'	120	0.3	8
'HFOA5'	'2 Sec'	120	0.65	9
'HFOA5'	'2 Sec'	120	0.4	9
'HFOA5'	'2 Sec'	120	0.7	9
'HFOA5'	'2 Sec'	120	0.55	9
'HFOA5'	'2 Sec'	120	0.2	8
'HFOA5'	'2 Sec'	120	0.1	8
'HFOA5'	'2 Sec'	120	0.45	8
'HFOA5'	'2 Sec'	120	0.15	10
'HFOA5'	'2 Sec'	120	0.35	9
'HFOA6'	'2 Sec'	120	1	11
'HFOA6'	'2 Sec'	120	0.25	8
'HFOA6'	'2 Sec'	120	0.05	10
'HFOA6'	'2 Sec'	120	0.9	13
'HFOA6'	'2 Sec'	120	0.85	12
'HFOA6'	'2 Sec'	120	0.8	10
'HFOA6'	'2 Sec'	120	0.75	9
'HFOA6'	'2 Sec'	120	0.5	8
'HFOA6'	'2 Sec'	120	0.1	7
'HFOA6'	'2 Sec'	120	0.4	8
'HFOA6'	'2 Sec'	120	0.55	8
'HFOA6'	'2 Sec'	120	0.6	7
'HFOA6'	'2 Sec'	120	0.95	17
'HFOA6'	'2 Sec'	120	0.2	6
'HFOA6'	'2 Sec'	120	0.65	9
'HFOA6'	'2 Sec'	120	0.7	9
'HFOA6'	'2 Sec'	120	0.3	8
'HFOA6'	'2 Sec'	120	0.35	8
'HFOA6'	'2 Sec'	120	0.15	8
'HFOA6'	'2 Sec'	120	0.45	8
'HFOA7'	'2 Sec'	120	1	5
'HFOA7'	'2 Sec'	120	0.9	10
'HFOA7'	'2 Sec'	120	0.85	13
'HFOA7'	'2 Sec'	120	0.8	9
'HFOA7'	'2 Sec'	120	0.75	14
'HFOA7'	'2 Sec'	120	0.5	9
'HFOA7'	'2 Sec'	120	0.25	6
'HFOA7'	'2 Sec'	120	0.05	1
'HFOA7'	'2 Sec'	120	0.95	5
'HFOA7'	'2 Sec'	120	0.6	11
'HFOA7'	'2 Sec'	120	0.65	10
'HFOA7'	'2 Sec'	120	0.3	9
'HFOA7'	'2 Sec'	120	0.2	7
'HFOA7'	'2 Sec'	120	0.7	11
'HFOA7'	'2 Sec'	120	0.1	3
'HFOA7'	'2 Sec'	120	0.4	8
'HFOA7'	'2 Sec'	120	0.55	9
'HFOA7'	'2 Sec'	120	0.45	11
'HFOA7'	'2 Sec'	120	0.15	5
'HFOA7'	'2 Sec'	120	0.35	8
'HFOA8'	'2 Sec'	120	1	9
'HFOA8'	'2 Sec'	120	0.9	11
'HFOA8'	'2 Sec'	120	0.85	9
'HFOA8'	'2 Sec'	120	0.8	6
'HFOA8'	'2 Sec'	120	0.75	6
'HFOA8'	'2 Sec'	120	0.5	6
'HFOA8'	'2 Sec'	120	0.25	7
'HFOA8'	'2 Sec'	120	0.05	3
'HFOA8'	'2 Sec'	120	0.2	7
'HFOA8'	'2 Sec'	120	0.65	7
'HFOA8'	'2 Sec'	120	0.95	6
'HFOA8'	'2 Sec'	120	0.4	6
'HFOA8'	'2 Sec'	120	0.55	7
'HFOA8'	'2 Sec'	120	0.3	7
'HFOA8'	'2 Sec'	120	0.7	9
'HFOA8'	'2 Sec'	120	0.1	4
'HFOA8'	'2 Sec'	120	0.6	6
'HFOA8'	'2 Sec'	120	0.15	6
'HFOA8'	'2 Sec'	120	0.35	8
'HFOA8'	'2 Sec'	120	0.45	5
'HFOA9'	'2 Sec'	120	1	2
'HFOA9'	'2 Sec'	120	0.9	9
'HFOA9'	'2 Sec'	120	0.85	9
'HFOA9'	'2 Sec'	120	0.8	9
'HFOA9'	'2 Sec'	120	0.75	5
'HFOA9'	'2 Sec'	120	0.5	8
'HFOA9'	'2 Sec'	120	0.25	6
'HFOA9'	'2 Sec'	120	0.05	2
'HFOA9'	'2 Sec'	120	0.6	4
'HFOA9'	'2 Sec'	120	0.95	9
'HFOA9'	'2 Sec'	120	0.4	9
'HFOA9'	'2 Sec'	120	0.65	5
'HFOA9'	'2 Sec'	120	0.2	5
'HFOA9'	'2 Sec'	120	0.55	8
'HFOA9'	'2 Sec'	120	0.1	2
'HFOA9'	'2 Sec'	120	0.7	9
'HFOA9'	'2 Sec'	120	0.3	6
'HFOA9'	'2 Sec'	120	0.35	4
'HFOA9'	'2 Sec'	120	0.15	2
'HFOA9'	'2 Sec'	120	0.45	8
'HFOA10'	'2 Sec'	120	1	17
'HFOA10'	'2 Sec'	120	0.9	21
'HFOA10'	'2 Sec'	120	0.85	22
'HFOA10'	'2 Sec'	120	0.8	21
'HFOA10'	'2 Sec'	120	0.75	22
'HFOA10'	'2 Sec'	120	0.5	18
'HFOA10'	'2 Sec'	120	0.25	13
'HFOA10'	'2 Sec'	120	0.05	13
'HFOA10'	'2 Sec'	120	0.95	22
'HFOA10'	'2 Sec'	120	0.65	20
'HFOA10'	'2 Sec'	120	0.1	14
'HFOA10'	'2 Sec'	120	0.3	14
'HFOA10'	'2 Sec'	120	0.6	20
'HFOA10'	'2 Sec'	120	0.7	19
'HFOA10'	'2 Sec'	120	0.4	18
'HFOA10'	'2 Sec'	120	0.55	18
'HFOA10'	'2 Sec'	120	0.2	13
'HFOA10'	'2 Sec'	120	0.35	16
'HFOA10'	'2 Sec'	120	0.15	12
'HFOA10'	'2 Sec'	120	0.45	17
'HFOA11'	'2 Sec'	120	0.95	15
'HFOA11'	'2 Sec'	120	0.7	18
'HFOA11'	'2 Sec'	120	0.55	12
'HFOA11'	'2 Sec'	120	0.4	14
'HFOA11'	'2 Sec'	120	0.6	14
'HFOA11'	'2 Sec'	120	0.65	16
'HFOA11'	'2 Sec'	120	0.2	8
'HFOA11'	'2 Sec'	120	0.3	12
'HFOA11'	'2 Sec'	120	0.1	7
'HFOA11'	'2 Sec'	120	0.8	18
'HFOA11'	'2 Sec'	120	1	9
'HFOA11'	'2 Sec'	120	0.85	18
'HFOA11'	'2 Sec'	120	0.9	16
'HFOA11'	'2 Sec'	120	0.5	13
'HFOA11'	'2 Sec'	120	0.05	5
'HFOA11'	'2 Sec'	120	0.75	19
'HFOA11'	'2 Sec'	120	0.25	11
'HFOA11'	'2 Sec'	120	0.15	8
'HFOA11'	'2 Sec'	120	0.45	11
'HFOA11'	'2 Sec'	120	0.35	12
'HFOA12'	'2 Sec'	120	0.95	10
'HFOA12'	'2 Sec'	120	0.2	7
'HFOA12'	'2 Sec'	120	0.6	9
'HFOA12'	'2 Sec'	120	0.65	9
'HFOA12'	'2 Sec'	120	0.55	9
'HFOA12'	'2 Sec'	120	0.3	8
'HFOA12'	'2 Sec'	120	0.7	9
'HFOA12'	'2 Sec'	120	0.1	7
'HFOA12'	'2 Sec'	120	0.4	7
'HFOA12'	'2 Sec'	120	1	7
'HFOA12'	'2 Sec'	120	0.5	8
'HFOA12'	'2 Sec'	120	0.05	7
'HFOA12'	'2 Sec'	120	0.8	11
'HFOA12'	'2 Sec'	120	0.75	10
'HFOA12'	'2 Sec'	120	0.25	8
'HFOA12'	'2 Sec'	120	0.9	14
'HFOA12'	'2 Sec'	120	0.85	13
'HFOA12'	'2 Sec'	120	0.45	8
'HFOA12'	'2 Sec'	120	0.15	10
'HFOA12'	'2 Sec'	120	0.35	8
'HFOA13'	'2 Sec'	120	0.6	3
'HFOA13'	'2 Sec'	120	0.3	6
'HFOA13'	'2 Sec'	120	0.2	4
'HFOA13'	'2 Sec'	120	0.1	5
'HFOA13'	'2 Sec'	120	0.95	11
'HFOA13'	'2 Sec'	120	0.55	5
'HFOA13'	'2 Sec'	120	0.7	6
'HFOA13'	'2 Sec'	120	0.65	4
'HFOA13'	'2 Sec'	120	0.4	5
'HFOA13'	'2 Sec'	120	0.85	11
'HFOA13'	'2 Sec'	120	0.9	11
'HFOA13'	'2 Sec'	120	0.05	0
'HFOA13'	'2 Sec'	120	0.8	10
'HFOA13'	'2 Sec'	120	0.5	6
'HFOA13'	'2 Sec'	120	0.25	3
'HFOA13'	'2 Sec'	120	1	2
'HFOA13'	'2 Sec'	120	0.75	7
'HFOA13'	'2 Sec'	120	0.35	5
'HFOA13'	'2 Sec'	120	0.45	6
'HFOA13'	'2 Sec'	120	0.15	3
'HFOA14'	'2 Sec'	120	0.3	10
'HFOA14'	'2 Sec'	120	0.55	13
'HFOA14'	'2 Sec'	120	0.2	11
'HFOA14'	'2 Sec'	120	0.95	12
'HFOA14'	'2 Sec'	120	0.7	13
'HFOA14'	'2 Sec'	120	0.6	12
'HFOA14'	'2 Sec'	120	0.4	12
'HFOA14'	'2 Sec'	120	0.65	12
'HFOA14'	'2 Sec'	120	0.1	10
'HFOA14'	'2 Sec'	120	0.05	7
'HFOA14'	'2 Sec'	120	0.75	15
'HFOA14'	'2 Sec'	120	0.9	12
'HFOA14'	'2 Sec'	120	0.8	14
'HFOA14'	'2 Sec'	120	0.25	11
'HFOA14'	'2 Sec'	120	1	10
'HFOA14'	'2 Sec'	120	0.5	13
'HFOA14'	'2 Sec'	120	0.85	15
'HFOA14'	'2 Sec'	120	0.45	13
'HFOA14'	'2 Sec'	120	0.15	10
'HFOA14'	'2 Sec'	120	0.35	10
'HFOA15'	'2 Sec'	120	0.7	6
'HFOA15'	'2 Sec'	120	0.65	5
'HFOA15'	'2 Sec'	120	0.6	5
'HFOA15'	'2 Sec'	120	0.2	2
'HFOA15'	'2 Sec'	120	0.95	8
'HFOA15'	'2 Sec'	120	0.4	3
'HFOA15'	'2 Sec'	120	0.3	2
'HFOA15'	'2 Sec'	120	0.1	1
'HFOA15'	'2 Sec'	120	0.55	5
'HFOA15'	'2 Sec'	120	1	13
'HFOA15'	'2 Sec'	120	0.9	5
'HFOA15'	'2 Sec'	120	0.75	6
'HFOA15'	'2 Sec'	120	0.8	6
'HFOA15'	'2 Sec'	120	0.85	7
'HFOA15'	'2 Sec'	120	0.05	0
'HFOA15'	'2 Sec'	120	0.25	2
'HFOA15'	'2 Sec'	120	0.5	5
'HFOA15'	'2 Sec'	120	0.15	2
'HFOA15'	'2 Sec'	120	0.45	4
'HFOA15'	'2 Sec'	120	0.35	2
'LFOA1'	'2 Sec'	120	1	3
'LFOA1'	'2 Sec'	120	0.9	5
'LFOA1'	'2 Sec'	120	0.85	5
'LFOA1'	'2 Sec'	120	0.8	4
'LFOA1'	'2 Sec'	120	0.75	5
'LFOA1'	'2 Sec'	120	0.5	5
'LFOA1'	'2 Sec'	120	0.25	4
'LFOA1'	'2 Sec'	120	0.05	2
'LFOA1'	'2 Sec'	120	0.6	5
'LFOA1'	'2 Sec'	120	0.4	5
'LFOA1'	'2 Sec'	120	0.7	4
'LFOA1'	'2 Sec'	120	0.95	5
'LFOA1'	'2 Sec'	120	0.55	5
'LFOA1'	'2 Sec'	120	0.65	4
'LFOA1'	'2 Sec'	120	0.2	4
'LFOA1'	'2 Sec'	120	0.1	3
'LFOA1'	'2 Sec'	120	0.3	5
'LFOA1'	'2 Sec'	120	0.35	5
'LFOA1'	'2 Sec'	120	0.15	3
'LFOA1'	'2 Sec'	120	0.45	4
'LFOA2'	'2 Sec'	120	1	2
'LFOA2'	'2 Sec'	120	0.9	13
'LFOA2'	'2 Sec'	120	0.85	10
'LFOA2'	'2 Sec'	120	0.8	8
'LFOA2'	'2 Sec'	120	0.75	6
'LFOA2'	'2 Sec'	120	0.5	6
'LFOA2'	'2 Sec'	120	0.25	2
'LFOA2'	'2 Sec'	120	0.05	0
'LFOA2'	'2 Sec'	120	0.55	8
'LFOA2'	'2 Sec'	120	0.6	8
'LFOA2'	'2 Sec'	120	0.1	6
'LFOA2'	'2 Sec'	120	0.4	7
'LFOA2'	'2 Sec'	120	0.65	7
'LFOA2'	'2 Sec'	120	0.3	6
'LFOA2'	'2 Sec'	120	0.7	7
'LFOA2'	'2 Sec'	120	0.95	10
'LFOA2'	'2 Sec'	120	0.2	5
'LFOA2'	'2 Sec'	120	0.45	8
'LFOA2'	'2 Sec'	120	0.15	6
'LFOA2'	'2 Sec'	120	0.35	6
'LFOA3'	'2 Sec'	120	0.95	6
'LFOA3'	'2 Sec'	120	0.65	2
'LFOA3'	'2 Sec'	120	0.7	2
'LFOA3'	'2 Sec'	120	0.55	1
'LFOA3'	'2 Sec'	120	0.6	2
'LFOA3'	'2 Sec'	120	0.3	1
'LFOA3'	'2 Sec'	120	0.4	2
'LFOA3'	'2 Sec'	120	0.2	1
'LFOA3'	'2 Sec'	120	0.1	0
'LFOA3'	'2 Sec'	120	0.8	1
'LFOA3'	'2 Sec'	120	1	5
'LFOA3'	'2 Sec'	120	0.05	0
'LFOA3'	'2 Sec'	120	0.85	1
'LFOA3'	'2 Sec'	120	0.25	1
'LFOA3'	'2 Sec'	120	0.75	2
'LFOA3'	'2 Sec'	120	0.9	1
'LFOA3'	'2 Sec'	120	0.5	2
'LFOA3'	'2 Sec'	120	0.15	1
'LFOA3'	'2 Sec'	120	0.35	2
'LFOA3'	'2 Sec'	120	0.45	2
'LFOA4'	'2 Sec'	120	1	12
'LFOA4'	'2 Sec'	120	0.9	18
'LFOA4'	'2 Sec'	120	0.85	17
'LFOA4'	'2 Sec'	120	0.8	19
'LFOA4'	'2 Sec'	120	0.75	16
'LFOA4'	'2 Sec'	120	0.5	14
'LFOA4'	'2 Sec'	120	0.25	11
'LFOA4'	'2 Sec'	120	0.05	9
'LFOA4'	'2 Sec'	120	0.55	15
'LFOA4'	'2 Sec'	120	0.7	17
'LFOA4'	'2 Sec'	120	0.3	12
'LFOA4'	'2 Sec'	120	0.6	16
'LFOA4'	'2 Sec'	120	0.4	13
'LFOA4'	'2 Sec'	120	0.1	11
'LFOA4'	'2 Sec'	120	0.65	16
'LFOA4'	'2 Sec'	120	0.95	16
'LFOA4'	'2 Sec'	120	0.2	12
'LFOA4'	'2 Sec'	120	0.45	17
'LFOA4'	'2 Sec'	120	0.15	12
'LFOA4'	'2 Sec'	120	0.35	12
'LFOA5'	'2 Sec'	120	1	2
'LFOA5'	'2 Sec'	120	0.9	4
'LFOA5'	'2 Sec'	120	0.85	5
'LFOA5'	'2 Sec'	120	0.8	4
'LFOA5'	'2 Sec'	120	0.75	2
'LFOA5'	'2 Sec'	120	0.5	2
'LFOA5'	'2 Sec'	120	0.25	2
'LFOA5'	'2 Sec'	120	0.05	2
'LFOA5'	'2 Sec'	120	0.3	2
'LFOA5'	'2 Sec'	120	0.7	2
'LFOA5'	'2 Sec'	120	0.6	2
'LFOA5'	'2 Sec'	120	0.4	2
'LFOA5'	'2 Sec'	120	0.1	2
'LFOA5'	'2 Sec'	120	0.55	2
'LFOA5'	'2 Sec'	120	0.95	5
'LFOA5'	'2 Sec'	120	0.2	2
'LFOA5'	'2 Sec'	120	0.65	2
'LFOA5'	'2 Sec'	120	0.15	2
'LFOA5'	'2 Sec'	120	0.45	2
'LFOA5'	'2 Sec'	120	0.35	2
'LFOA6'	'2 Sec'	120	0.9	10
'LFOA6'	'2 Sec'	120	0.8	10
'LFOA6'	'2 Sec'	120	1	5
'LFOA6'	'2 Sec'	120	0.75	8
'LFOA6'	'2 Sec'	120	0.5	10
'LFOA6'	'2 Sec'	120	0.25	9
'LFOA6'	'2 Sec'	120	0.05	6
'LFOA6'	'2 Sec'	120	0.85	9
'LFOA6'	'2 Sec'	120	0.65	10
'LFOA6'	'2 Sec'	120	0.3	10
'LFOA6'	'2 Sec'	120	0.7	8
'LFOA6'	'2 Sec'	120	0.95	5
'LFOA6'	'2 Sec'	120	0.4	9
'LFOA6'	'2 Sec'	120	0.55	10
'LFOA6'	'2 Sec'	120	0.6	9
'LFOA6'	'2 Sec'	120	0.2	5
'LFOA6'	'2 Sec'	120	0.1	6
'LFOA6'	'2 Sec'	120	0.35	10
'LFOA6'	'2 Sec'	120	0.15	5
'LFOA6'	'2 Sec'	120	0.45	9
'LFOA7'	'2 Sec'	120	0.9	16
'LFOA7'	'2 Sec'	120	0.85	18
'LFOA7'	'2 Sec'	120	0.8	18
'LFOA7'	'2 Sec'	120	0.75	19
'LFOA7'	'2 Sec'	120	0.5	18
'LFOA7'	'2 Sec'	120	0.05	9
'LFOA7'	'2 Sec'	120	1	9
'LFOA7'	'2 Sec'	120	0.25	9
'LFOA7'	'2 Sec'	120	0.95	12
'LFOA7'	'2 Sec'	120	0.4	19
'LFOA7'	'2 Sec'	120	0.2	10
'LFOA7'	'2 Sec'	120	0.3	13
'LFOA7'	'2 Sec'	120	0.1	9
'LFOA7'	'2 Sec'	120	0.65	20
'LFOA7'	'2 Sec'	120	0.6	20
'LFOA7'	'2 Sec'	120	0.55	17
'LFOA7'	'2 Sec'	120	0.7	19
'LFOA7'	'2 Sec'	120	0.15	7
'LFOA7'	'2 Sec'	120	0.45	21
'LFOA7'	'2 Sec'	120	0.35	22
'LFOA8'	'2 Sec'	120	1	4
'LFOA8'	'2 Sec'	120	0.9	5
'LFOA8'	'2 Sec'	120	0.85	5
'LFOA8'	'2 Sec'	120	0.8	4
'LFOA8'	'2 Sec'	120	0.75	4
'LFOA8'	'2 Sec'	120	0.5	5
'LFOA8'	'2 Sec'	120	0.25	3
'LFOA8'	'2 Sec'	120	0.05	1
'LFOA8'	'2 Sec'	120	0.95	5
'LFOA8'	'2 Sec'	120	0.7	5
'LFOA8'	'2 Sec'	120	0.55	4
'LFOA8'	'2 Sec'	120	0.65	5
'LFOA8'	'2 Sec'	120	0.6	5
'LFOA8'	'2 Sec'	120	0.2	4
'LFOA8'	'2 Sec'	120	0.4	4
'LFOA8'	'2 Sec'	120	0.3	4
'LFOA8'	'2 Sec'	120	0.1	2
'LFOA8'	'2 Sec'	120	0.35	4
'LFOA8'	'2 Sec'	120	0.15	2
'LFOA8'	'2 Sec'	120	0.45	5
'LFOA9'	'2 Sec'	120	0.95	19
'LFOA9'	'2 Sec'	120	0.65	15
'LFOA9'	'2 Sec'	120	0.55	17
'LFOA9'	'2 Sec'	120	0.3	14
'LFOA9'	'2 Sec'	120	0.1	14
'LFOA9'	'2 Sec'	120	0.7	17
'LFOA9'	'2 Sec'	120	0.4	15
'LFOA9'	'2 Sec'	120	0.6	15
'LFOA9'	'2 Sec'	120	0.2	15
'LFOA9'	'2 Sec'	120	0.8	18
'LFOA9'	'2 Sec'	120	1	21
'LFOA9'	'2 Sec'	120	0.85	19
'LFOA9'	'2 Sec'	120	0.25	14
'LFOA9'	'2 Sec'	120	0.5	17
'LFOA9'	'2 Sec'	120	0.9	19
'LFOA9'	'2 Sec'	120	0.75	17
'LFOA9'	'2 Sec'	120	0.05	11
'LFOA9'	'2 Sec'	120	0.35	14
'LFOA9'	'2 Sec'	120	0.45	18
'LFOA9'	'2 Sec'	120	0.15	14
'LFOA10'	'2 Sec'	120	0.65	24
'LFOA10'	'2 Sec'	120	0.55	22
'LFOA10'	'2 Sec'	120	0.1	21
'LFOA10'	'2 Sec'	120	0.95	26
'LFOA10'	'2 Sec'	120	0.3	20
'LFOA10'	'2 Sec'	120	0.6	23
'LFOA10'	'2 Sec'	120	0.2	20
'LFOA10'	'2 Sec'	120	0.4	24
'LFOA10'	'2 Sec'	120	0.85	27
'LFOA10'	'2 Sec'	120	1	17
'LFOA10'	'2 Sec'	120	0.05	16
'LFOA10'	'2 Sec'	120	0.9	28
'LFOA10'	'2 Sec'	120	0.25	19
'LFOA10'	'2 Sec'	120	0.5	22
'LFOA10'	'2 Sec'	120	0.75	23
'LFOA10'	'2 Sec'	120	0.8	27
'LFOA10'	'2 Sec'	120	0.35	22
'LFOA10'	'2 Sec'	120	0.15	22
'LFOA10'	'2 Sec'	120	0.7	23
'LFOA10'	'2 Sec'	120	0.45	23
'LFOA11'	'2 Sec'	120	0.1	5
'LFOA11'	'2 Sec'	120	0.2	4
'LFOA11'	'2 Sec'	120	0.95	6
'LFOA11'	'2 Sec'	120	0.65	7
'LFOA11'	'2 Sec'	120	0.55	7
'LFOA11'	'2 Sec'	120	0.3	5
'LFOA11'	'2 Sec'	120	0.7	7
'LFOA11'	'2 Sec'	120	0.6	7
'LFOA11'	'2 Sec'	120	0.4	5
'LFOA11'	'2 Sec'	120	0.25	4
'LFOA11'	'2 Sec'	120	0.8	7
'LFOA11'	'2 Sec'	120	1	3
'LFOA11'	'2 Sec'	120	0.85	7
'LFOA11'	'2 Sec'	120	0.75	7
'LFOA11'	'2 Sec'	120	0.9	8
'LFOA11'	'2 Sec'	120	0.05	3
'LFOA11'	'2 Sec'	120	0.5	6
'LFOA11'	'2 Sec'	120	0.35	5
'LFOA11'	'2 Sec'	120	0.45	6
'LFOA11'	'2 Sec'	120	0.15	3
'LFOA12'	'2 Sec'	120	0.1	0
'LFOA12'	'2 Sec'	120	0.65	1
'LFOA12'	'2 Sec'	120	0.6	2
'LFOA12'	'2 Sec'	120	0.55	1
'LFOA12'	'2 Sec'	120	0.2	1
'LFOA12'	'2 Sec'	120	0.3	1
'LFOA12'	'2 Sec'	120	0.7	1
'LFOA12'	'2 Sec'	120	0.95	2
'LFOA12'	'2 Sec'	120	0.75	1
'LFOA12'	'2 Sec'	120	1	1
'LFOA12'	'2 Sec'	120	0.25	1
'LFOA12'	'2 Sec'	120	0.05	0
'LFOA12'	'2 Sec'	120	0.5	1
'LFOA12'	'2 Sec'	120	0.8	1
'LFOA12'	'2 Sec'	120	0.85	2
'LFOA12'	'2 Sec'	120	0.9	1
'LFOA12'	'2 Sec'	120	0.45	3
'LFOA12'	'2 Sec'	120	0.15	0
'LFOA12'	'2 Sec'	120	0.4	1
'LFOA12'	'2 Sec'	120	0.35	1
'LFOA13'	'2 Sec'	120	0.7	11
'LFOA13'	'2 Sec'	120	0.55	12
'LFOA13'	'2 Sec'	120	0.3	9
'LFOA13'	'2 Sec'	120	0.2	11
'LFOA13'	'2 Sec'	120	0.65	10
'LFOA13'	'2 Sec'	120	0.6	12
'LFOA13'	'2 Sec'	120	0.95	12
'LFOA13'	'2 Sec'	120	0.4	12
'LFOA13'	'2 Sec'	120	0.9	14
'LFOA13'	'2 Sec'	120	0.85	13
'LFOA13'	'2 Sec'	120	0.05	6
'LFOA13'	'2 Sec'	120	0.8	13
'LFOA13'	'2 Sec'	120	0.75	13
'LFOA13'	'2 Sec'	120	0.25	9
'LFOA13'	'2 Sec'	120	0.5	12
'LFOA13'	'2 Sec'	120	1	9
'LFOA13'	'2 Sec'	120	0.35	9
'LFOA13'	'2 Sec'	120	0.1	10
'LFOA13'	'2 Sec'	120	0.45	12
'LFOA13'	'2 Sec'	120	0.15	11
'LFOA14'	'2 Sec'	120	0.65	6
'LFOA14'	'2 Sec'	120	0.95	5
'LFOA14'	'2 Sec'	120	0.3	4
'LFOA14'	'2 Sec'	120	0.1	4
'LFOA14'	'2 Sec'	120	0.55	5
'LFOA14'	'2 Sec'	120	0.7	6
'LFOA14'	'2 Sec'	120	0.4	4
'LFOA14'	'2 Sec'	120	0.2	4
'LFOA14'	'2 Sec'	120	0.6	6
'LFOA14'	'2 Sec'	120	0.5	4
'LFOA14'	'2 Sec'	120	0.85	6
'LFOA14'	'2 Sec'	120	0.75	6
'LFOA14'	'2 Sec'	120	0.8	6
'LFOA14'	'2 Sec'	120	0.05	4
'LFOA14'	'2 Sec'	120	0.25	4
'LFOA14'	'2 Sec'	120	1	7
'LFOA14'	'2 Sec'	120	0.9	5
'LFOA14'	'2 Sec'	120	0.35	4
'LFOA14'	'2 Sec'	120	0.15	4
'LFOA14'	'2 Sec'	120	0.45	4
'LFOA15'	'2 Sec'	120	0.95	3
'LFOA15'	'2 Sec'	120	0.65	2
'LFOA15'	'2 Sec'	120	0.55	1
'LFOA15'	'2 Sec'	120	0.7	1
'LFOA15'	'2 Sec'	120	0.6	1
'LFOA15'	'2 Sec'	120	0.4	2
'LFOA15'	'2 Sec'	120	0.1	2
'LFOA15'	'2 Sec'	120	0.2	3
'LFOA15'	'2 Sec'	120	0.3	0
'LFOA15'	'2 Sec'	120	1	4
'LFOA15'	'2 Sec'	120	0.9	3
'LFOA15'	'2 Sec'	120	0.8	3
'LFOA15'	'2 Sec'	120	0.25	2
'LFOA15'	'2 Sec'	120	0.5	1
'LFOA15'	'2 Sec'	120	0.85	4
'LFOA15'	'2 Sec'	120	0.05	0
'LFOA15'	'2 Sec'	120	0.75	2
'LFOA15'	'2 Sec'	120	0.35	1
'LFOA15'	'2 Sec'	120	0.15	0
'LFOA15'	'2 Sec'	120	0.45	2
'YA1'	'4 Sec'	120	0.75	26
'YA1'	'4 Sec'	120	0.5	24
'YA1'	'4 Sec'	120	0.8	29
'YA1'	'4 Sec'	120	0.85	27
'YA1'	'4 Sec'	120	0.25	17
'YA1'	'4 Sec'	120	0.05	14
'YA1'	'4 Sec'	120	1	21
'YA1'	'4 Sec'	120	0.9	27
'YA1'	'4 Sec'	120	0.15	15
'YA1'	'4 Sec'	120	0.6	27
'YA1'	'4 Sec'	120	0.7	28
'YA1'	'4 Sec'	120	0.1	16
'YA1'	'4 Sec'	120	0.65	28
'YA1'	'4 Sec'	120	0.95	23
'YA1'	'4 Sec'	120	0.2	16
'YA1'	'4 Sec'	120	0.4	19
'YA1'	'4 Sec'	120	0.3	20
'YA1'	'4 Sec'	120	0.45	21
'YA1'	'4 Sec'	120	0.35	19
'YA1'	'4 Sec'	120	0.55	23
'YA1'	'4 Sec'	16	0.45	25
'YA1'	'4 Sec'	16	0.4	25
'YA1'	'4 Sec'	16	0.35	23
'YA1'	'4 Sec'	16	0.3	26
'YA1'	'4 Sec'	16	0.2	24
'YA1'	'4 Sec'	16	0.15	23
'YA1'	'4 Sec'	16	0.25	25
'YA1'	'4 Sec'	16	0.1	26
'YA1'	'4 Sec'	16	0.05	25
'YA1'	'4 Sec'	16	1	22
'YA1'	'4 Sec'	16	0.5	22
'YA1'	'4 Sec'	16	0.7	23
'YA1'	'4 Sec'	16	0.6	23
'YA1'	'4 Sec'	16	0.95	21
'YA1'	'4 Sec'	16	0.85	24
'YA1'	'4 Sec'	16	0.8	24
'YA1'	'4 Sec'	16	0.75	24
'YA1'	'4 Sec'	16	0.65	23
'YA1'	'4 Sec'	16	0.55	25
'YA1'	'4 Sec'	16	0.9	28
'YA1'	'4 Sec'	32	0.45	24
'YA1'	'4 Sec'	32	0.4	21
'YA1'	'4 Sec'	32	0.2	22
'YA1'	'4 Sec'	32	0.25	22
'YA1'	'4 Sec'	32	0.15	22
'YA1'	'4 Sec'	32	0.05	25
'YA1'	'4 Sec'	32	0.3	21
'YA1'	'4 Sec'	32	1	24
'YA1'	'4 Sec'	32	0.1	27
'YA1'	'4 Sec'	32	0.35	22
'YA1'	'4 Sec'	32	0.6	27
'YA1'	'4 Sec'	32	0.9	21
'YA1'	'4 Sec'	32	0.5	25
'YA1'	'4 Sec'	32	0.65	26
'YA1'	'4 Sec'	32	0.8	23
'YA1'	'4 Sec'	32	0.95	21
'YA1'	'4 Sec'	32	0.85	23
'YA1'	'4 Sec'	32	0.75	25
'YA1'	'4 Sec'	32	0.55	25
'YA1'	'4 Sec'	32	0.7	25
'YA1'	'4 Sec'	64	0.45	24
'YA1'	'4 Sec'	64	0.4	23
'YA1'	'4 Sec'	64	0.25	19
'YA1'	'4 Sec'	64	0.2	18
'YA1'	'4 Sec'	64	0.1	17
'YA1'	'4 Sec'	64	0.15	18
'YA1'	'4 Sec'	64	0.05	17
'YA1'	'4 Sec'	64	0.85	25
'YA1'	'4 Sec'	64	0.95	22
'YA1'	'4 Sec'	64	0.65	24
'YA1'	'4 Sec'	64	0.55	24
'YA1'	'4 Sec'	64	1	23
'YA1'	'4 Sec'	64	0.5	25
'YA1'	'4 Sec'	64	0.9	25
'YA1'	'4 Sec'	64	0.7	27
'YA1'	'4 Sec'	64	0.8	27
'YA1'	'4 Sec'	64	0.6	25
'YA1'	'4 Sec'	64	0.75	26
'YA1'	'4 Sec'	64	0.35	23
'YA1'	'4 Sec'	64	0.3	21
'YA2'	'4 Sec'	120	1	13
'YA2'	'4 Sec'	120	0.9	13
'YA2'	'4 Sec'	120	0.25	14
'YA2'	'4 Sec'	120	0.8	13
'YA2'	'4 Sec'	120	0.85	13
'YA2'	'4 Sec'	120	0.75	13
'YA2'	'4 Sec'	120	0.5	13
'YA2'	'4 Sec'	120	0.05	13
'YA2'	'4 Sec'	120	0.65	13
'YA2'	'4 Sec'	120	0.4	14
'YA2'	'4 Sec'	120	0.65	13
'YA2'	'4 Sec'	120	0.55	14
'YA2'	'4 Sec'	120	0.35	14
'YA2'	'4 Sec'	120	0.2	14
'YA2'	'4 Sec'	120	0.95	13
'YA2'	'4 Sec'	120	0.3	15
'YA2'	'4 Sec'	120	0.1	13
'YA2'	'4 Sec'	120	0.45	13
'YA2'	'4 Sec'	120	0.6	13
'YA2'	'4 Sec'	120	0.15	14
'YA2'	'4 Sec'	120	0.7	13
'YA2'	'4 Sec'	16	0.4	14
'YA2'	'4 Sec'	16	0.45	14
'YA2'	'4 Sec'	16	0.35	15
'YA2'	'4 Sec'	16	0.3	14
'YA2'	'4 Sec'	16	0.1	16
'YA2'	'4 Sec'	16	0.05	15
'YA2'	'4 Sec'	16	0.2	16
'YA2'	'4 Sec'	16	0.15	16
'YA2'	'4 Sec'	16	0.25	16
'YA2'	'4 Sec'	16	0.7	14
'YA2'	'4 Sec'	16	0.55	14
'YA2'	'4 Sec'	16	0.65	14
'YA2'	'4 Sec'	16	0.8	15
'YA2'	'4 Sec'	16	0.85	14
'YA2'	'4 Sec'	16	0.75	13
'YA2'	'4 Sec'	16	0.9	12
'YA2'	'4 Sec'	16	0.6	14
'YA2'	'4 Sec'	16	1	13
'YA2'	'4 Sec'	16	0.5	14
'YA2'	'4 Sec'	16	0.95	13
'YA2'	'4 Sec'	32	0.45	13
'YA2'	'4 Sec'	32	0.4	14
'YA2'	'4 Sec'	32	0.2	14
'YA2'	'4 Sec'	32	0.15	14
'YA2'	'4 Sec'	32	0.1	14
'YA2'	'4 Sec'	32	0.65	14
'YA2'	'4 Sec'	32	0.25	14
'YA2'	'4 Sec'	32	0.05	14
'YA2'	'4 Sec'	32	0.3	13
'YA2'	'4 Sec'	32	0.35	13
'YA2'	'4 Sec'	32	0.55	13
'YA2'	'4 Sec'	32	0.85	14
'YA2'	'4 Sec'	32	0.5	14
'YA2'	'4 Sec'	32	1	13
'YA2'	'4 Sec'	32	0.6	14
'YA2'	'4 Sec'	32	0.75	13
'YA2'	'4 Sec'	32	0.9	14
'YA2'	'4 Sec'	32	0.95	13
'YA2'	'4 Sec'	32	0.8	13
'YA2'	'4 Sec'	32	0.7	14
'YA2'	'4 Sec'	64	0.4	14
'YA2'	'4 Sec'	64	0.45	13
'YA2'	'4 Sec'	64	0.15	16
'YA2'	'4 Sec'	64	0.2	15
'YA2'	'4 Sec'	64	0.1	15
'YA2'	'4 Sec'	64	0.05	17
'YA2'	'4 Sec'	64	1	13
'YA2'	'4 Sec'	64	0.25	16
'YA2'	'4 Sec'	64	0.55	13
'YA2'	'4 Sec'	64	0.9	14
'YA2'	'4 Sec'	64	0.75	13
'YA2'	'4 Sec'	64	0.65	13
'YA2'	'4 Sec'	64	0.8	14
'YA2'	'4 Sec'	64	0.95	13
'YA2'	'4 Sec'	64	0.6	13
'YA2'	'4 Sec'	64	0.7	13
'YA2'	'4 Sec'	64	0.5	13
'YA2'	'4 Sec'	64	0.85	14
'YA2'	'4 Sec'	64	0.3	14
'YA2'	'4 Sec'	64	0.35	14
'YA3'	'4 Sec'	120	0.8	24
'YA3'	'4 Sec'	120	0.85	21
'YA3'	'4 Sec'	120	0.05	11
'YA3'	'4 Sec'	120	0.9	20
'YA3'	'4 Sec'	120	0.25	17
'YA3'	'4 Sec'	120	0.5	24
'YA3'	'4 Sec'	120	0.75	24
'YA3'	'4 Sec'	120	1	13
'YA3'	'4 Sec'	120	0.45	21
'YA3'	'4 Sec'	120	0.65	22
'YA3'	'4 Sec'	120	0.35	20
'YA3'	'4 Sec'	120	0.55	26
'YA3'	'4 Sec'	120	0.3	18
'YA3'	'4 Sec'	120	0.4	21
'YA3'	'4 Sec'	120	0.1	16
'YA3'	'4 Sec'	120	0.2	19
'YA3'	'4 Sec'	120	0.7	24
'YA3'	'4 Sec'	120	0.6	25
'YA3'	'4 Sec'	120	0.95	17
'YA3'	'4 Sec'	120	0.15	16
'YA3'	'4 Sec'	16	0.4	23
'YA3'	'4 Sec'	16	0.45	22
'YA3'	'4 Sec'	16	0.35	25
'YA3'	'4 Sec'	16	0.3	21
'YA3'	'4 Sec'	16	0.15	20
'YA3'	'4 Sec'	16	0.1	22
'YA3'	'4 Sec'	16	0.25	20
'YA3'	'4 Sec'	16	0.05	22
'YA3'	'4 Sec'	16	0.2	21
'YA3'	'4 Sec'	16	1	14
'YA3'	'4 Sec'	16	0.9	15
'YA3'	'4 Sec'	16	0.95	19
'YA3'	'4 Sec'	16	0.5	22
'YA3'	'4 Sec'	16	0.85	17
'YA3'	'4 Sec'	16	0.7	17
'YA3'	'4 Sec'	16	0.65	21
'YA3'	'4 Sec'	16	0.75	19
'YA3'	'4 Sec'	16	0.55	20
[truncated: 4,314 more rows]
